# Supplementary material for: A benzimidazole-based Cu( ii ) complex catalyzed site-selective C–H sulfenylation of imidazo-[1,2- a ]pyridines using CS 2 as a sulfur source
Source: Royal Society of Chemistry journal article supplement (doi:10.1039/d4ob00868e), 2024-01-01
Supplement: d4ob00868e1.pdf [file d4ob00868e1.pdf]

## Electronic Supplementary Information (ESI)

**A Benzimidazole-Based Cu(II) complex catalyzed Site-selective C-H Sulfenylation of Imidazo-[1,2-*a*] pyridines using CS<sub>2</sub> as a Sulfur Source**

**Kingkar Ghosh,<sup>a</sup> Narendra Nath Ghosh,<sup>b</sup> Prasun Choudhury,<sup>a</sup> Subham Bhattacharjee,<sup>c</sup> Rajat Saha,<sup>c</sup> and Mayukh Deb,<sup>a\*</sup> Kinkar Biswas<sup>a\*</sup>**

## Contents

| Details                                                                                                     | Page No. |
|-------------------------------------------------------------------------------------------------------------|----------|
| 1. General Information                                                                                      | S3       |
| 2. General procedure for the preparation of imidazo[1,2-a]pyridines/thiazole                                | S3       |
| 3. General methods for Catalyst preparation                                                                 | S4-S5    |
| 3.1. General methods for 1-butyl benzimidazole preparation                                                  | S4       |
| 3.2. General methods for ionic liquid (IL) preparation                                                      | S4       |
| 3.3. General methods for copper catalyst (Cu-Cat-1) synthesis                                               | S4-S5    |
| 4. General procedure of Cu(II)-catalyzed C-H sulfenylation of imidazo[1,2-a]pyridines using CS <sub>2</sub> | S5       |
| 5. Characterization of ionic liquid (IL)                                                                    | S6       |
| 5.1. NMR data of ionic liquid (IL)                                                                          | S6       |
| 5.2. NMR images of ionic liquid (IL)                                                                        | S7-S8    |
| 6. Characterization of Cu-Cat-1                                                                             | S9       |
| 6.1. NMR data of the Cu-Cat-1                                                                               | S9       |
| 6.2. NMR image of Cu-Cat-1                                                                                  | S9       |
| 6.3. EPR image of Cu-Cat-1                                                                                  | S10      |
| 6.4. Single crystal XRD data of the Cu-Cat-1                                                                | S10-S11  |
| 6.5. ORTEP image of the Cu-Cat-1                                                                            | S11      |
| 7. Optimization of sulfenylation of imidazo[1,2-a]pyridines/thiazoles at various conditions                 | S12-S13  |
| Table S1. Use of different Solvents                                                                         | S12      |
| Table S2. Effect of Time and temperature in reaction progress                                               | S12      |
| Table S3. Catalyst Loading                                                                                  | S12      |
| Table S4. Use of different Cu based catalyst                                                                | S13      |
| Table S5. Use of different sulfur sources                                                                   | S13      |
| Table S6. Use of different bases                                                                            | S13      |
| 8. Characterization data of synthesized 3-(Alkylthio)-2-arylimidazo [1,2-a]pyridine/thiazole derivatives    | S14-S20  |
| 9. Characterization data of S,S-dibenzyl trithiocarbonate                                                   | S21      |
| 10. NMR and HRMS spectra of all 3-(Alkylthio)-2-arylimidazo [1,2-a]pyridine/thiazole derivatives            | S22-S64  |
| 11. NMR and FTIR spectra of S,S-dibenzyl trithiocarbonate                                                   | S63-S65  |
| 12. Single crystal XRD data of the 2-(4-chlorophenyl)-3-((4-methylbenzyl)thio)imidazo[1,2-a]pyridine (2g)   | S66      |
| 13. ORTEP image of the 2-(4-chlorophenyl)-3-((4-methylbenzyl)thio)imidazo[1,2-a]pyridine (2g)               | S67      |
| 14. Computational details                                                                                   | S68      |
| 15. Optimized geometric coordinates (XYZ coordinates)                                                       | S68-S74  |
| 16. References                                                                                              | S75      |

## 1. General Information

All reagents and solvents were obtained from commercial suppliers and used without further purification. Column chromatography was performed on silica gel (100~200 mesh).  $^1\text{H}$  and  $^{13}\text{C}$  NMR data were recorded in BRUKER AVANCENE0 400 MHz NMR spectrometer. Chemical shifts ( $\delta$ ) are expressed in parts per million (ppm), coupling constants ( $J$ ) are in Hz. Proton and carbon magnetic resonance spectra ( $^1\text{H}$  NMR at 400 MHz and  $^{13}\text{C}$  NMR at 100 MHz) were recorded using tetramethylsilane (TMS) as the internal standard in  $\text{CDCl}_3$  and  $d_6$ -DMSO. The FT-IR spectra of the prepared compounds were recorded using a Bruker Alpha III IR-spectrophotometer operating in the wavenumber region from 4000 to 400  $\text{cm}^{-1}$  in dry KBr. High resolution mass spectra were measured on an ESI source Xevo G-2s Q ToF (Waters, USA) at MNIT, Jaipur, India. Single crystal XRD was done in Bruker Kappa Apex II at STIC Cochin, India. Electron spin resonance (ESR) spectra was measured on JEOL, Model: JES-FA200 at IIT Guwahati, India.

## 2. General procedure for the preparation of imidazo[1,2-a]pyridines/thiazoles

The various imidazo[1,2-a]pyridines/thiazole derivatives were synthesized according to our reported procedures.<sup>1</sup> 2-aminopyridine derivative (1.0 mmol), Amberlyst®A-26(OH) (20 mg) and substituted phenacyl bromide (1.0mmol) were taken in a 25 mL round bottom flask. 5 mL of deionized water was added to it. Then the resulting mixture was stirred for 6-8 hours at 60 °C, till the reaction was completed. The progress of the reaction was monitored using thin layer chromatography (TLC). After completion of the reaction, the organic part of the reaction mixture was extracted in ethyl acetate (3 x 5 mL). The combined organic layer was then dried over anhydrous  $\text{Na}_2\text{SO}_4$  and the volume was reduced under vacuum. The white/yellow/light brown coloured products were washed with a mixture of petroleum ether and diethyl ether (7:3) and then finally crystallized in dehydrated ethanol. Few imidazo[1,2-a]pyridines were purified in column chromatography with petroleum ether and ethyl acetate (9:1) as eluent.

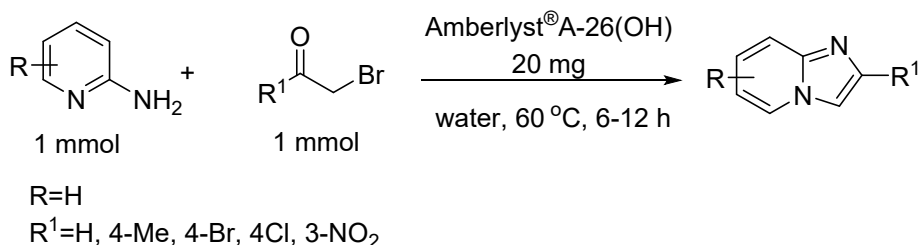

### 3. General methods for Catalyst preparation

#### 3.1. General methods for 1-butyl benzimidazole preparation

In a round bottomed flask, benzimidazole (5.9 g, 50.0 mmol), 1-bromobutane (7.0 g, 51.0 mmol) and potassium hydroxide (5.6 g, 100.0 mmol) were mixed in 30 mL of acetonitrile (HPLC grade). This mixture was then refluxed for about four and half hours and cooled at room temperature. 50 mL of water was added to the reaction mixture and extracted with ethyl acetate (3 x 30 mL). The combined organic layer was passed through the sodium sulfate and finally charged over column chromatography. The pure 1-butyl benzimidazole (4.9 g, 84% yield) was purified by a mixture of petroleum ether and ethyl acetate (7:3) as an eluting solvent.

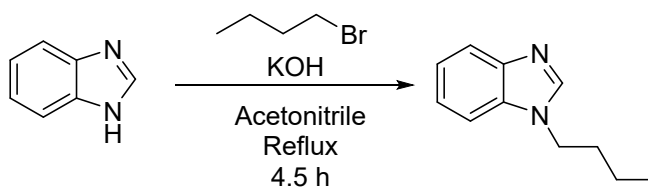

#### 3.2. General methods for ionic liquid (IL) preparation

In the second step, the pure 1-butyl benzimidazole (4.33 g, 25.0 mmol), ethylchloroacetate (3.7 g, 25.0 mmol) and absolute ethanol (21.0 mL) was taken in a 100 mL round bottomed flask. The mixture was refluxed for 28 hours under N<sub>2</sub> atmosphere. After the reaction was completed, the mixture was cooled to room temperature, and the solvent was then removed under vacuum. The resulting gummy solid was then washed several times with ethyl acetate (10 x 10 mL) to obtain a pure white solid of desired ionic liquid (3.42 g, 75% yield). In this procedure, the ester group of the ionic liquid was hydrolyzed to corresponding carboxylic acid group.

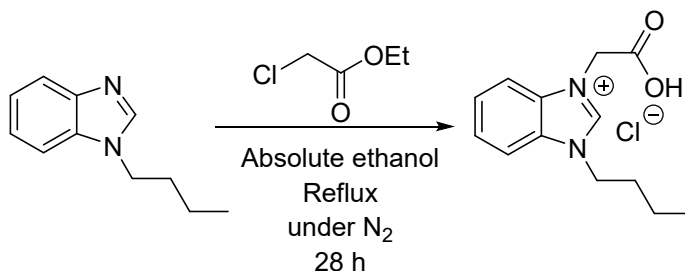

### 3.3. General methods for copper catalyst (Cu-Cat-1) synthesis

To a solution of ionic liquid (268.75 mg, 1.0 mmol) and acetonitrile (5.0 mL, HPLC grade),  $\text{Cu}(\text{OAc})_2 \cdot \text{H}_2\text{O}$  (199.5 mg, 1.0 mmol) was added. The resulting reaction mixture was refluxed for 48 h. After cooling the reaction mixture, it was filtrated through a Whatman 42 filter paper and the resulting brownish yellow coloured Cu complex was washed several times with diethyl ether. Finally, the copper complex was crystallized in a binary solvent mixture (acetonitrile and petroleum ether by diffusion method). The isolated yield was 68%.

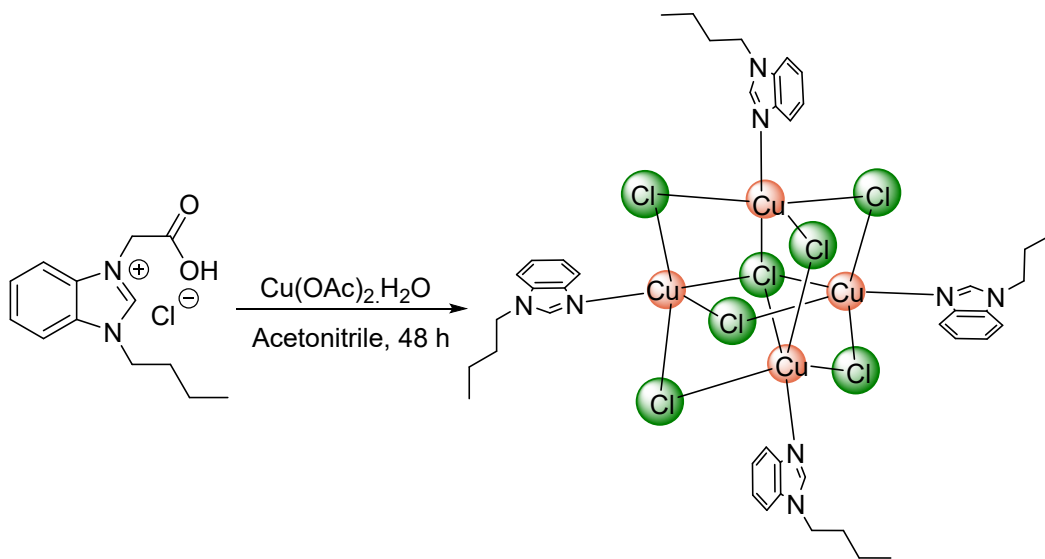

### 4. General procedure of Cu(II)-catalyzed C-H sulfenylation of imidazo[1,2-*a*]pyridines using $\text{CS}_2$ (2a-2r)

2-Arylimidazo[1,2-*a*]pyridine/thiazole 1a (0.5 mmol, 1.0 equiv.),  $\text{CS}_2$  (1.0 mmol, 2 equiv.), and benzyl/alkyl/allyl halide (0.7 mmol, 1.4 equiv.) were added in a high pressure reaction vessel with DMF: $\text{H}_2\text{O}$  (9:1, 1 mL), followed by the addition of Cu-Cat-1 complex (1 mol%). The mixture was stirred at 100 °C in a preheated oil bath. After 14 h, the reaction was cooled down to room temperature, water was added and diluted with ethyl acetate, washed with brine, dried over anhydrous  $\text{Na}_2\text{SO}_4$  and concentrated under vacuum. The residue was purified by normal column chromatography using a mixture of petroleum ether and ethyl acetate (17:3) as an eluting solvent on silica gel (100-200 mesh) to afford the desired product as a yellow oil in most of the cases (65-74% yield).

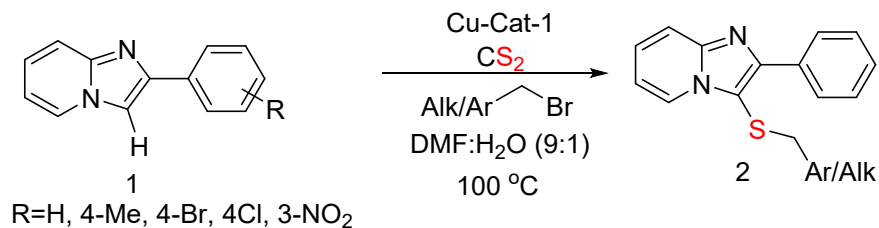

## 5. Characterization of Ionic liquid (IL)

### 5.1. NMR data of ionic liquid (IL)

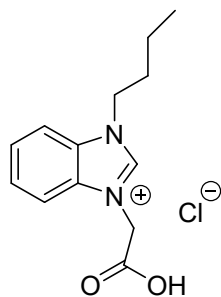

White Solid;  $^1\text{H}$ NMR (400 MHz,  $\text{d}_6\text{-DMSO}$ ):  $\delta$  (in ppm) 0.91(t,  $J=8\text{Hz}$ , 3H), 1.30-1.35 (m, 1H), 1.85-1.92 (m, 2H), 4.60 (t,  $J=8\text{Hz}$ , 2H), 5.59 (s, 2H), 7.66-7.71 (m, 2H), 8.06-8.16 (m, 2H), 10.16 (s, 1H);

$^{13}\text{C}$  NMR (100 MHz,  $\text{d}_6\text{-DMSO}$ ):  $\delta$  (in ppm) 13.94, 19.56, 31.08, 47.11, 48.22, 114.50, 127.35, 131.72, 132.16, 143.91, 168.38

## 5.2. NMR images of ionic liquid (IL)

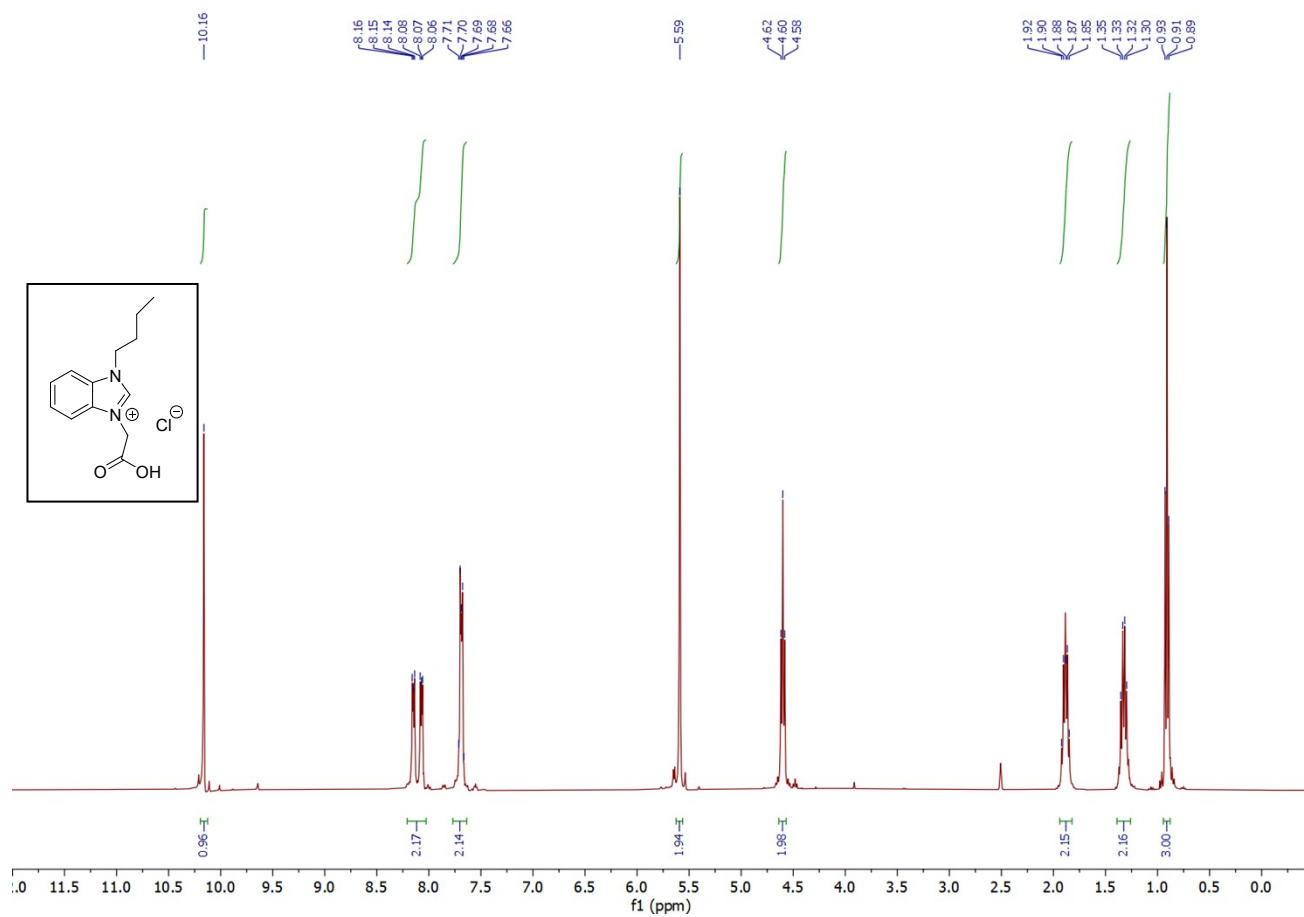

$^1\text{H}$  NMR spectra of Ionic liquid

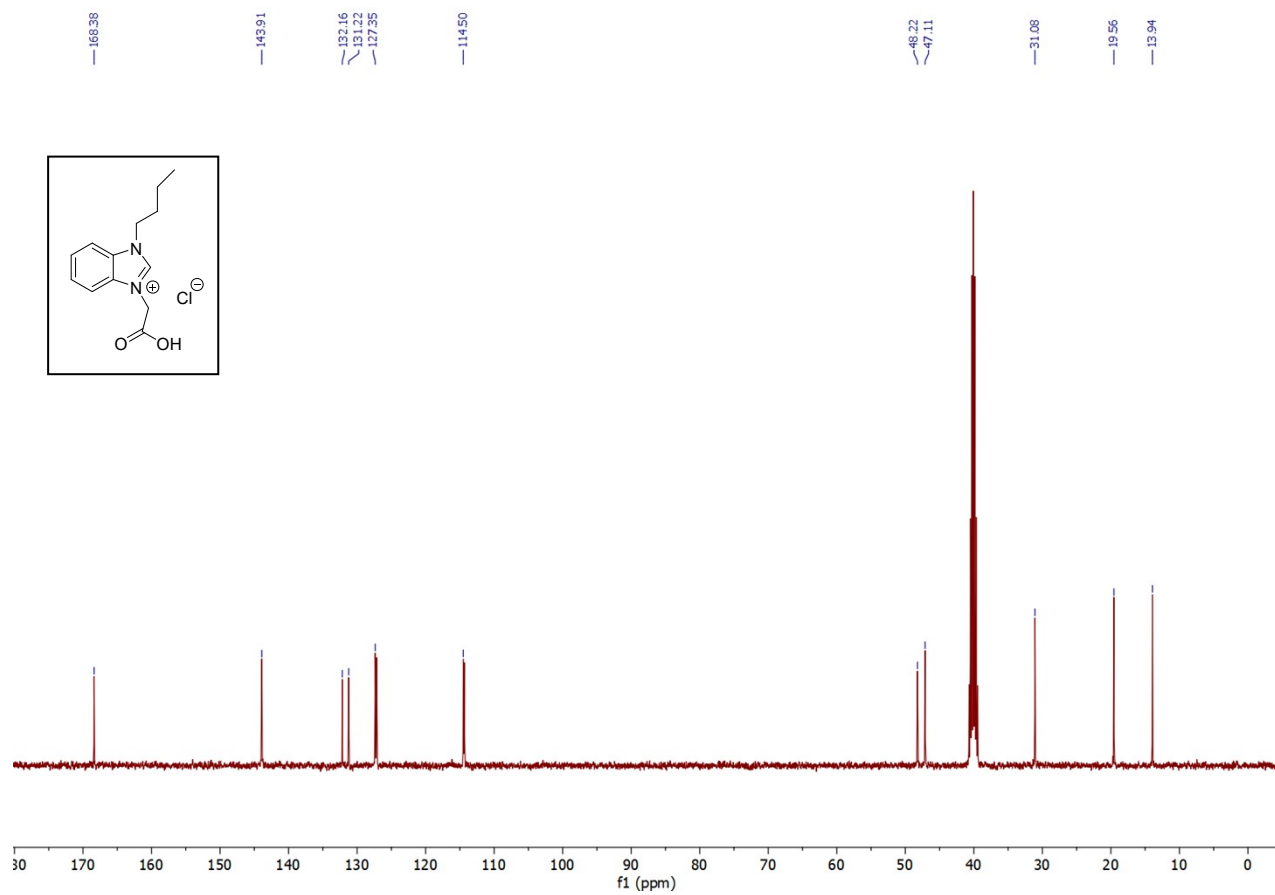

$^{13}\text{C}$  NMR spectra of Ionic liquid



## 6. Characterization of Cu-Cat-1

### 6.1. NMR data of Cu-Cat-1

Brownish yellow crystalline solid.

$^1\text{H}$  NMR (400 MHz,  $d_6$ -DMSO):  $\delta$  (in ppm) 0.78-0.87 (bs, 5H), 1.79 (s, 2H), 5.53 (s, 2H), 6.43 (s, 1H), 6.69 (s, 1H), 7.77 (s, 1H).

### 6.2. NMR image of Cu-Cat-1

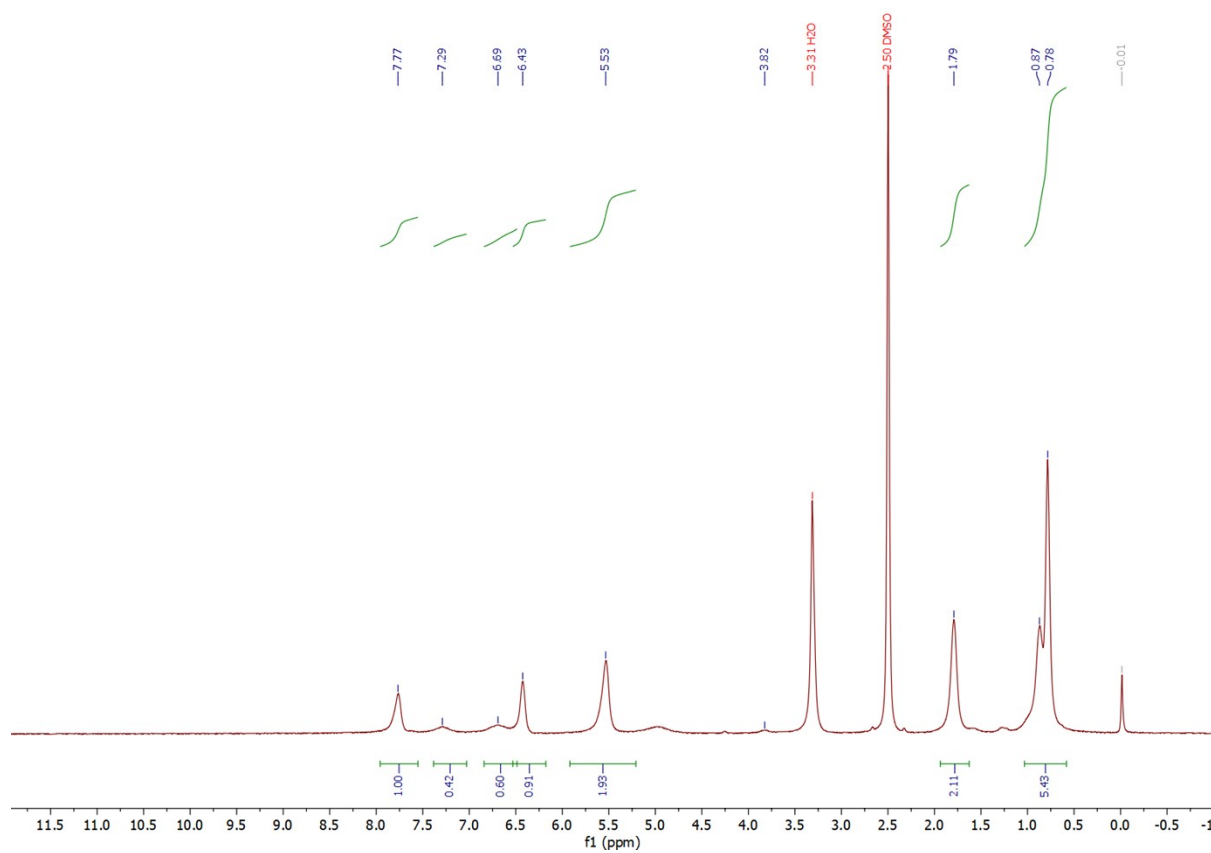

### 6.3. EPR image of Cu-Cat-1

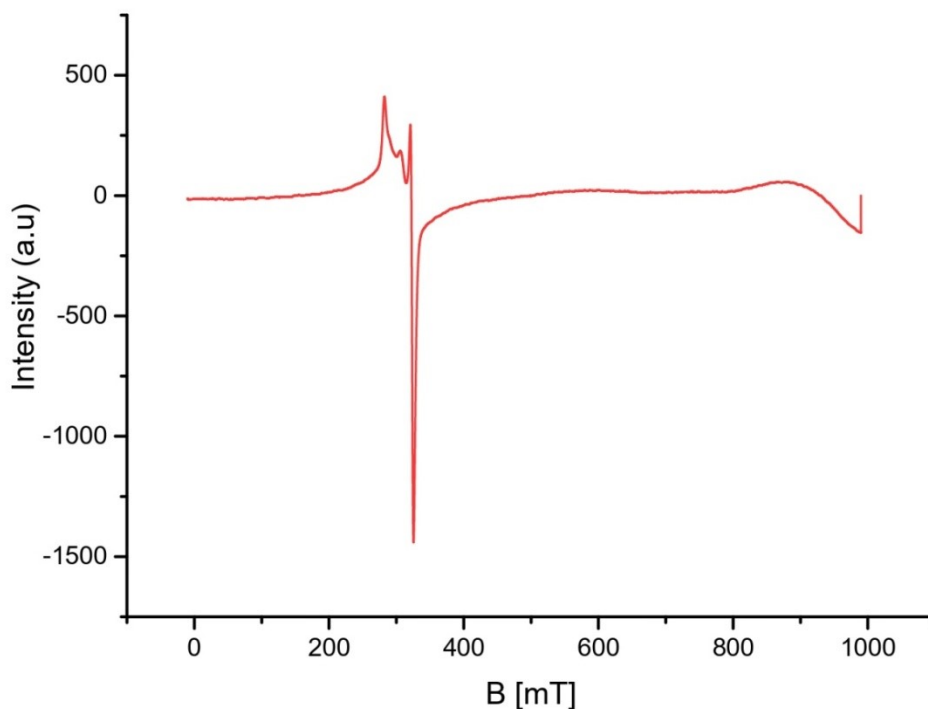

### 6.4. Single crystal XRD data of the Cu-Cat-1

|                                 |                                                                                                                   |
|---------------------------------|-------------------------------------------------------------------------------------------------------------------|
| Identification code             | shelx                                                                                                             |
| Empirical formula               | $C_{44}H_{56}C_{17}Cu_4N_8$                                                                                       |
| Formula weight                  | 1199.27                                                                                                           |
| Temperature                     | 293(2) K                                                                                                          |
| Wavelength                      | 1.54016 Å                                                                                                         |
| Crystal system, space group     | Monoclinic, P 21/n                                                                                                |
| Unit cell dimensions            | a = 12.1373(11) Å,    alpha = 90deg.<br>b = 21.089(3) Å,    beta = 90 deg.<br>c = 20.202(2) Å,    gamma = 90 deg. |
| Volume                          | 5171.0(10) Å <sup>3</sup>                                                                                         |
| Z, Calculated density           | 4, 1.540 Mg/m <sup>3</sup>                                                                                        |
| Absorption coefficient          | 5.379 mm <sup>-1</sup>                                                                                            |
| F(000)                          | 2444                                                                                                              |
| Crystal size                    | 0.14 x 0.10 x 0.08 mm <sup>3</sup>                                                                                |
| Theta range for data collection | 3.026 to 52.273°                                                                                                  |

|                                   |                                                |
|-----------------------------------|------------------------------------------------|
| Limiting indices                  | -12 ≤ h ≤ 11,<br>-14 ≤ k ≤ 21,<br>-20 ≤ l ≤ 18 |
| Reflections collected / unique    | 5769 / 3514 [R(int) = 0.0544]                  |
| Completeness to theta = 52.273°   | 60%                                            |
| Absorption correction             | Semi-empirical from equivalents                |
| Max. and min. transmission        | 0.745 and 0.564                                |
| Refinement method                 | Full-matrix least-squares on F <sup>2</sup>    |
| Data / restraints / parameters    | 3514 / 49 / 564                                |
| Goodness-of-fit on F <sup>2</sup> | 1.209                                          |
| Final R indices [I > 2σ(I)]       | R1 = 0.0851, wR2 = 0.2250                      |
| R indices (all data)              | R1 = 0.1052, wR2 = 0.2453                      |
| Extinction coefficient            | n/a                                            |
| Largest diff. peak and hole       | 1.073 and -1.584 e. Å <sup>-3</sup>            |

### 6.5. ORTEP image of the Cu-Cat-1

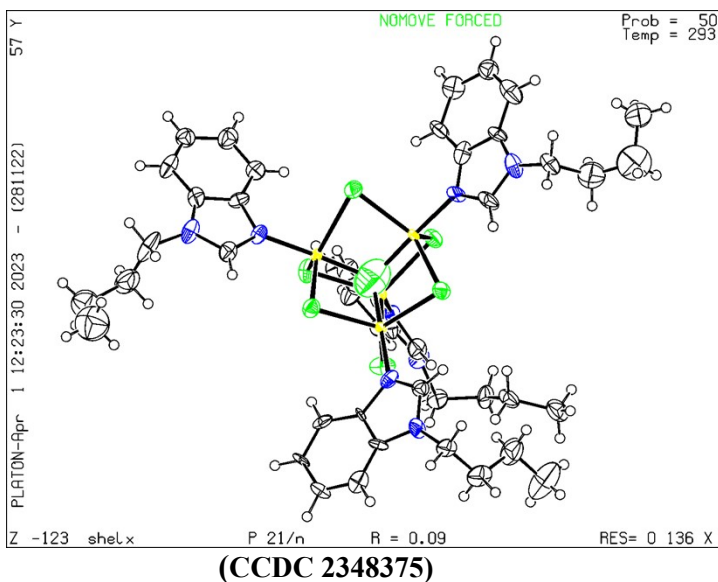

## 7. Optimization of sulfenylation of imidazo[1,2-a]pyridines/thiazoles at various conditions

**Table S1.** Use of different Solvents

| Sl. No | Solvent                   | % of Yield |
|--------|---------------------------|------------|
| 1      | DMF                       | 66         |
| 2      | MeCN                      | NR         |
| 3      | EtOH                      | 30         |
| 4      | MeOH                      | 26         |
| 5      | H <sub>2</sub> O          | Trace      |
| 6      | DMSO                      | 35         |
| 7      | DMF:H <sub>2</sub> O(9:1) | 70         |

N.B: NR=Not reacted

**Table S2.** Effect of Time and temperature in reaction progress

| Sl. No | Temp(°C) | Reaction Time(h) | Yields (%) |
|--------|----------|------------------|------------|
| 1      | 140      | 20               | 67         |
| 2      | 120      | 20               | 72         |
| 3      | 110      | 20               | 71         |
| 4      | 100      | 20               | 71         |
| 5      | 90       | 20               | 50         |
| 6      | 80       | 20               | Trace      |
| 7      | 60       | 20               | NR         |
| 8      | RT       | 20               | NR         |
| 9      | 100      | 18               | 71         |
| 10     | 100      | 16               | 70         |
| 11     | 100      | 14               | 70         |
| 12     | 100      | 12               | 65         |
| 13     | 100      | 10               | 58         |

N.B: NR=Not reacted

**Table S3.** Catalyst Loading

| Sl. No | Catalyst Loading (mol %) | % of Yield |
|--------|--------------------------|------------|
| 1      | 10                       | 62         |
| 2      | 5                        | 60         |
| 3      | 3                        | 59         |
| 4      | 1                        | 59         |
| 5      | 0.5                      | 47         |

<sup>a</sup>Reaction conditions: Imidazo[1,2-*a*]pyridine=0.5 mmol, Benzyl bromide=0.7 mmol; CS<sub>2</sub>=0.7 mmol, solvent=1 mL

**Table S4.** Use of different Cu based catalyst

| Sl. No | Catalyst             | % of Yield |
|--------|----------------------|------------|
| 1      | CuCl                 | 35         |
| 2      | CuBr                 | 43         |
| 3      | CuI                  | 53         |
| 4      | Cu(OAc) <sub>2</sub> | 37         |
| 5      | <b>Cu-Cat-1</b>      | 70         |

N.B: NR=Not reacted

**Table S5.** Use of different sulfur sources

| Sl. No | Sulfur source                                 | % of Yield |
|--------|-----------------------------------------------|------------|
| 1      | Sulfur powder                                 | 58         |
| 2      | Na <sub>2</sub> S <sub>2</sub> O <sub>3</sub> | 51         |
| 3      | DMSO                                          | trace      |
| 4      | CS <sub>2</sub>                               | 70         |

**Table S6.** Use of different bases

| Sl. No | Base                            | % of Yield |
|--------|---------------------------------|------------|
| 1      | K <sub>2</sub> CO <sub>3</sub>  | NR         |
| 2      | Na <sub>2</sub> CO <sub>3</sub> | NR         |
| 3      | DABCO                           | NR         |

N.B: NR=Not reacted

## S8. Characterization data of synthesized 3-(Alkylthio)-2-arylimidazo [1,2-a]pyridine/thiazole derivatives

### 3-(Benzylthio)-2-phenylimidazo [1,2-a]pyridine(2a)<sup>2</sup>

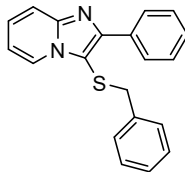

Eluent: petroleum ether/ethyl acetate (17:3), Yellow oil, 68% yield (107.0 mg).

<sup>1</sup>H NMR (400 MHz, CDCl<sub>3</sub>): δ (in ppm) 3.83(s,2H), 6.71-6.72(m,1H), 6.91-6.94(m,2H), 7.05-7.12(m,3H), 7.23-7.26(m,1H), 7.38-7.43(m,1H), 7.46-7.49(m,2H), 7.65-7.68(m,1H), 8.08-8.10(m,1H) 8.25-8.28(m,2H);

<sup>13</sup>C NMR (100 MHz, CDCl<sub>3</sub>): δ (in ppm) 40.6, 109.8, 112.8, 116.8, 124.3, 126.9, 127.4, 128.3, 128.4, 128.5, 128.6, 132.7, 136.9, 145.6, 148.9

### 3-(Benzylthio)-2-(p-tolyl)imidazo[1,2-a]pyridine (2b)

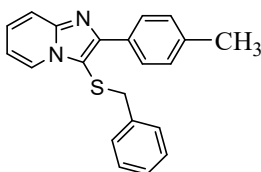

Eluent: petroleum ether/ethyl acetate (17:3), Yellow oil, 67% yield (111.0 mg).

<sup>1</sup>H NMR (400 MHz, CDCl<sub>3</sub>): δ (in ppm) 2.44 (s,3H), 3.83 (s,2H), 6.67-6.71 (m,1H), 6.93-6.95(m,2H), 7.05-7.11(m,3H), 7.21-7.25(m,1H), 7.28-7.32(m,3H), 7.65-7.68(m,1H), 8.03-8.07(m,1H), 8.19 (d, *J*=8Hz,2H);

<sup>13</sup>C NMR (100 MHz, CDCl<sub>3</sub>): δ (in ppm) 21.36, 40.45, 109.22, 112.45, 112.94, 116.81, 117.50, 124.16, 126.43, 127.34, 127.74, 128.09, 128.46, 128.63, 129.11, 137.08, 138.42, 145.81

### 3-((4-Methylbenzyl)thio)-2-phenylimidazo[1,2-a]pyridine (2c)<sup>2</sup>

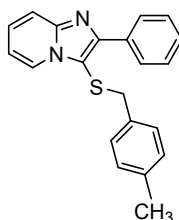

Eluent: petroleum ether/ethyl acetate (17:3), Brown oil, 67% yield (111.0 mg).

$^1\text{H}$ NMR (400 MHz,  $\text{CDCl}_3$ ):  $\delta$  (in ppm) 3.8(s,2H), 6.73-6.81(m,3H), 6.87(d, $J$ =7.6Hz,2H), 7.25-7.30(m,1H), 7.41(d, $J$ =7.6Hz,1H), 7.45-7.48(m,2H), 7.67-7.72(m,1H), 8.13-8.15 (m, 1H), 8.22-8.25 (m, 2H);

$^{13}\text{C}$  NMR (100 MHz,  $\text{CDCl}_3$ ):  $\delta$  (in ppm) 20.9, 40.2, 109.8, 112.6, 116.9, 124.3, 126.5, 127.5, 128.3, 128.4, 128.5, 129, 132.9, 133.7, 137.1, 145.8, 149.3

### 3-((4-Methylbenzyl)thio)-2-(p-tolyl)imidazo[1,2-a]pyridine (2d)

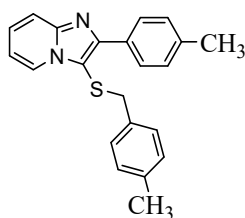

Eluent: petroleum ether/ethyl acetate (17:3), Yellow oil, 65% yield (111.0 mg).

$^1\text{H}$  NMR (400 MHz,  $\text{CDCl}_3$ ):  $\delta$  (in ppm) 2.23(s,3H), 2.44(s,3H), 3.80(s,2H), 6.72-6.75(m,1H), 6.81-6.89(m,4H), 7.25-7.30 (m, 4H), 7.71(d, $J$ =8.8Hz,1H), 8.10-8.17 (m, 3H);

$^{13}\text{C}$  NMR (100 MHz,  $\text{CDCl}_3$ ):  $\delta$  (in ppm) 20.95, 21.45, 40.28, 110.13, 113.43, 116.17, 124.44, 127.38, 127.89, 128.26, 128.53, 129.19, 129.27, 133.57, 137.37, 139.19, 144.54, 147.48

HRMS calculated for  $\text{C}_{22}\text{H}_{20}\text{N}_2\text{S}^+$   $[\text{M}+\text{H}]^+$ : 345.1427; found 345.1423

### 3-(Benzylthio)-2-(3-nitrophenyl)imidazo[1,2-a]pyridine (2e)

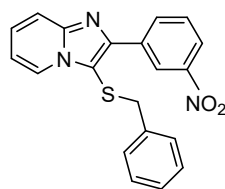

Eluent: petroleum ether/ethyl acetate (17:3), Yellow oil, 74% yield (133.0 mg).

$^1\text{H}$  NMR (400 MHz,  $\text{CDCl}_3$ ):  $\delta$  (in ppm) 3.83 (s,2H), 6.81-6.91(m,3H), 6.97-7.02(m,3H), 7.34-7.38(m,2H), 7.56(t, $J$ =8Hz,1H), 7.75(d, $J$ =8.8Hz,1H), 8.16-8.26(m,2H), 8.46(d, $J$ =7.6Hz,1H), 9.08(s,1H);

$^{13}\text{C}$  NMR (100 MHz,  $\text{CDCl}_3$ ):  $\delta$  (in ppm) 40.2, 113.6, 117.2, 117.5, 122.9, 123, 124.4, 127.5, 127.7, 128.8, 128.5, 128.7, 129.2, 134, 136.3, 145.9, 148.2

### 3-((4-Methylbenzyl) thio)-2-(3-nitrophenyl) imidazo [1,2-a] pyridine (2f)

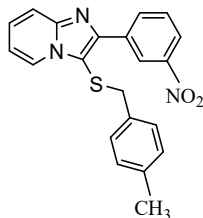

Eluent: petroleum ether/ethyl acetate (17:3), Yellow oil, 72% yield (135.0 mg).

$^1\text{H}$  NMR (400 MHz,  $\text{CDCl}_3$ ):  $\delta$  (in ppm) 2.14 (s, 3H), 3.79 (s, 2H), 6.67 (d,  $J=8\text{Hz}$ , 2H), 6.78 (d,  $J=8\text{Hz}$ , 2H), 6.92 (t,  $J=6\text{Hz}$ , 1H), 7.26 (s, 1H), 7.39 (t,  $J=7.6\text{Hz}$ , 1H), 7.54 (t,  $J=8\text{Hz}$ , 1H), 7.78 (d,  $J=9.2\text{Hz}$ , 1H), 8.15-8.18 (m, 1H), 8.32 (d,  $J=6.8\text{Hz}$ , 1H), 8.43 (d,  $J=7.6\text{Hz}$ , 1H), 9.05 (s, 1H);

$^{13}\text{C}$  NMR (100 MHz,  $\text{CDCl}_3$ ):  $\delta$  (in ppm) 20.8, 39.9, 109.9, 111, 113.9, 116.9, 122.9, 123, 124.5, 128.2, 128.6, 128.9, 129.1, 129.2, 134.1, 137.4, 145.4, 146.1, 148.1

HRMS calculated for  $\text{C}_{21}\text{H}_{17}\text{N}_3\text{O}_2\text{S}^+$   $[\text{M}+\text{H}]^+$ : 376.1120; found 376.1112

### 2-(4-Chlorophenyl)-3-((4-methylbenzyl)thio)imidazo[1,2-a]pyridine (2g)

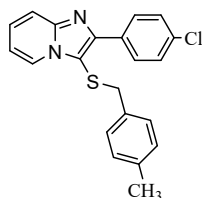

Eluent: petroleum ether/ethyl acetate (17:3), Yellow solid, 74% yield (135.0 mg).

$^1\text{H}$  NMR (400 MHz,  $\text{CDCl}_3$ ):  $\delta$  (in ppm) 2.22 (s, 3H), 3.79 (s, 2H), 6.74-6.87 (m, 5H), 7.28-7.33 (m, 1H), 7.56 (d,  $J=8\text{Hz}$ , 2H), 7.70 (s, 1H), 8.08 (d,  $J=8.4\text{Hz}$ , 2H), 8.19 (d,  $J=6.8\text{Hz}$ , 1H);

$^{13}\text{C}$  NMR (100 MHz,  $\text{CDCl}_3$ ):  $\delta$  (in ppm) 20.9, 40, 112.5, 117.2, 124.4, 126.2, 126.9, 128.3, 129, 129.1, 129.3, 132.2, 133.6, 134, 137.2, 137.9

HRMS calculated for  $\text{C}_{21}\text{H}_{17}\text{ClN}_2\text{S}^+$   $[\text{M}+\text{H}]^+$ : 365.0879; found 365.0872

### 3-(Benzylthio)-2-(4-bromophenyl) imidazo [1,2-a] pyridine (2h)

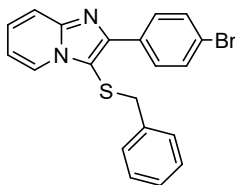



Eluent: petroleum ether/ethyl acetate (17:3), Yellow oil, 73% yield (143.0 mg).

<sup>1</sup>H NMR (400 MHz, CDCl<sub>3</sub>): δ (in ppm) 3.79(s,2H), 6.72(t,*J*=6.8 Hz,1H), 6.85-6.87(m,2H), 7.02-7.09(m,3H), 7.24-7.36(m,2H), 7.54-7.55(m,2H), 8.09-8.11(m, 3H);

<sup>13</sup>C NMR (100 MHz, CDCl<sub>3</sub>): δ (in ppm) 40.3, 112.5, 117.2, 122.5, 124.3, 126.3, 126.9, 127.3, 128.4, 128.6, 129.6, 130.7, 131.3, 131.3, 131.9, 132.5, 136.8

HRMS calculated for C<sub>20</sub>H<sub>15</sub>BrN<sub>2</sub>S<sup>+</sup>[M+H]<sup>+</sup>: 395.0218; found 395.0220

### 2-(4-Bromophenyl)-3-((4-methylbenzyl)thio)imidazo[1,2-a]pyridine(2i)

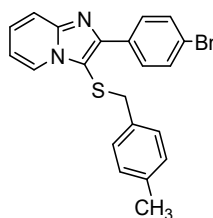

Eluent: petroleum ether/ethyl acetate (17:3), Yellow oil, 69 % yield (140.0 mg).

<sup>1</sup>H NMR (400 MHz, CDCl<sub>3</sub>): δ (in ppm) 2.23 (s,3H), 3.78 (s,2H), 6.75-6.86 (m,5H), 7.29-7.33 (m,1H), 7.56 (d, *J*=8Hz,2H), 7.70 (s,1H) 8.04 (d, *J*=8.4Hz,2H), 8.19(d, *J*=6.8Hz, 1H);

<sup>13</sup>C NMR (100 MHz, CDCl<sub>3</sub>): δ (in ppm) 20.97, 40.12, 109.82, 113.19, 116.80, 122.98, 124.42, 127.35, 128.54, 129.14, 129.83, 131.45, 133.44, 137.40, 145.46, 152.10

### 3-(Allylthio)-2-phenylimidazo[1,2-a]pyridine (2j)

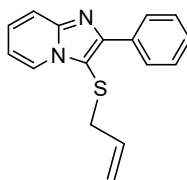

Eluent: petroleum ether/ethyl acetate (17:3), Yellow oil, 69% yield (89.0 mg).

<sup>1</sup>H NMR (400 MHz, CDCl<sub>3</sub>): δ (in ppm) 3.31(d, *J*=8.4Hz,2H), 4.76-4.82 (m, 2H), 5.67-5.78 (m,1H), 7.02 (t, *J*=8Hz,1H), 7.41-7.44 (m,1H), 7.46-7.50 (m,2H), 7.58-7.63 (m,1H), 7.91(d, *J*=8.4Hz, 1H), 8.11-8.13 (m,2H), 8.27-8.29 (m,1H), 8.57 (d, *J*=6.8Hz, 1H);

<sup>13</sup>C NMR (100 MHz, CDCl<sub>3</sub>): δ (in ppm) 39.13, 113.45, 117.30, 118.87, 124.74, 127.37, 128.54, 128.58, 128.65, 128.76, 128.81, 130.25, 132.75, 133.57

### 3-(Allylthio)-2-(4-bromophenyl)imidazo[1,2-a]pyridine (2k)

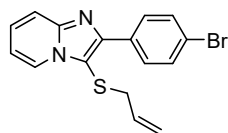

Eluent: petroleum ether/ethyl acetate (17:3), Yellow oil, 65% yield (111.0 mg).

$^1\text{H}$  NMR (400 MHz,  $\text{CDCl}_3$ ):  $\delta$  (in ppm) 3.29 (d,  $J=7.2\text{Hz}$ , 2H), 4.71-4.72 (m, 2H), 5.67-5.73 (m, 1H), 6.96-6.98 (m, 1H), 7.26-7.37 (m, 2H), 7.60-7.75 (m, 3H), 8.27 (s, 2H);

$^{13}\text{C}$  NMR (100 MHz,  $\text{CDCl}_3$ ):  $\delta$  (in ppm) 38.8, 111, 113.1, 113.41, 117.2, 118.7, 122.8, 124.8, 126.7, 128.8, 129.7, 131.6, 132, 132.5

### 3-(Allylthio)-2-(p-tolyl)imidazo[1,2-a]pyridine (2l)

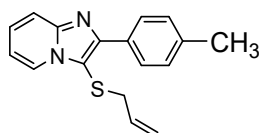

Eluent: petroleum ether/ethyl acetate (17:3), Yellow oil, 61% yield (85.0 mg).

$^1\text{H}$  NMR (400 MHz,  $\text{CDCl}_3$ ):  $\delta$  (in ppm) 2.43 (s, 3H), 3.32 (d,  $J=7.6\text{Hz}$ , 2H), 4.76-4.82 (m, 2H), 5.69-5.79 (m, 1H), 6.98-7.02 (m, 1H), 7.28-7.21 (m, 5H), 7.82 (d,  $J=8.8\text{Hz}$ , 1H), 8.04 (d,  $J=8.4\text{Hz}$ , 1H), 8.24 (d,  $J=8.4\text{Hz}$ , 2H), 8.56 (d,  $J=6.8\text{Hz}$ , 2H);

$^{13}\text{C}$  NMR (100 MHz,  $\text{CDCl}_3$ ):  $\delta$  (in ppm) 21.38, 38.94, 113.01, 113.23, 116.86, 117.49, 118.71, 123.92, 124.61, 125.07, 127.23, 127.76, 128.27, 129.23, 132.63, 138.76

### 3-((4-Isopropylbenzyl)thio)-2-(p-tolyl)imidazo[1,2-a]pyridine (2m)

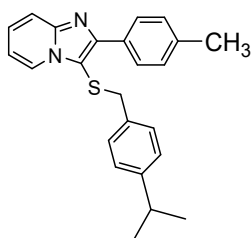

Eluent: petroleum ether/ethyl acetate (17:3), Yellow oil, 74% yield (138.0 mg).

$^1\text{H}$  NMR (400 MHz,  $\text{CDCl}_3$ ):  $\delta$  (in ppm) 1.12 (s, 3H), 1.44 (s, 3H), 2.44 (s, 3H), 2.27-2.79 (m, 1H), 3.83 (s, 2H), 6.77-6.83 (m, 3H), 6.91-6.93 (m, 2H), 7.31-7.36 (m, 4H), 8.07 (d,  $J=8\text{Hz}$ , 1H), 8.44 (d,  $J=8\text{Hz}$ , 2H);

$^{13}\text{C}$  NMR (100 MHz,  $\text{CDCl}_3$ ):  $\delta$  21.43, 22.90, 33.73, 40.35, 113.83, 117.64, 122.64, 124.47, 126.64, 128.26, 128.57, 129.47, 133.90, 140.07, 145.71, 148.56, 154.45

**5-(Benzylthio)-6-phenylimidazo [2,1-b]thiazole (2n)**

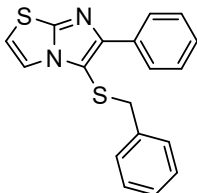

Eluent: petroleum ether/ethyl acetate (17:3), Yellow oil, 66%yield (106.0 mg).

$^1\text{H}$  NMR (400 MHz,  $\text{CDCl}_3$ ):  $\delta$  (in ppm) 3.86(s,2H), 6.69(d,  $J=4.4\text{Hz}$ ,1H), 6.92-6.99 (m,3H), 7.14-7.16(m,3H), 7.37-7.42(m,1H), 7.46-7.50(m,2H), 8.17-8.20(m,2H);

$^{13}\text{C}$  NMR (100 MHz,  $\text{CDCl}_3$ ):  $\delta$  (in ppm) 41.08, 113.17, 116.85, 118.70, 118.70, 127.69, 128.20, 128.63, 129, 129.27, 130.31, 133.38, 136.36, 147.55

**5-((4-Methylbenzyl)thio)-6-phenylimidazo[2,1-b]thiazole(2o)**

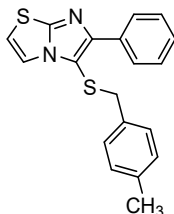

Eluent: petroleum ether/ethyl acetate (17:3), Yellow oil, 62 % yield (104.0 mg).

$^1\text{H}$ NMR (400 MHz,  $\text{CDCl}_3$ ):  $\delta$  (in ppm) 2.26 (s,3H), 3.82(s,2H), 6.71(d,  $J=4.4\text{Hz}$ ,1H), 6.86(d,  $J=7.6\text{Hz}$ ,2H), 6.94(d,  $J=7.6\text{Hz}$ ,2H), 7.99(d,  $J=4.4\text{Hz}$ ,1H), 7.39(d,  $J=7.2\text{Hz}$ ,1H), 7.59(t,  $J=7.6\text{Hz}$ ,2H), 8.15-8.17(m,2H);

$^{13}\text{C}$  NMR (100 MHz,  $\text{CDCl}_3$ ):  $\delta$  (in ppm) 21, 41.03, 113.03, 118.28, 127.44, 128.52, 128.63, 129.29, 134.05, 137.40, 149.52

HRMS calculated for  $\text{C}_{19}\text{H}_{16}\text{N}_2\text{S}_2^+$   $[\text{M}+\text{H}]^+$ : 337.0835; found 337.0759

**3-(Butylthio)-2-phenylimidazo[1,2-a]pyridine(2p)<sup>3</sup>**

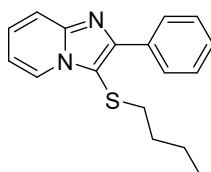

Eluent: petroleum ether/ethyl acetate (17:3), Yellow oil, 71%yield (100.0 mg).

$^1\text{H}$  NMR (400 MHz,  $\text{CDCl}_3$ ):  $\delta$  (in ppm) 0.78(t,  $J=8\text{Hz}$ , 3H), 1.27-1.31 (m,2H), 1.35-1.45 (m,2H), 2.66 (t,  $J=8\text{Hz}$ , 2H), 6.94 (t,  $J=8\text{Hz}$ , 1H), 7.30-7.32 (m,1H), 7.37-7.41 (m,1H), 7.47-7.50 (m,2H), 7.68 (d,  $J=8\text{Hz}$ , 1H), 8.32 (d,  $J=8\text{Hz}$ , 2H), 8.53 (d,  $J=8\text{Hz}$ , 1H);

$^{13}\text{C}$ NMR (100 MHz, $\text{CDCl}_3$ ):  $\delta$  (in ppm)13.6, 21.8, 31.6, 35.6,110.6, 112.7, 117.6, 124.5, 125.9, 128.3, 128.4, 134, 146.5, 149.6

### 3-(Butylthio)-2-(p-tolyl)imidazo[1,2-a]pyridine (2q)

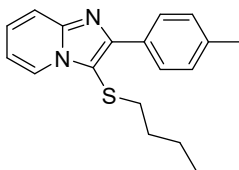

Eluent: petroleum ether/ethyl acetate (17:3), Yellow oil, 67 % yield (98.0 mg).

$^1\text{H}$ NMR (400MHz,  $\text{CDCl}_3$ ):  $\delta$  (in ppm) 0.79 (t,  $J=8\text{Hz}$ , 3H), 1.31-1.36 (m,2H), 1.41-1.46 (m,2H), 2.42 (s,3H), 2.66(t,  $J=8\text{Hz}$ , 2H), 6.91-6.94 (m,1H), 7.29-7.30 (m,3H), 7.67 (d,  $J=8\text{Hz}$ , 1H), 8.23 (d,  $J=8\text{Hz}$ ,2H),8.51-8.52 (m,1H);

$^{13}\text{C}$  NMR (100 MHz, $\text{CDCl}_3$ ):  $\delta$  (in ppm)13.6, 21.4,21.9, 31.6, 35.6,110.2, 112.6, 117.5, 124.4, 125.8, 128.3, 129.1, 131.2,138.1, 146.5, 149.7

### 2-(4-Bromophenyl)-3-(butylthio)imidazo[1,2-a]pyridine(2r)

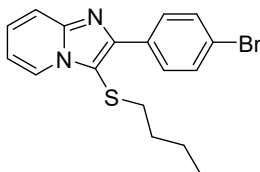

Eluent: petroleum ether/ethyl acetate (17:3), Yellow oil, 73%yield(115.0 mg).

$^1\text{H}$  NMR (400 MHz,  $\text{CDCl}_3$ ):  $\delta$  (in ppm) 0.79 (t,  $J=8\text{Hz}$ , 3H), 1.27-1.34 (m,2H), 1.39-1.46 (m,2H), 2.65 (t,  $J=8\text{Hz}$ , 2H), 6.93-6.97 (m,1H), 7.30-7.33 (m,1H), 7.37-7.41(m,1H), 7.59-7.67 (m,3H), 8.24 (d,  $J=8\text{Hz}$ , 2H), 8.51(d,  $J=8\text{Hz}$ , 1H);

$^{13}\text{C}$  NMR(100 MHz,  $\text{CDCl}_3$ ):  $\delta$  (in ppm)13.6, 21.8, 31.6, 35.6,110.7, 112.9, 117.7, 122.5, 124.5, 126.2, 129.9, 131.5,133, 146.5, 148.3

### S9. Characterization data of S,S-Dibenzyltrithiocarbonate<sup>4</sup>

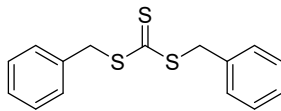

Eluent: petroleum ether, Yellow oil, 86 % yield.

FTIR (KBr):  $\nu_{\max}$  ( $\text{cm}^{-1}$ ) 1048 (C=S *str.*), 791 (C-S *str.*).

$^1\text{H}$  NMR (400MHz,  $\text{CDCl}_3$ ):  $\delta$  (in ppm) 4.64 (s, 4H), 7.27-7.38 (m, 10H);

$^{13}\text{C}$  NMR (100 MHz,  $\text{CDCl}_3$ ):  $\delta$  (in ppm) 41.6, 127.9, 128.8, 129.4, 135, 222.9



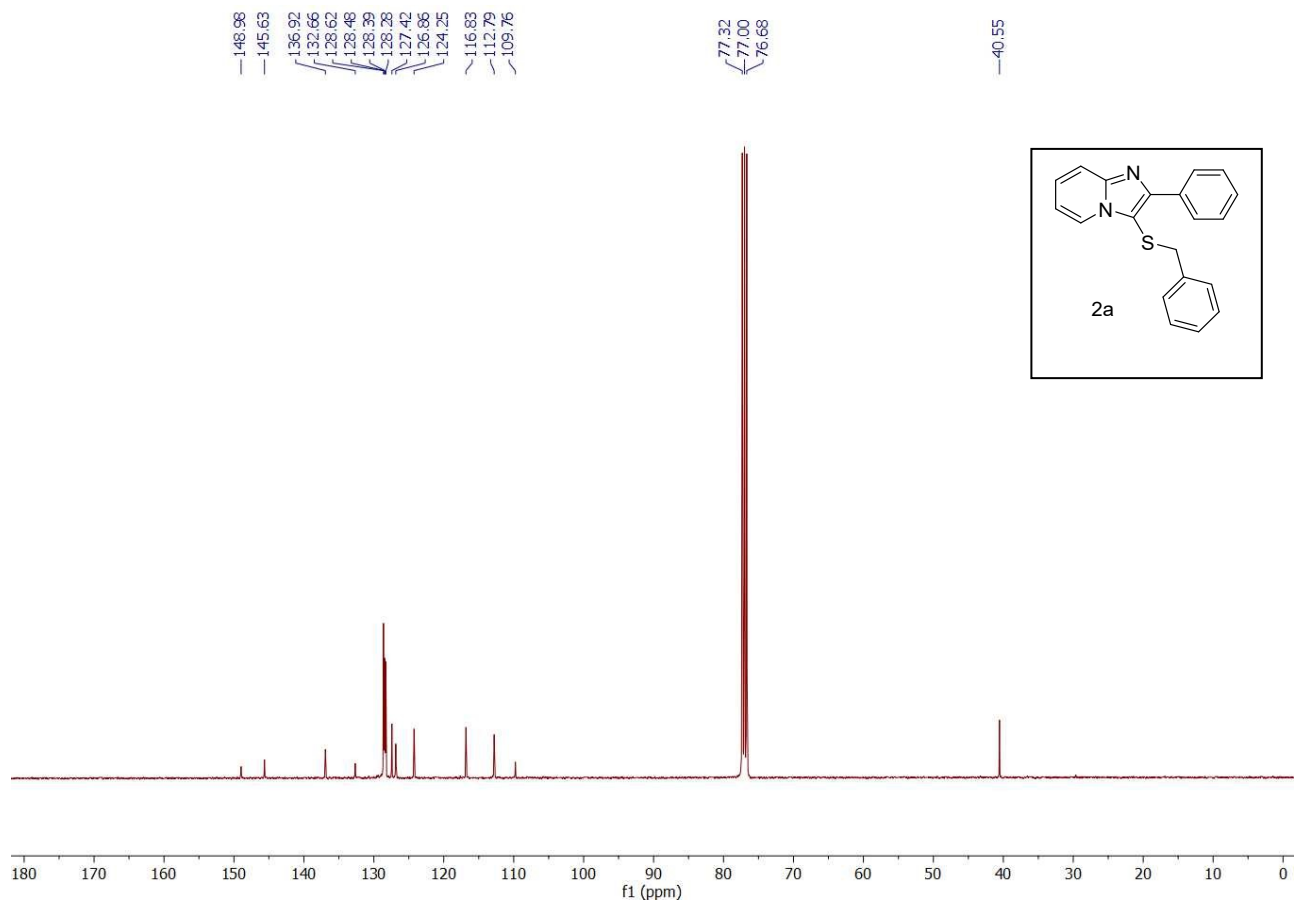

<sup>13</sup>C NMR spectra of (2a)

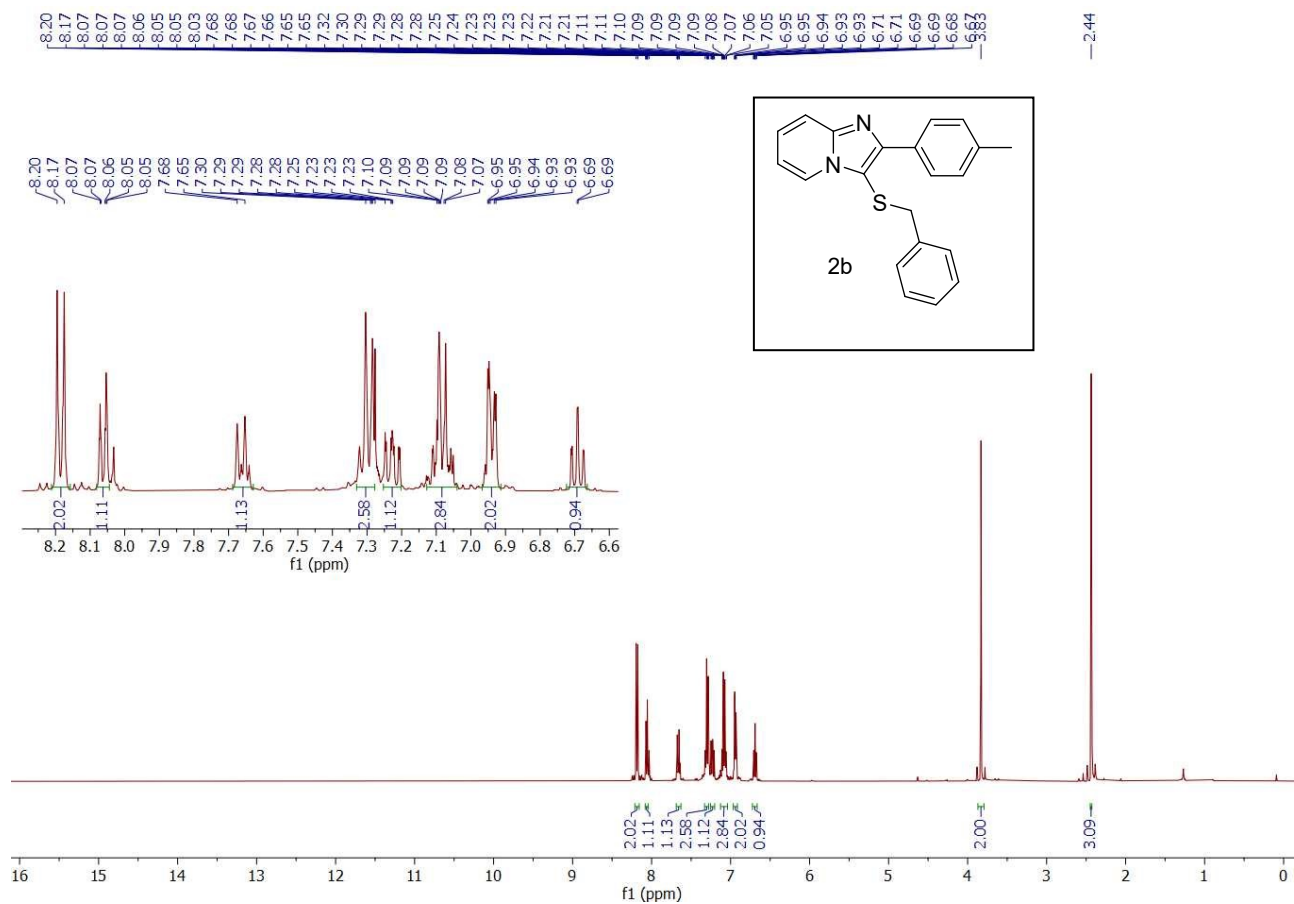

<sup>1</sup>H NMR spectra of (2b)



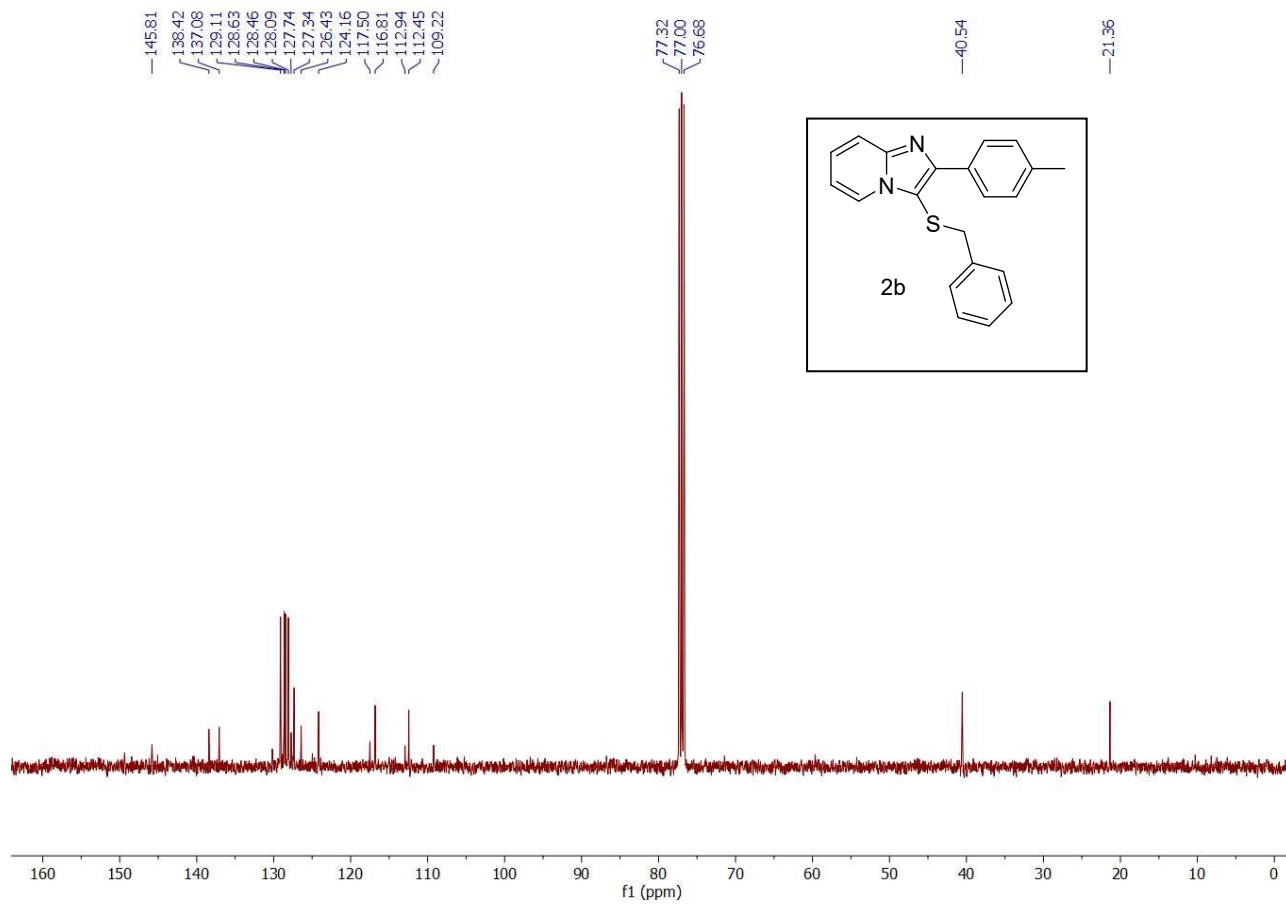

$^{13}\text{C}$  NMR spectra of (2b)

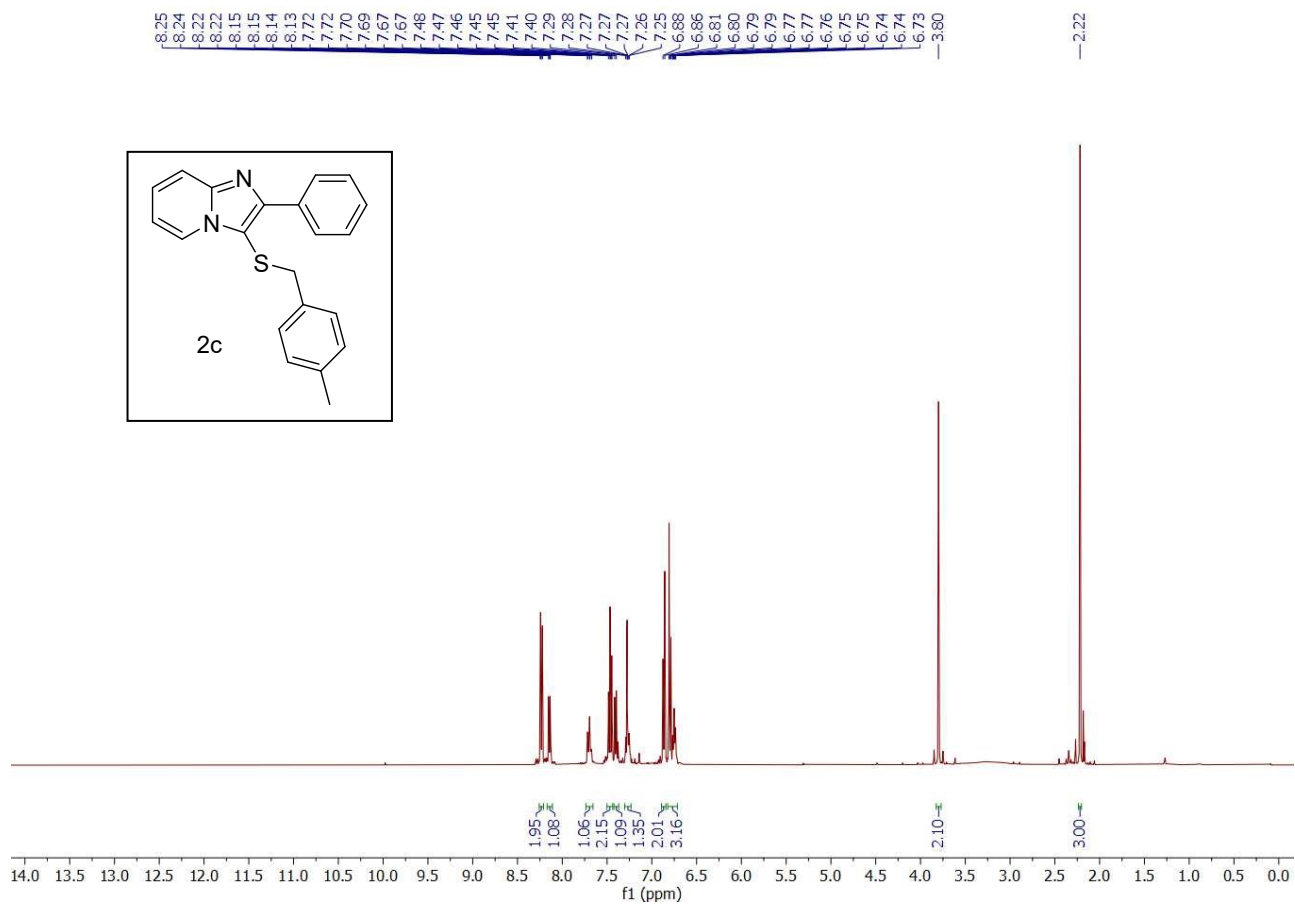

<sup>1</sup>H NMR spectra of (2c)

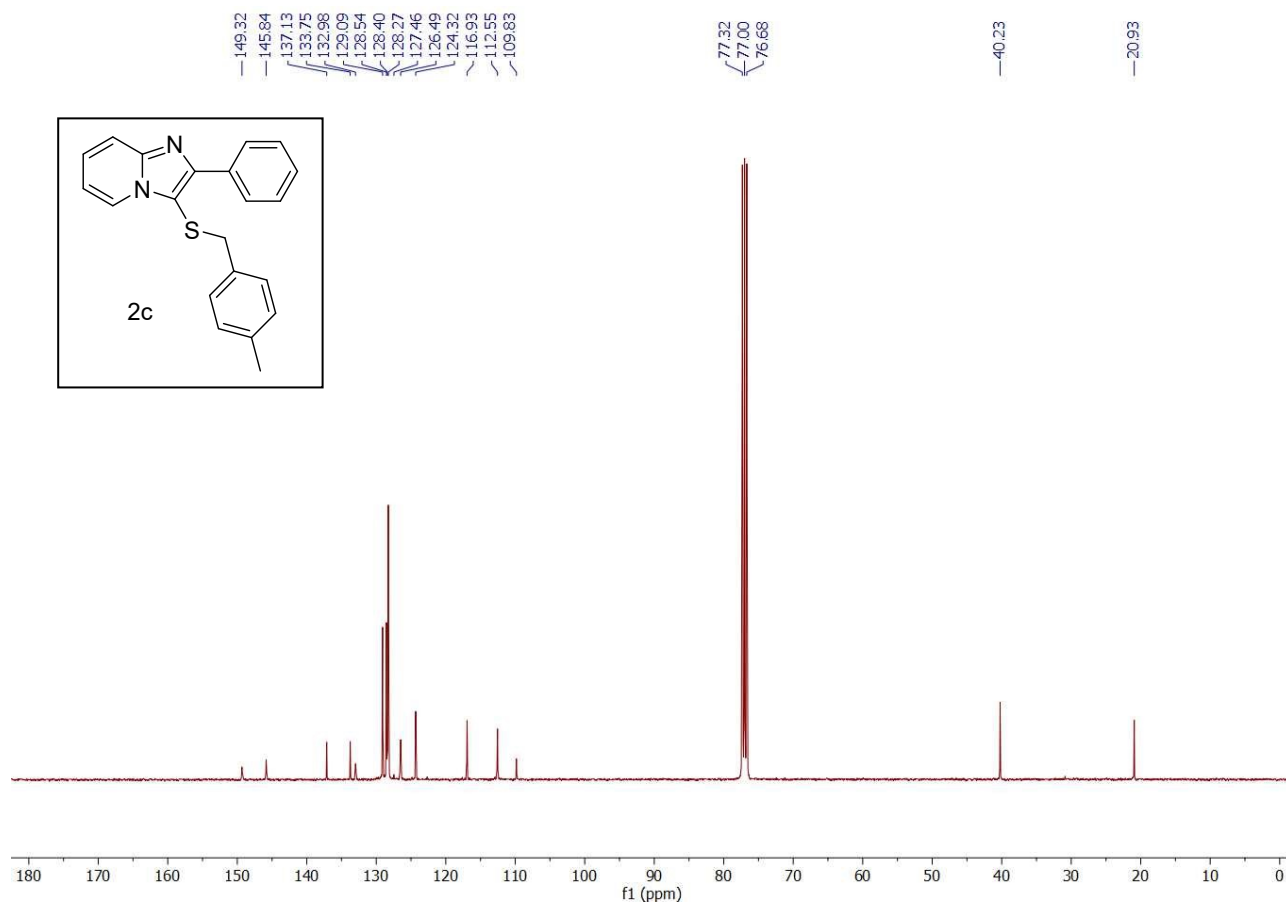

<sup>13</sup>C NMR spectra of (2c)

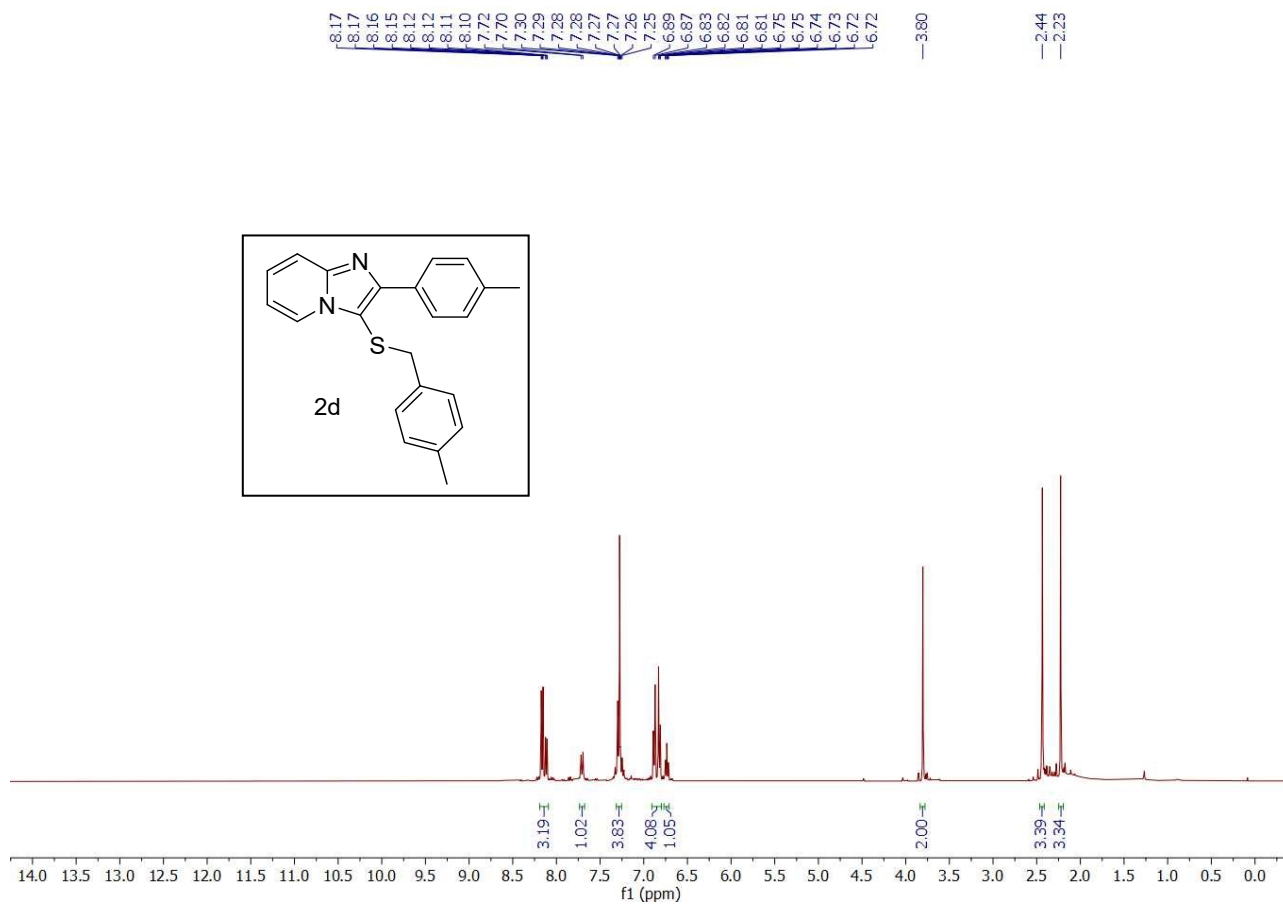

<sup>1</sup>H NMR spectra of (2d)

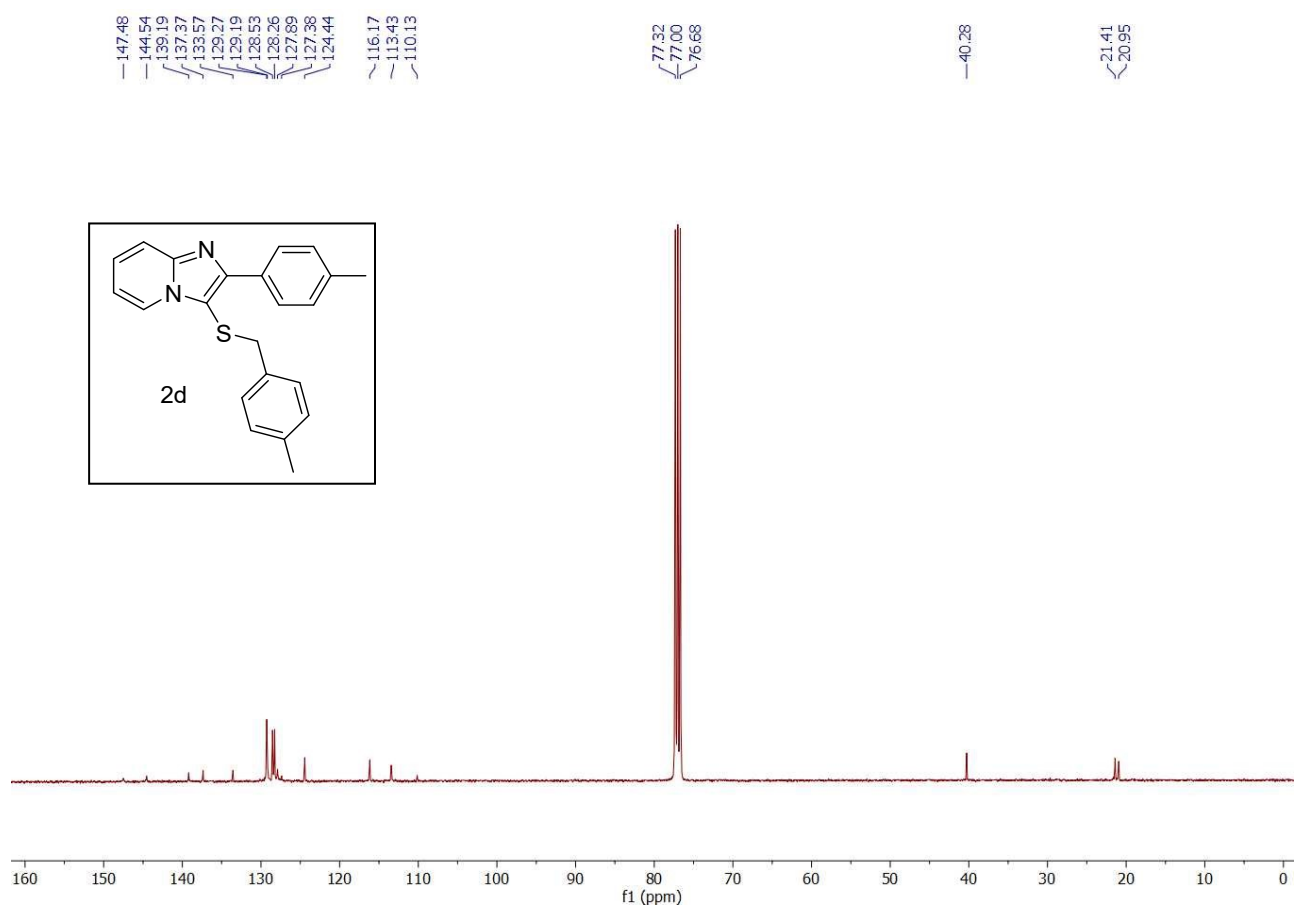

$^{13}\text{C}$  NMR spectra of (2d)

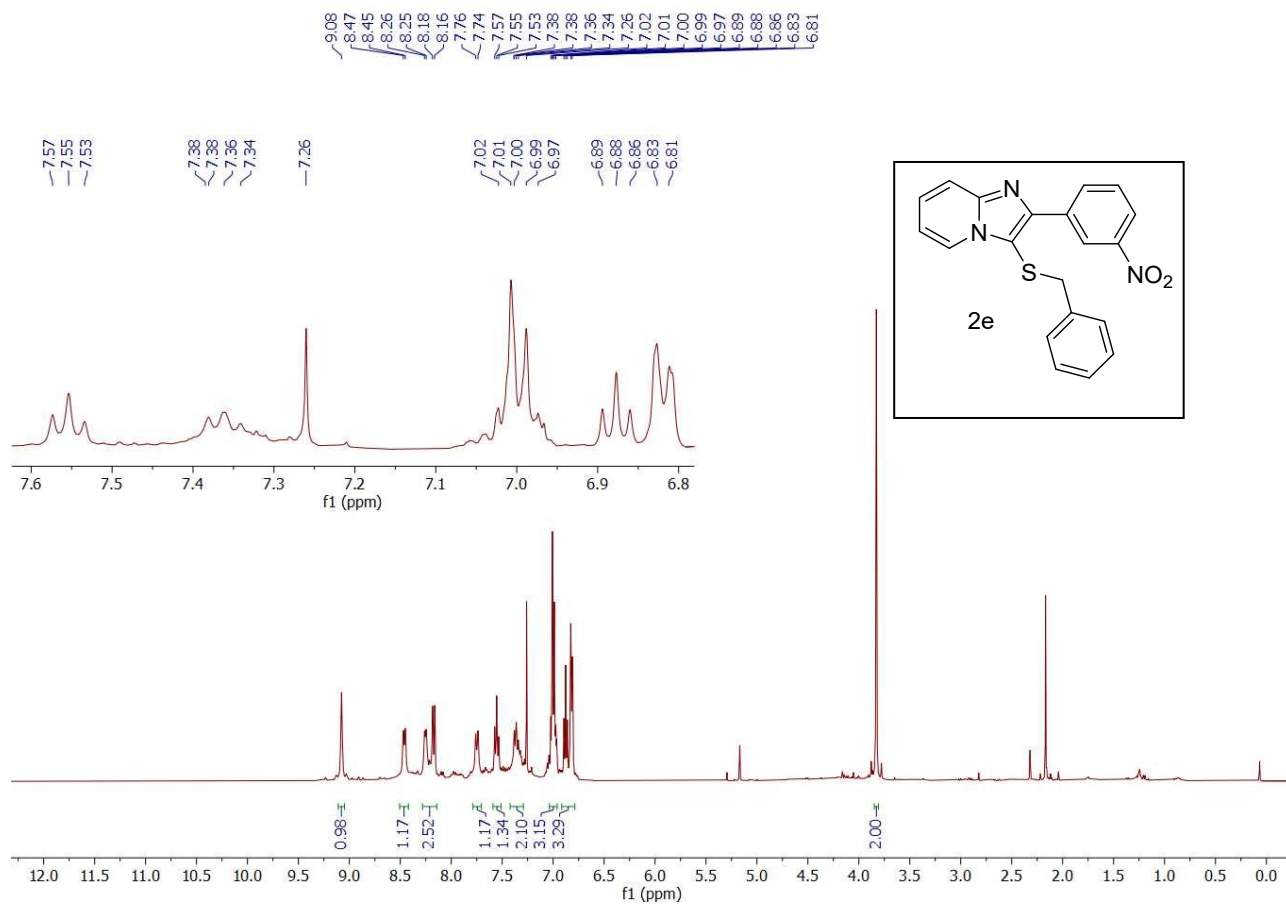

<sup>1</sup>H NMR spectra of (2e)

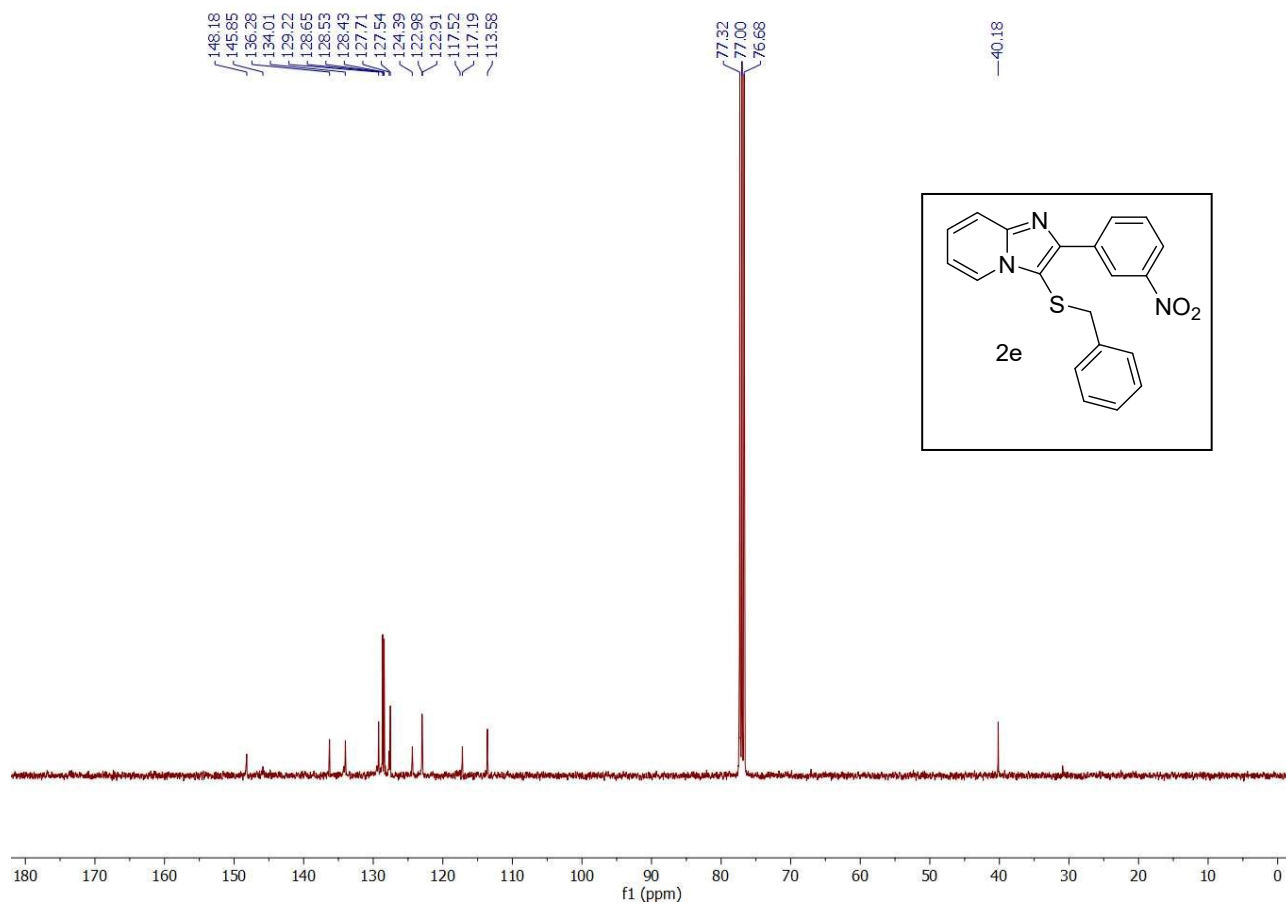

$^{13}\text{C}$  NMR spectra of (2e)

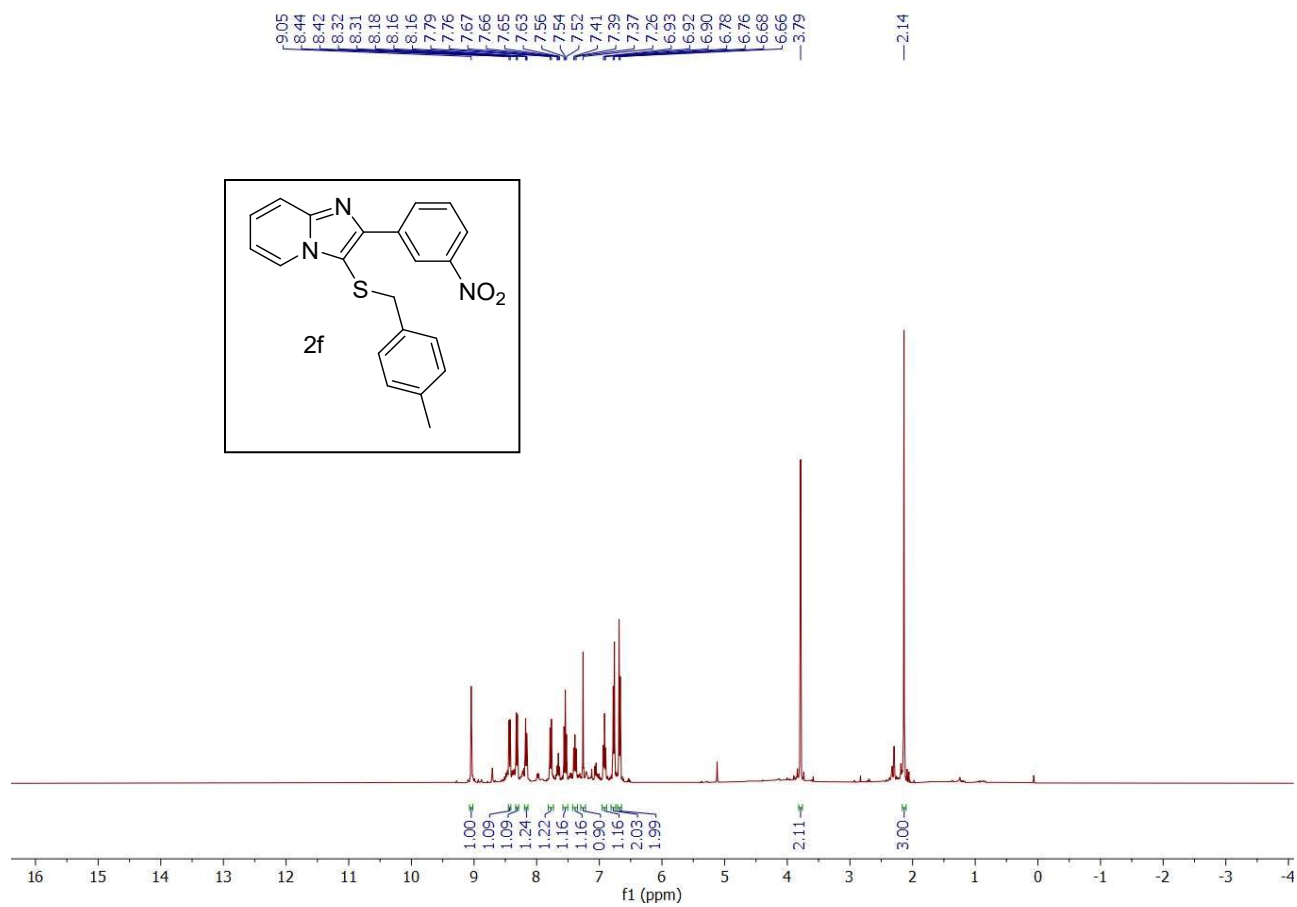

<sup>1</sup>H NMR spectra of (2f)



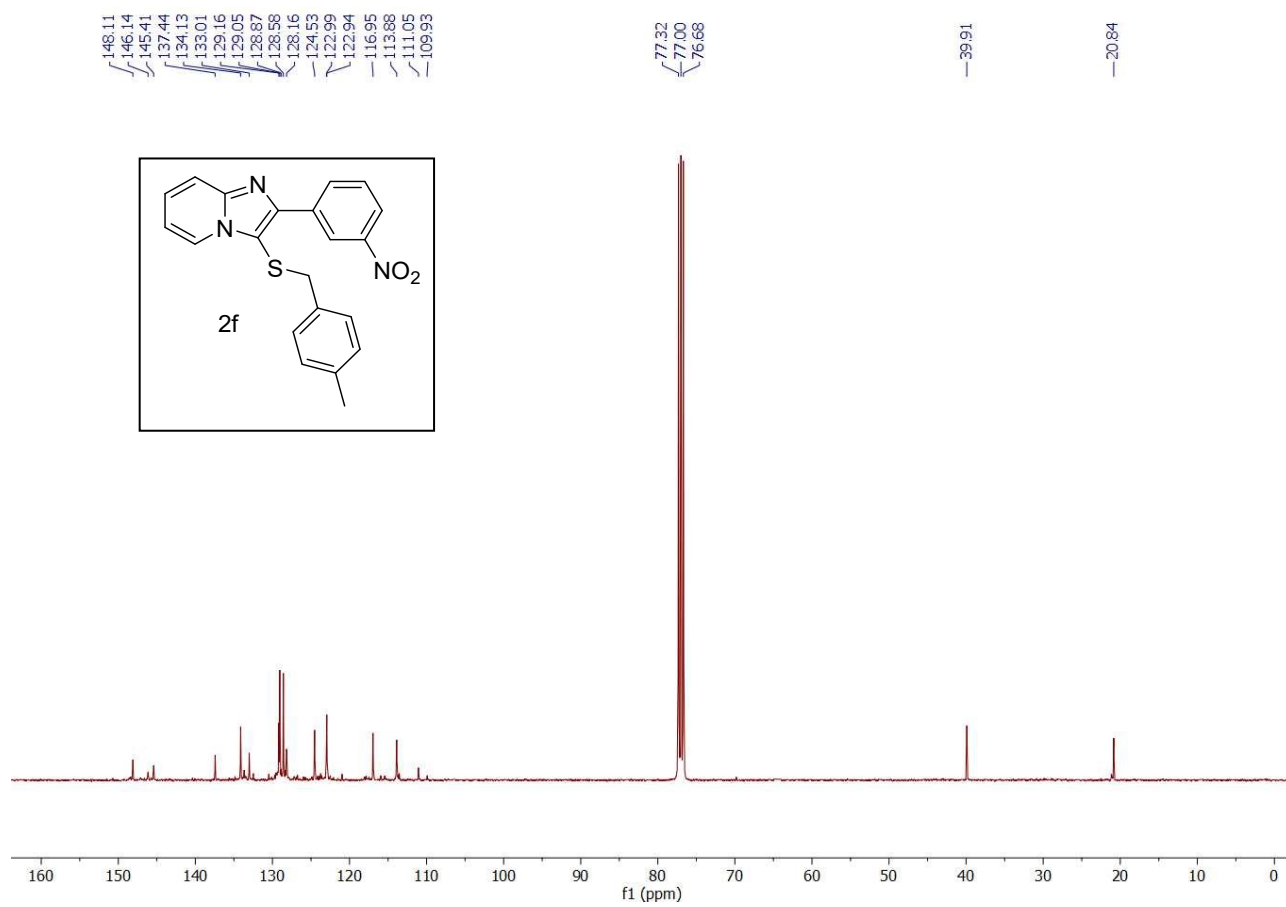

$^{13}\text{C}$  NMR spectra of (2f)

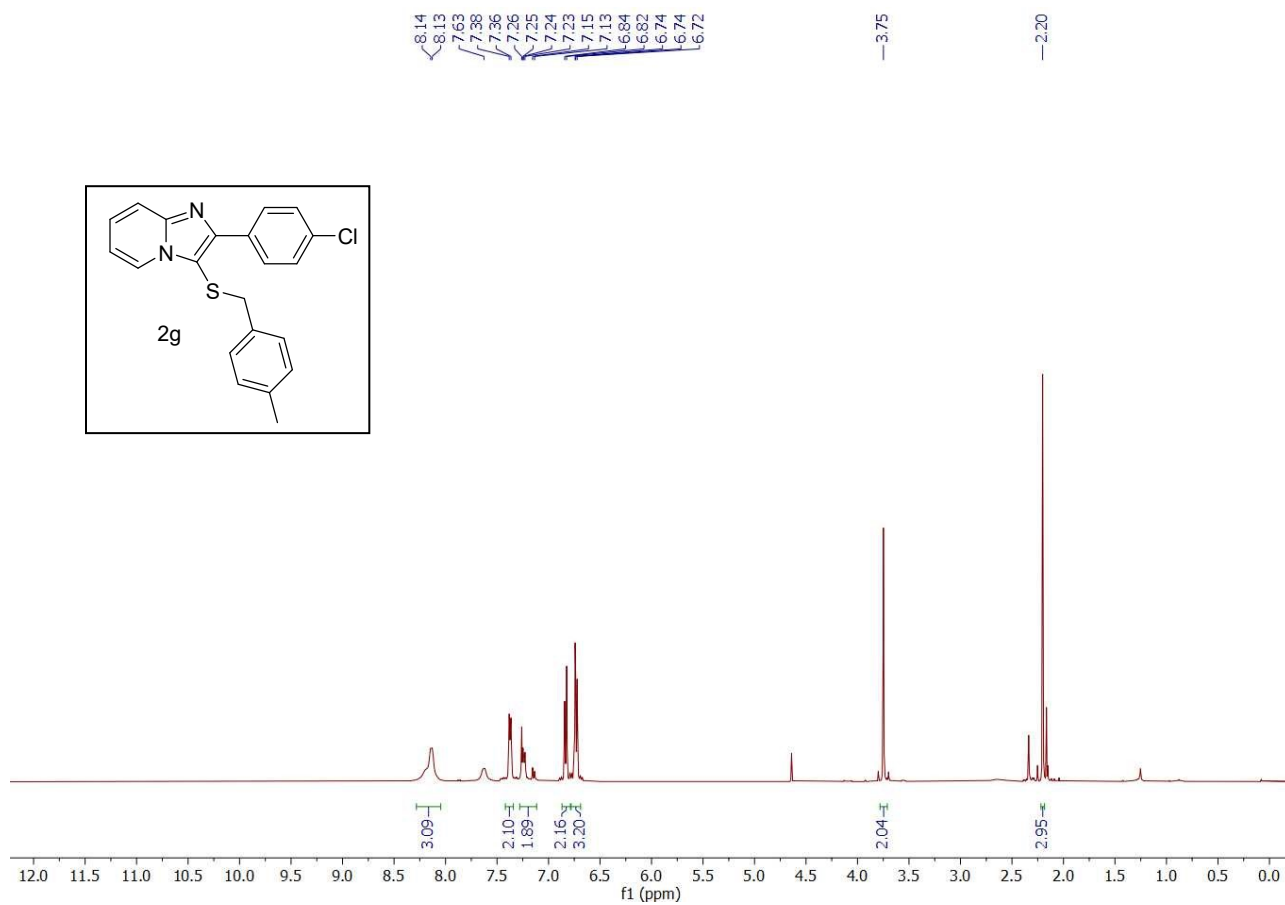

<sup>1</sup>H NMR spectra of (2g)

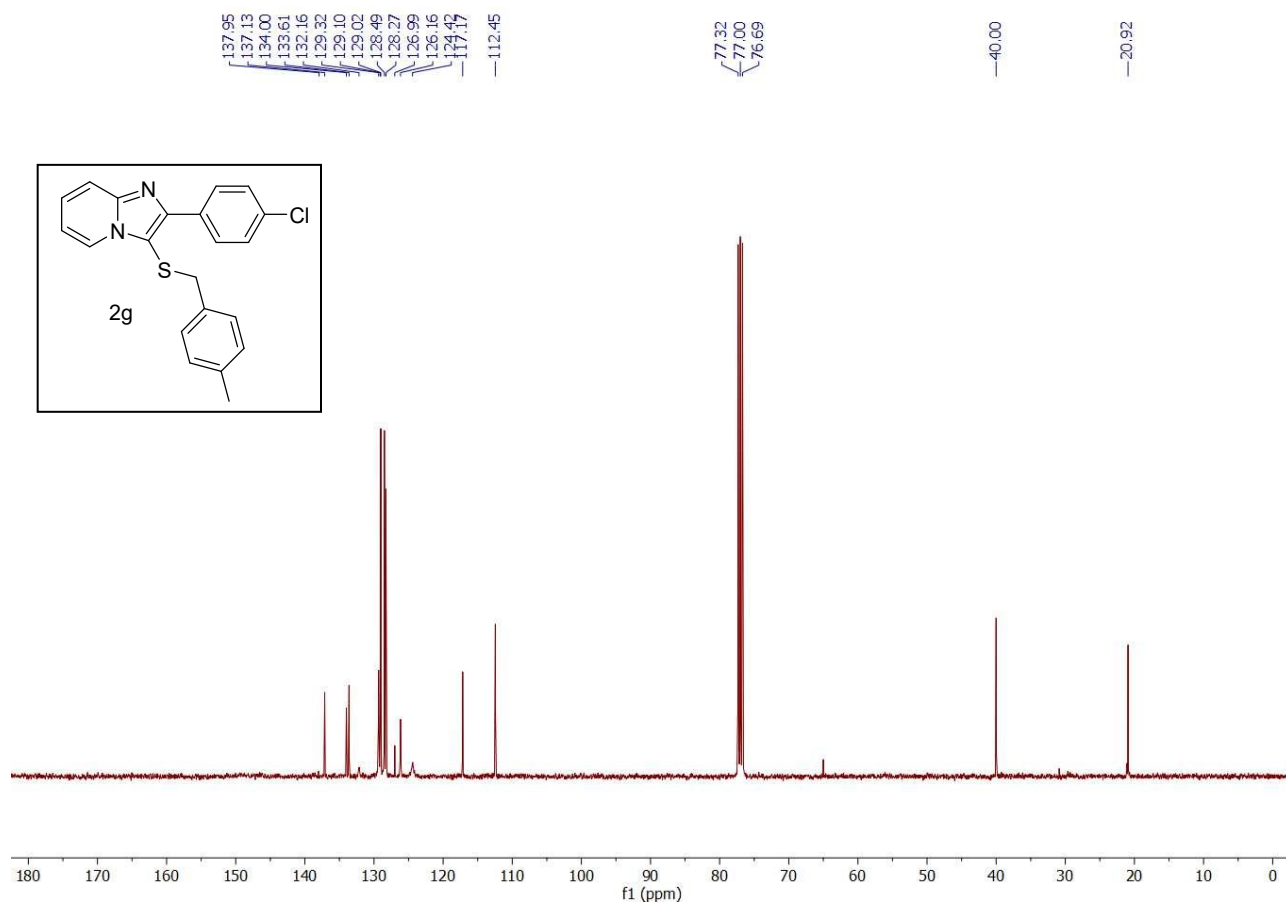

<sup>13</sup>C NMR spectra of (2g)

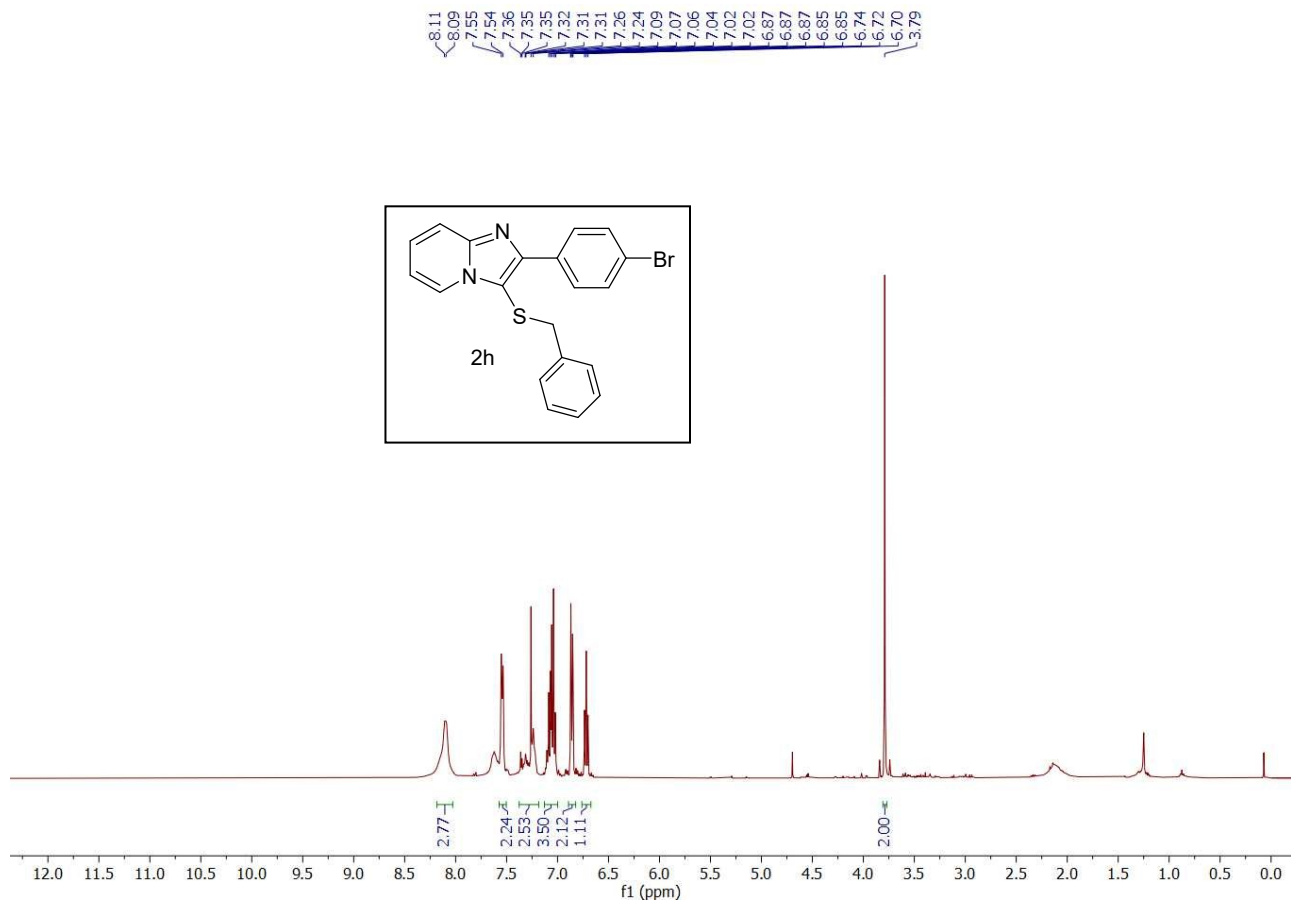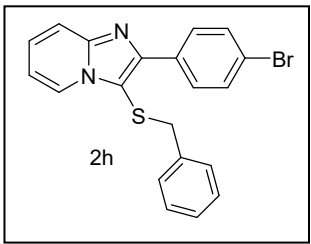

<sup>1</sup>H NMR spectra of (2h)

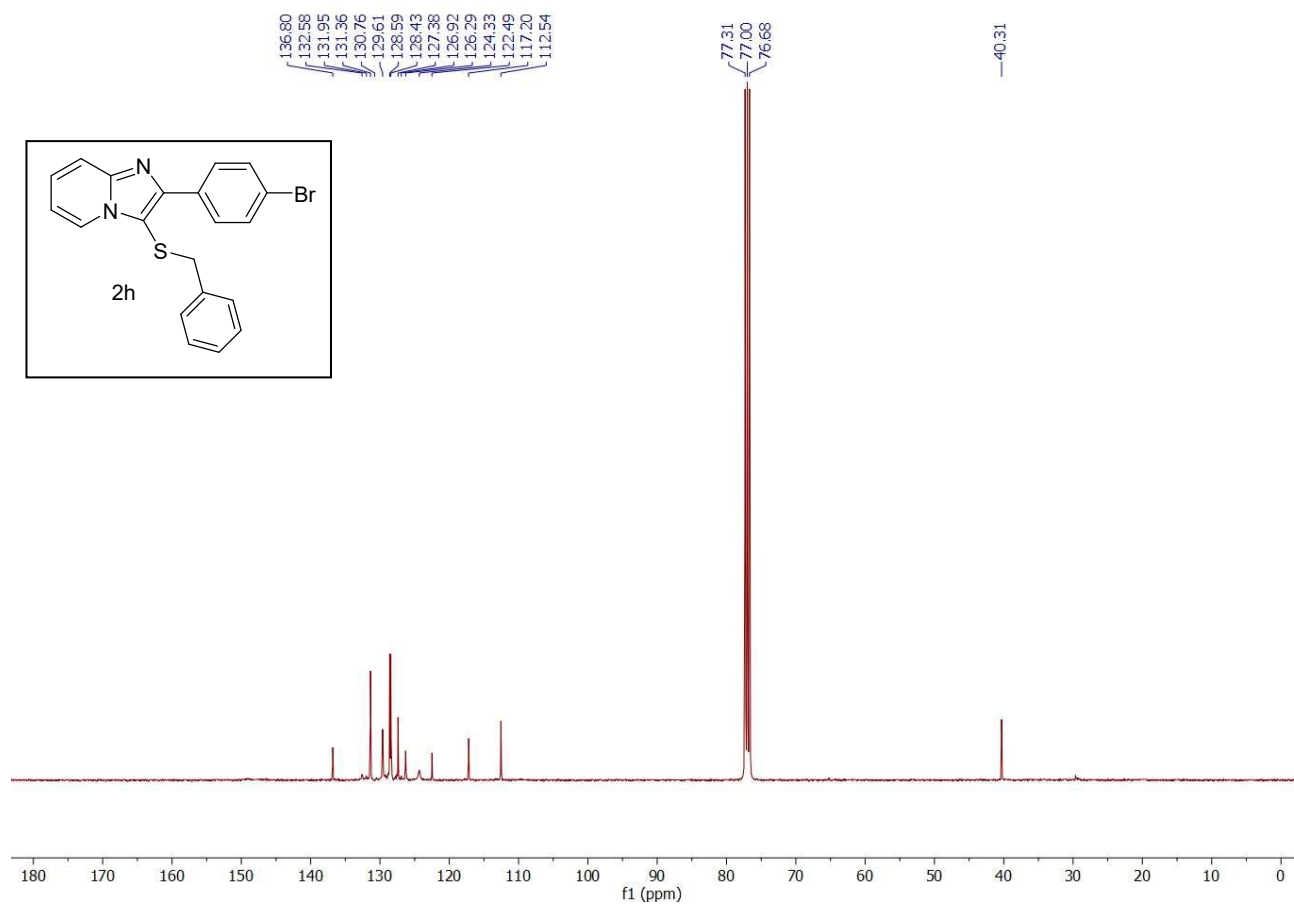

<sup>13</sup>C NMR spectra of (2h)

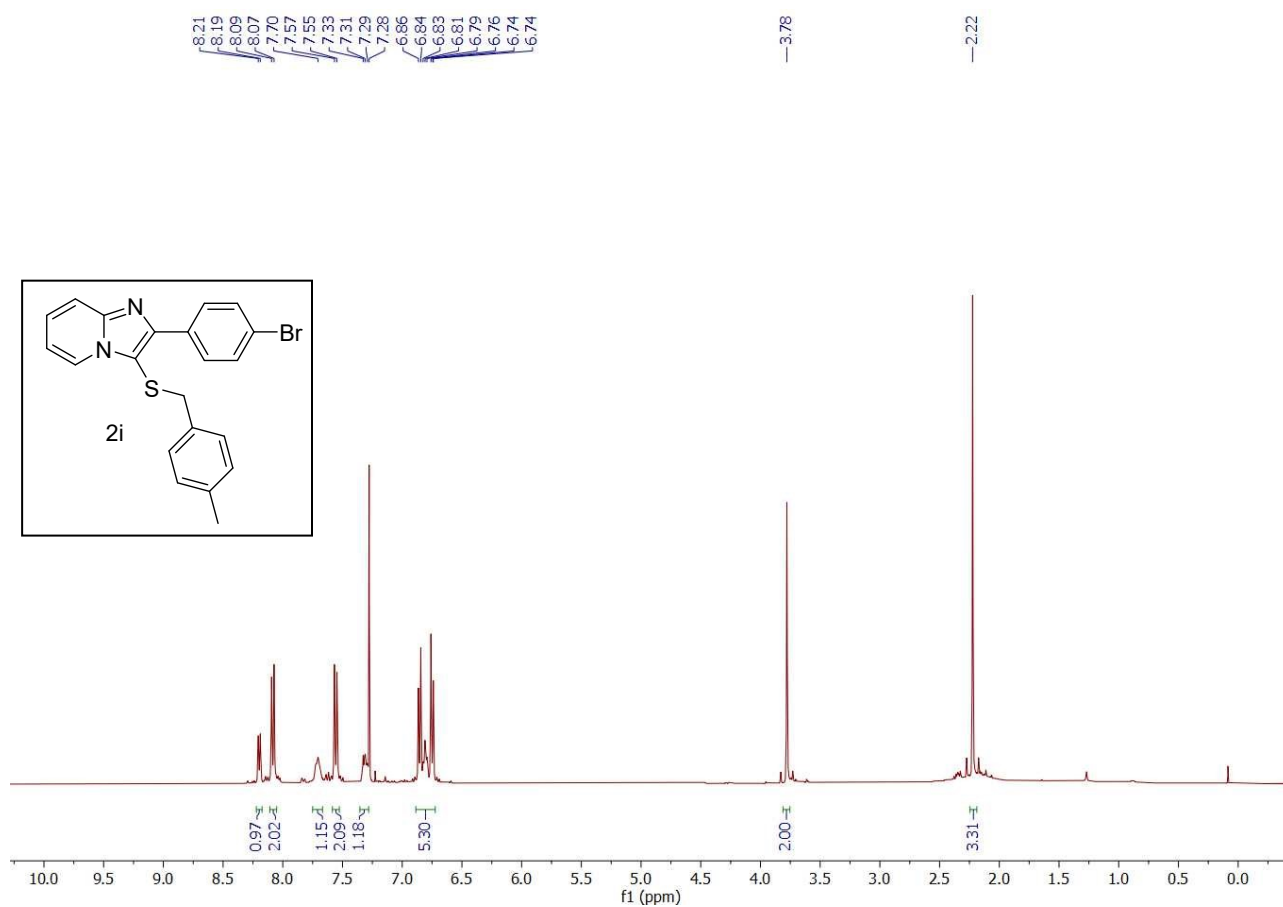

<sup>1</sup>H NMR spectra of (2i)

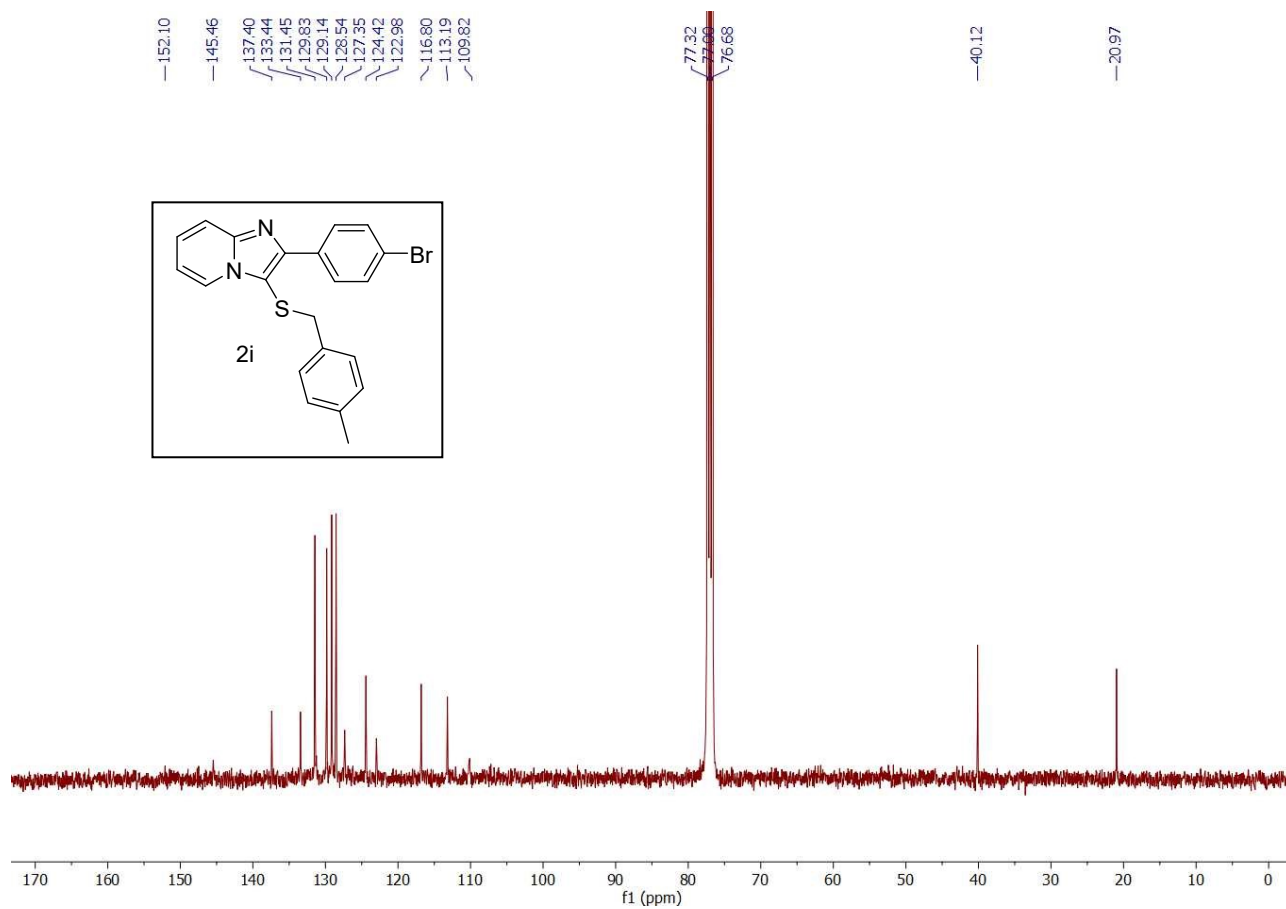

<sup>13</sup>C NMR spectra of (2i)

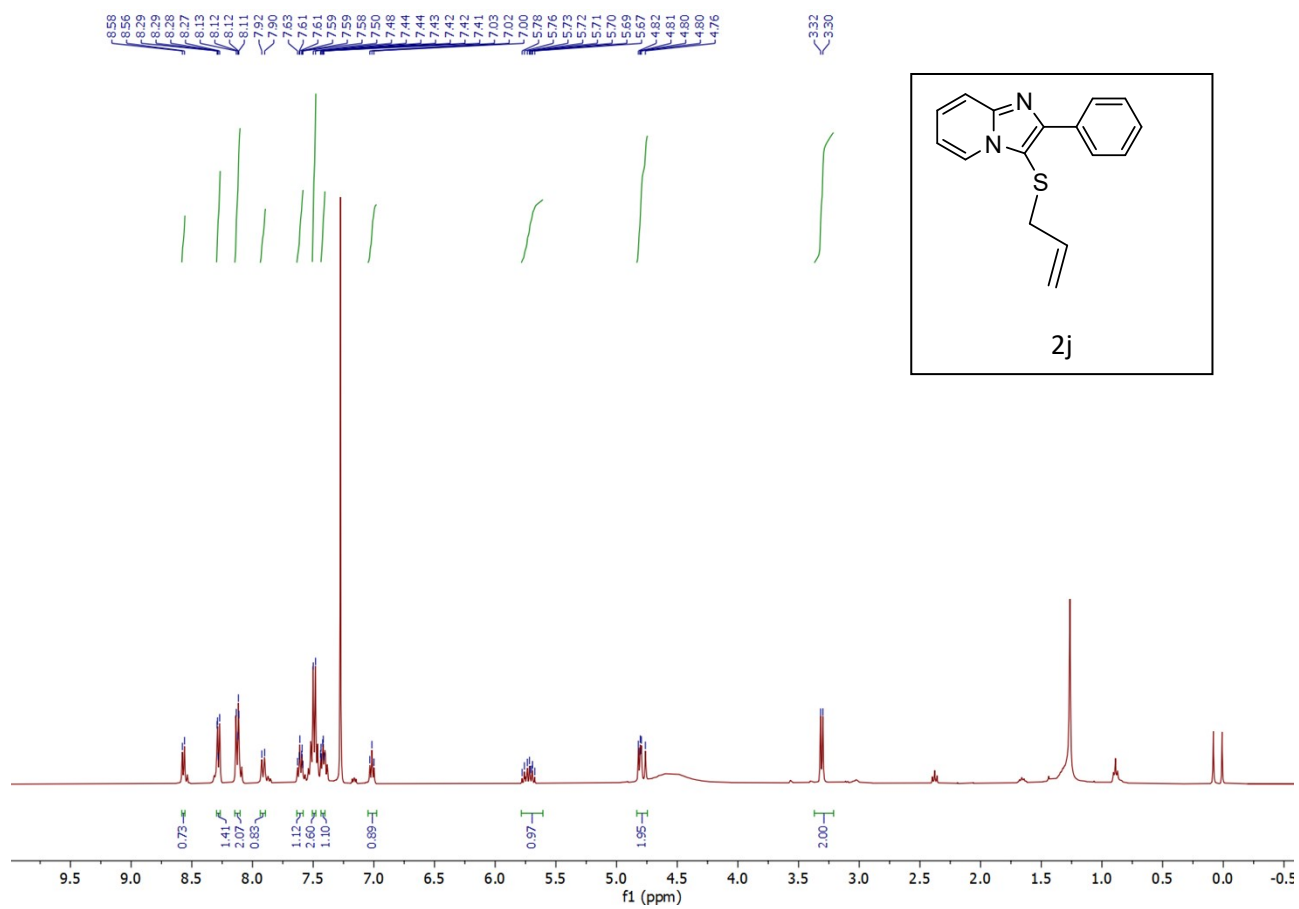

$^1\text{H}$  NMR spectra of (2j)



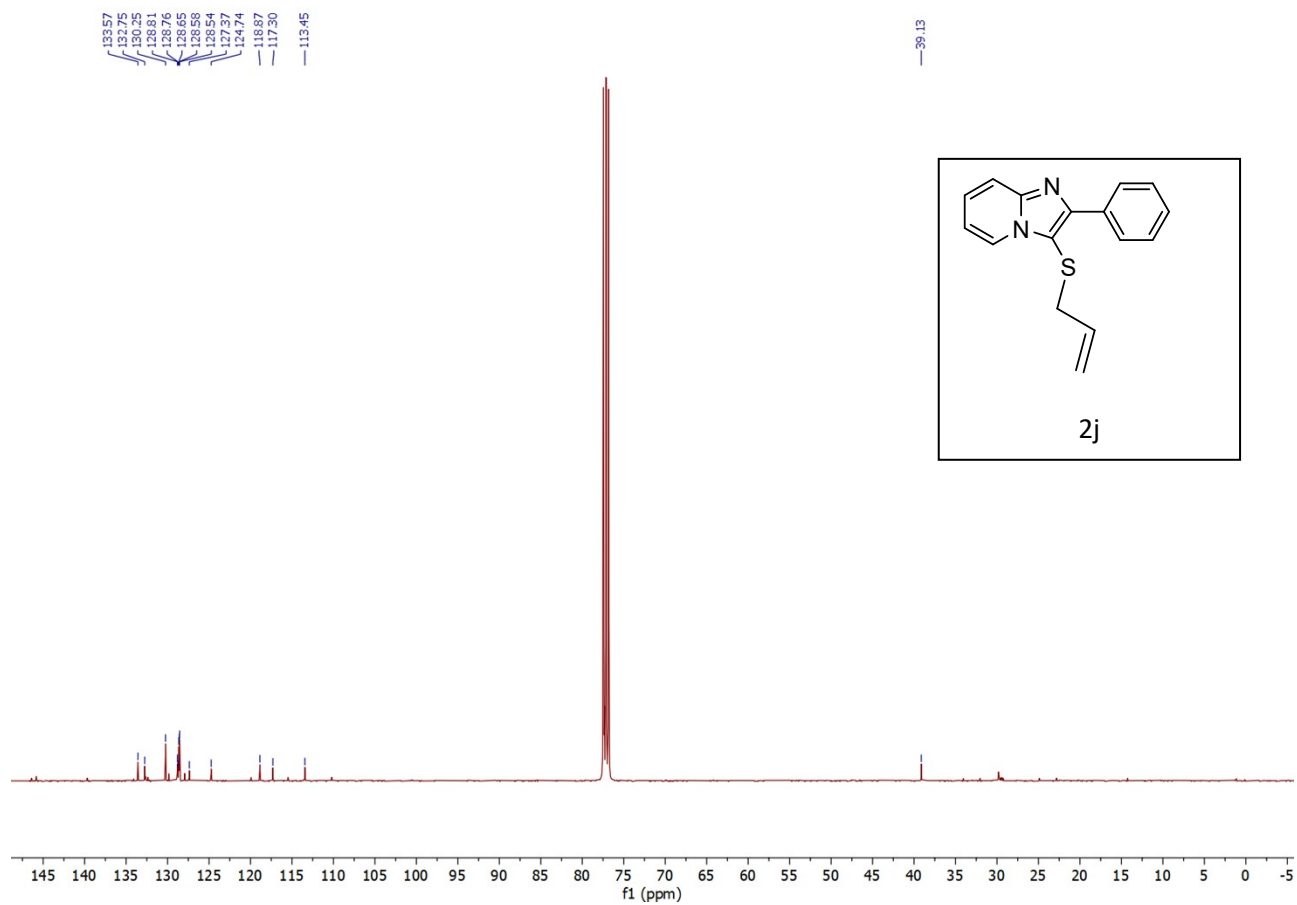

<sup>13</sup>C NMR spectra of (2j)

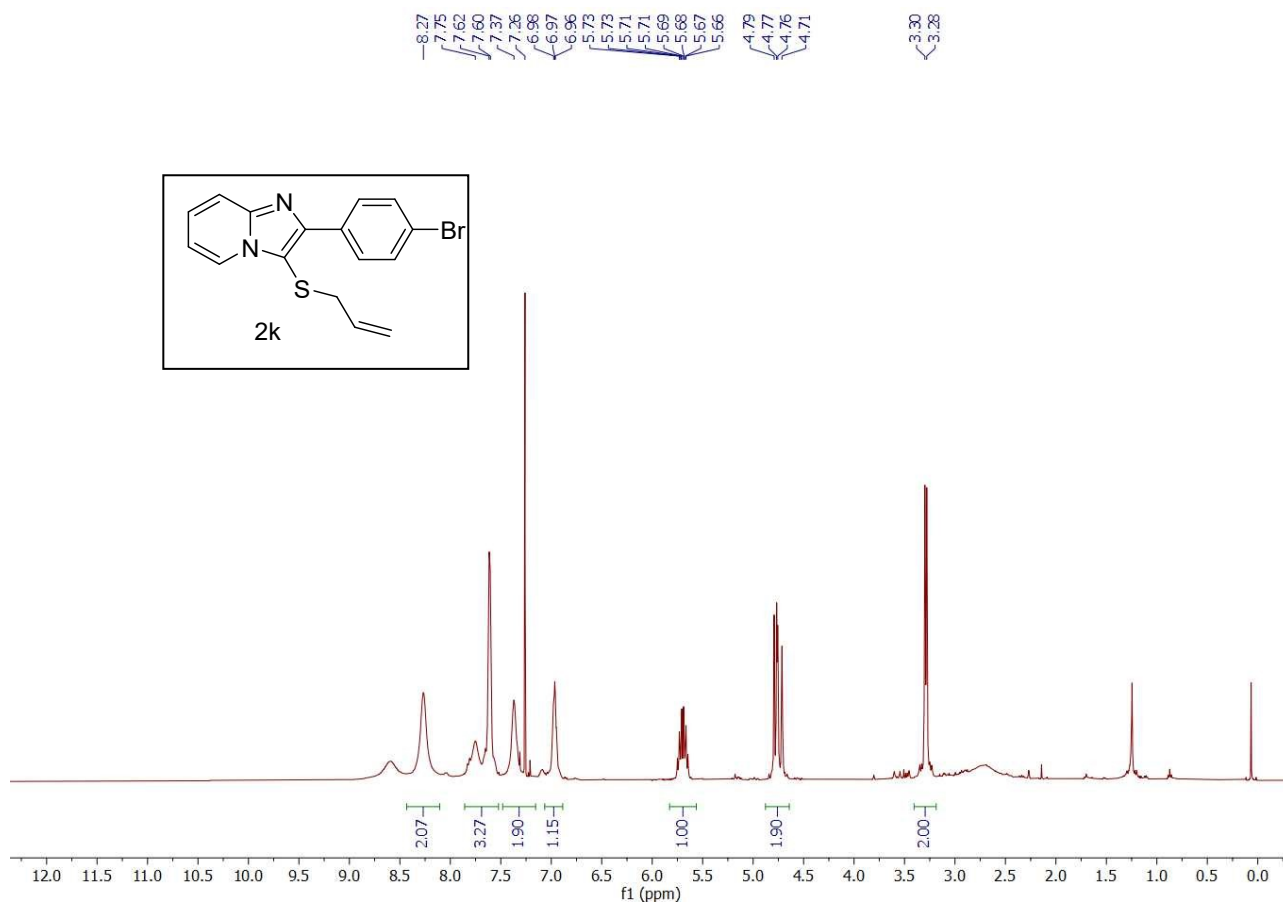

<sup>1</sup>H NMR spectra of (2k)

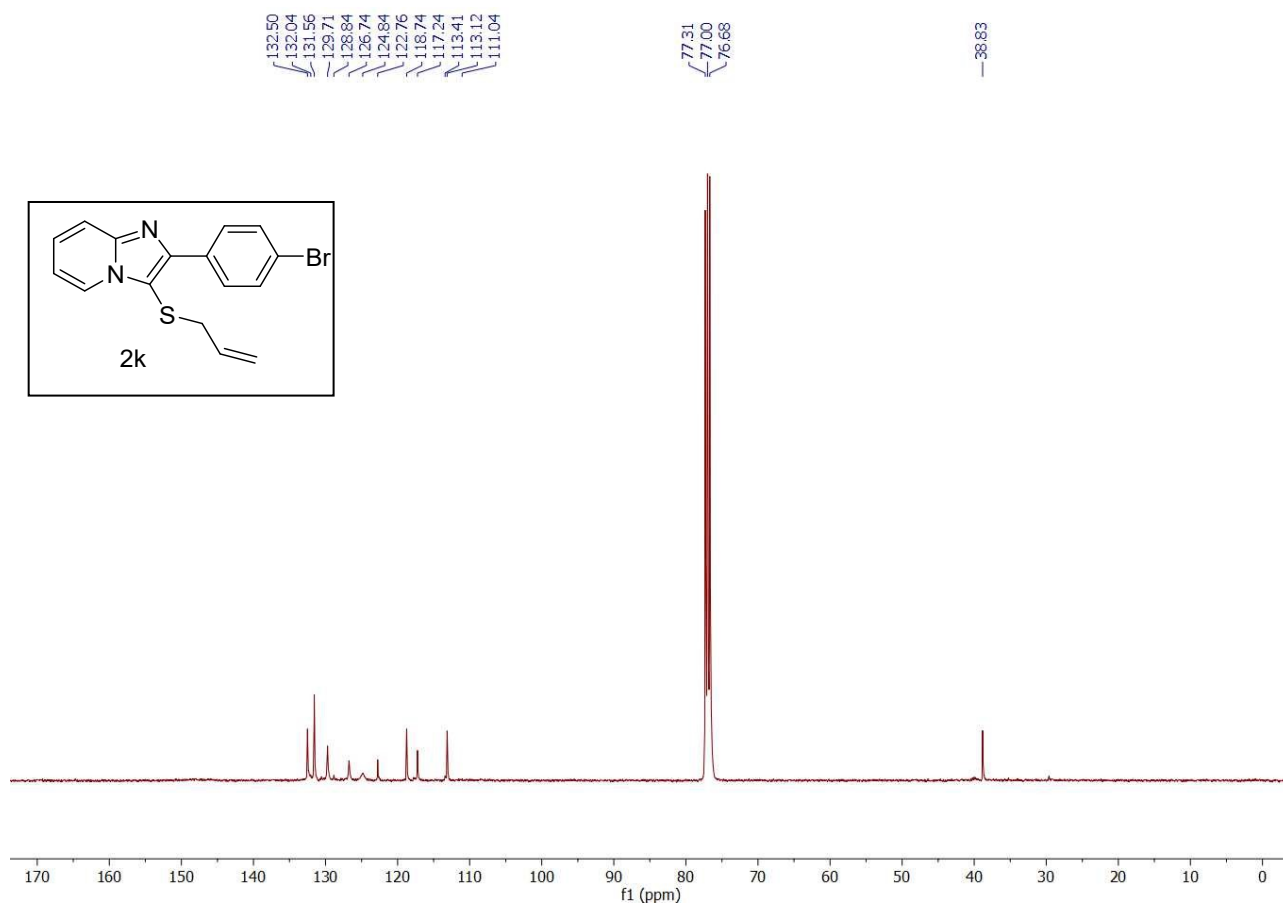

<sup>13</sup>C NMR spectra of (2k)

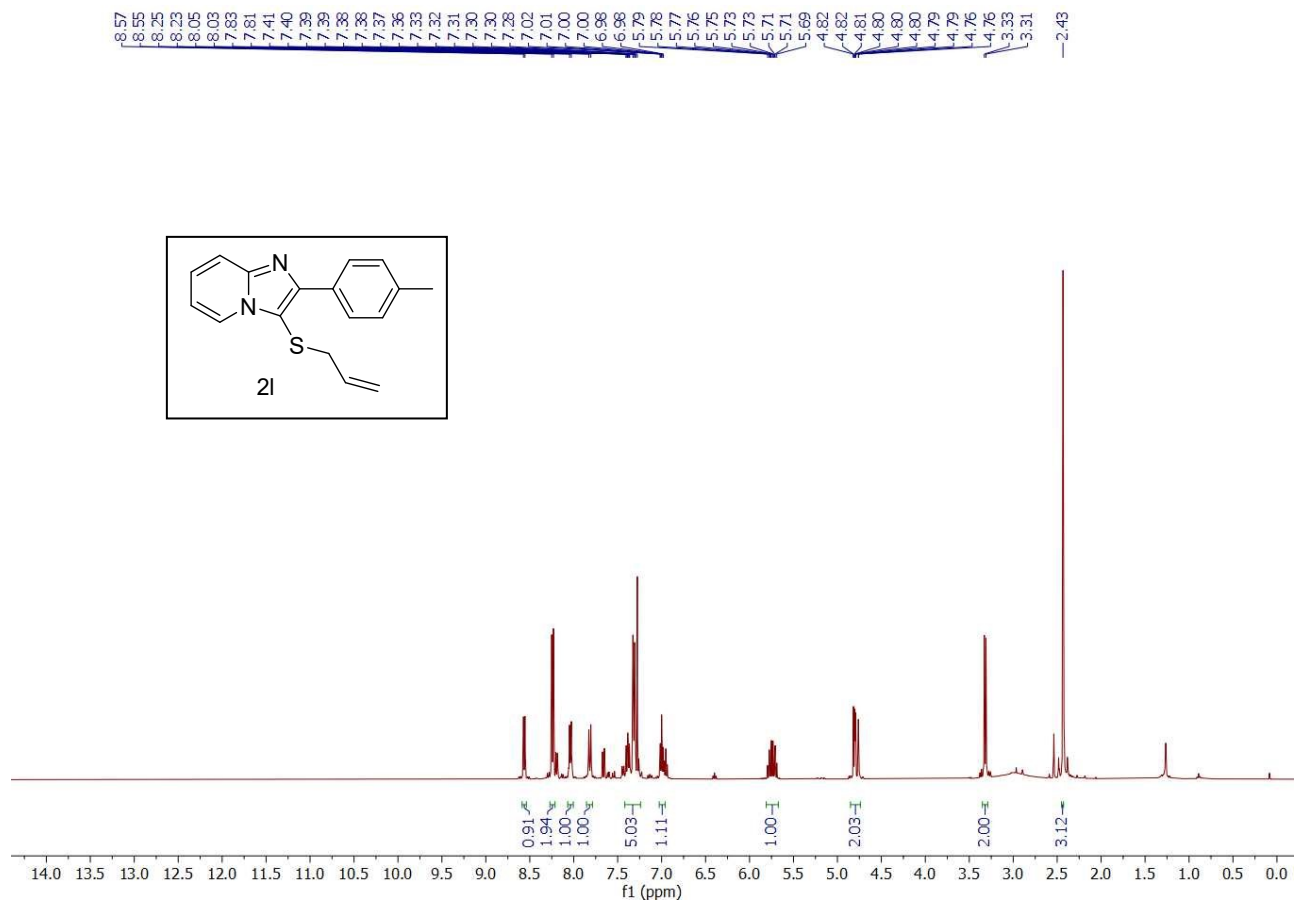

<sup>1</sup>H NMR spectra of (2l)

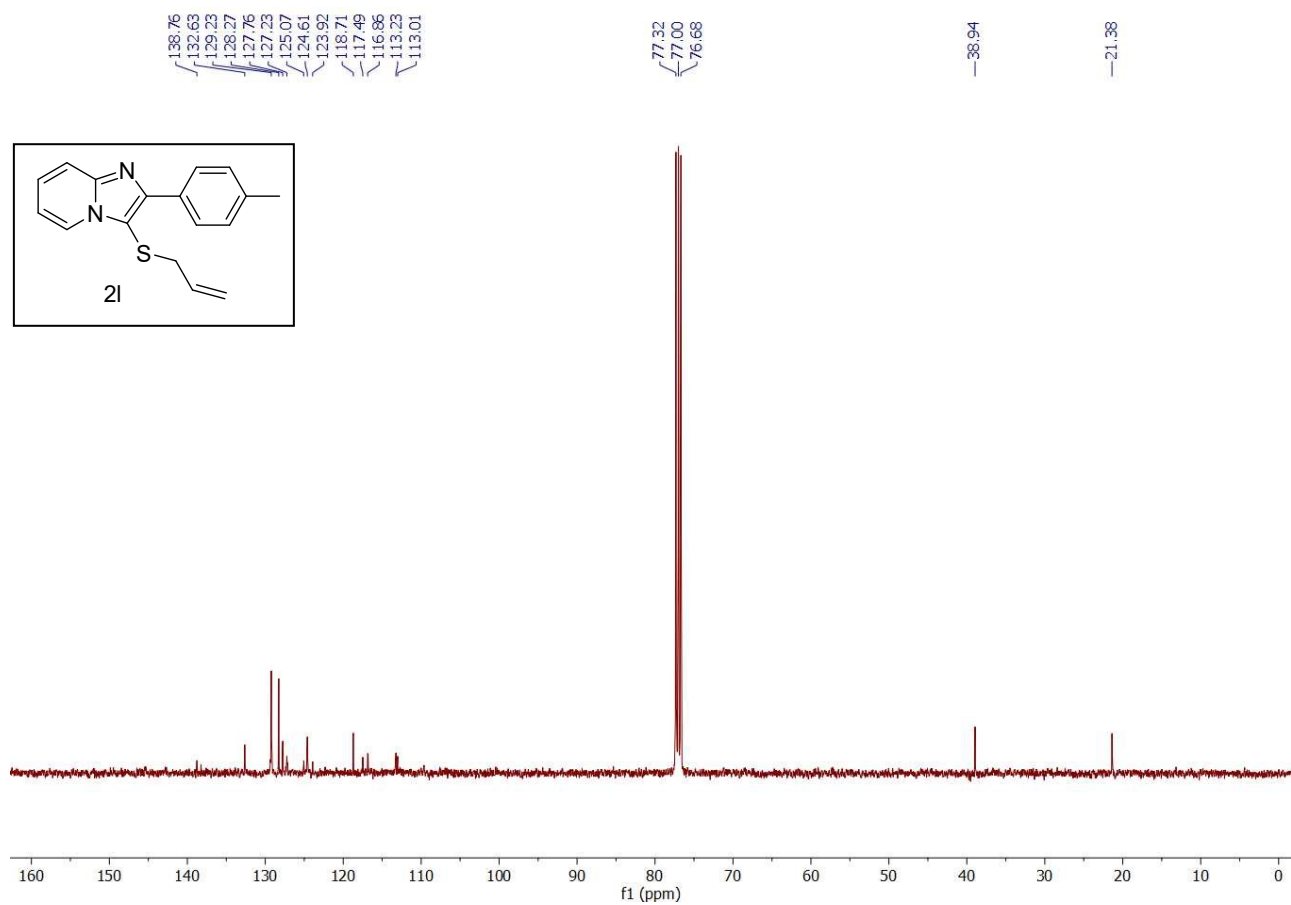

<sup>13</sup>C NMR spectra of (2l)

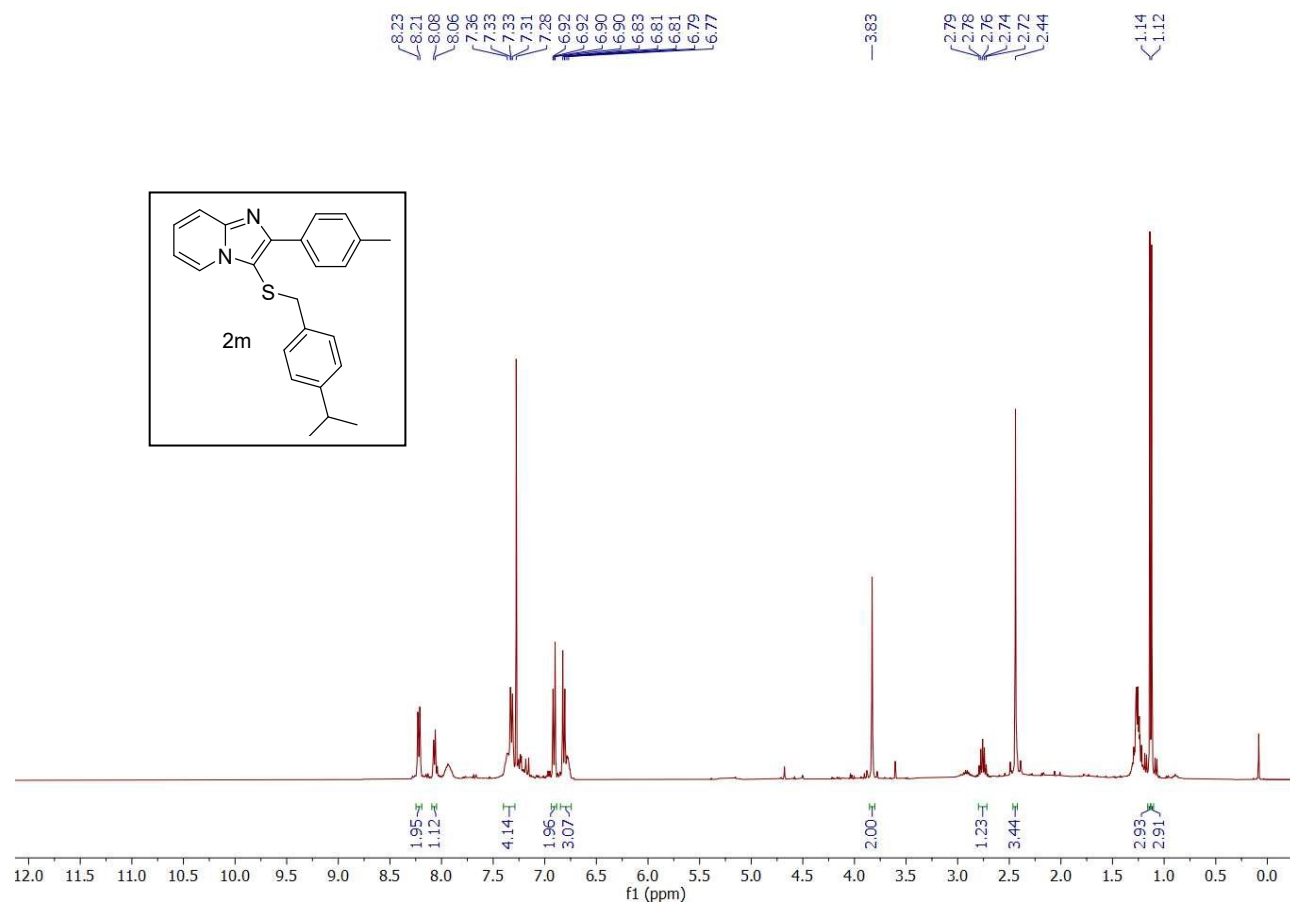

<sup>1</sup>H NMR spectra of (2m)

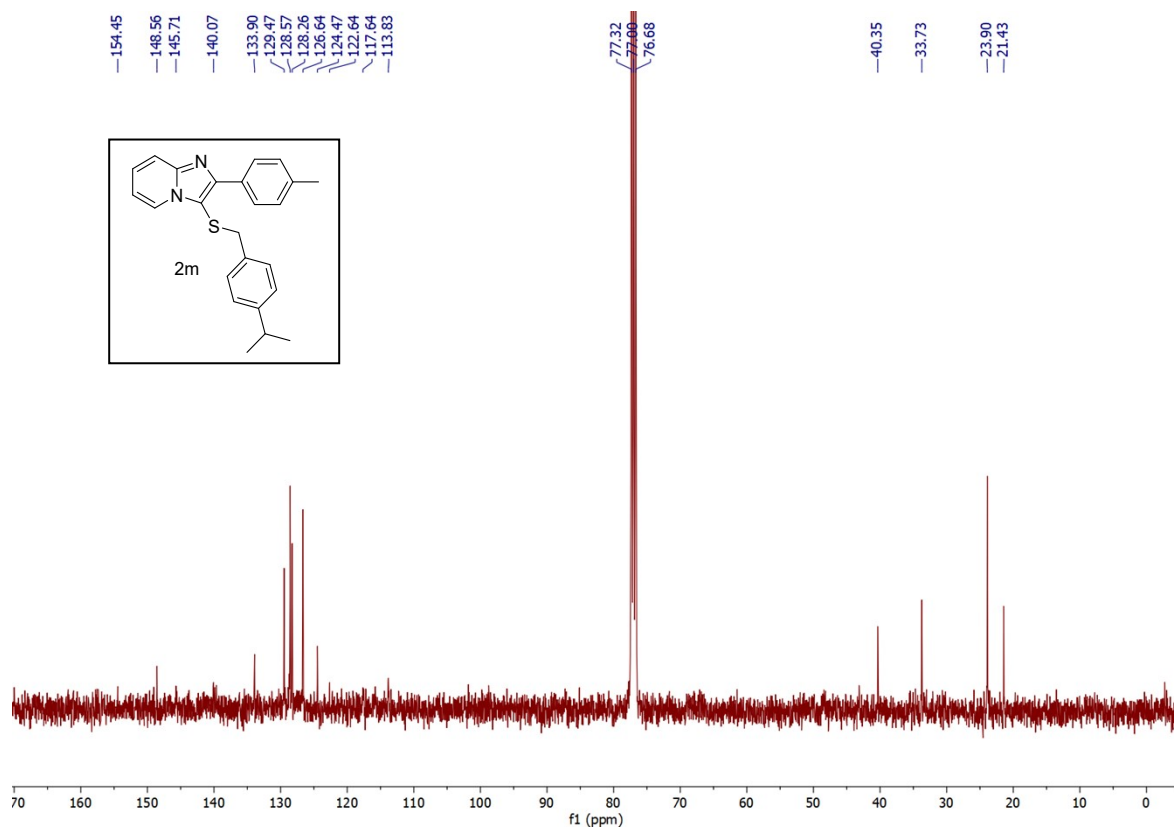

<sup>13</sup>C NMR spectra of (2m)

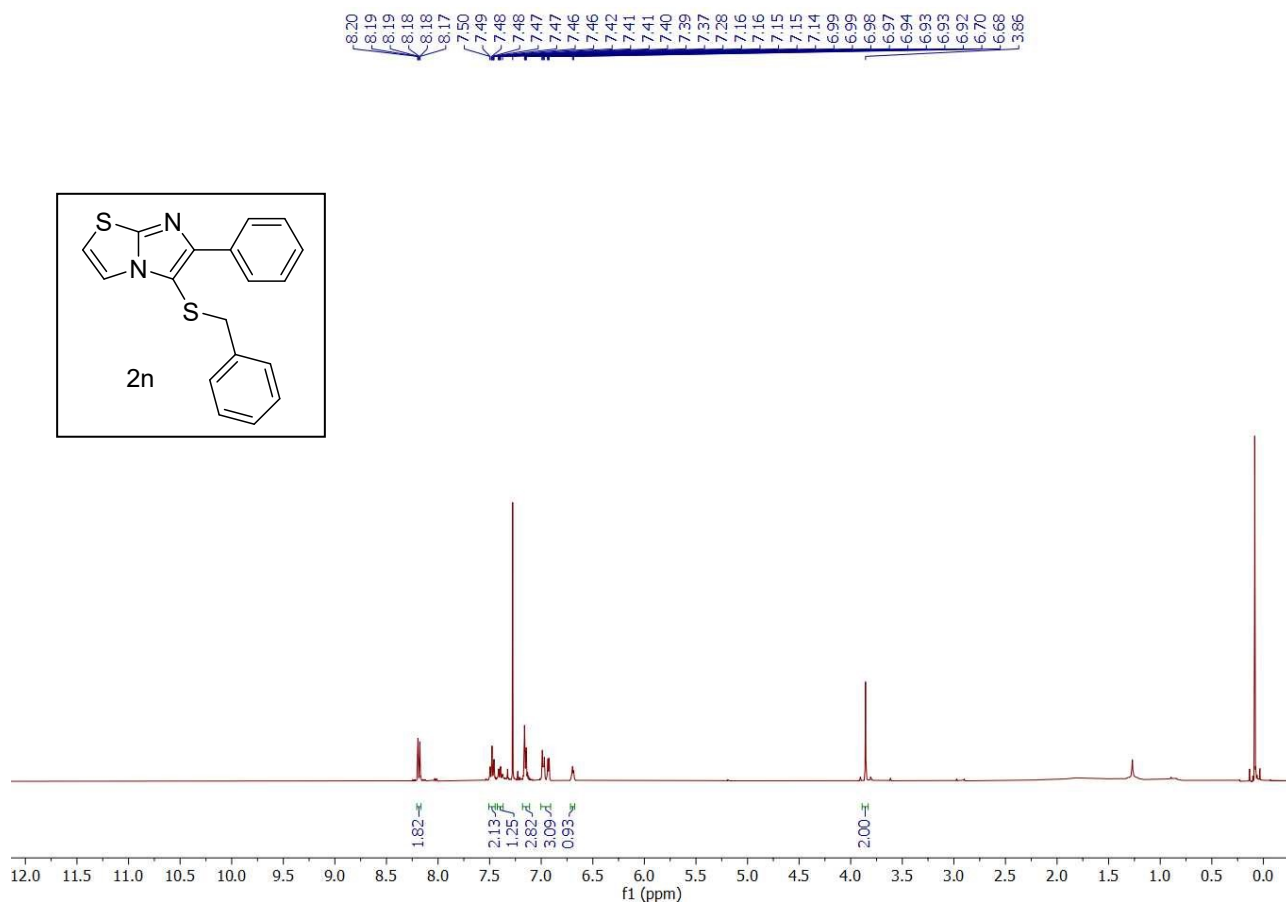

<sup>1</sup>H NMR spectra of (2n)



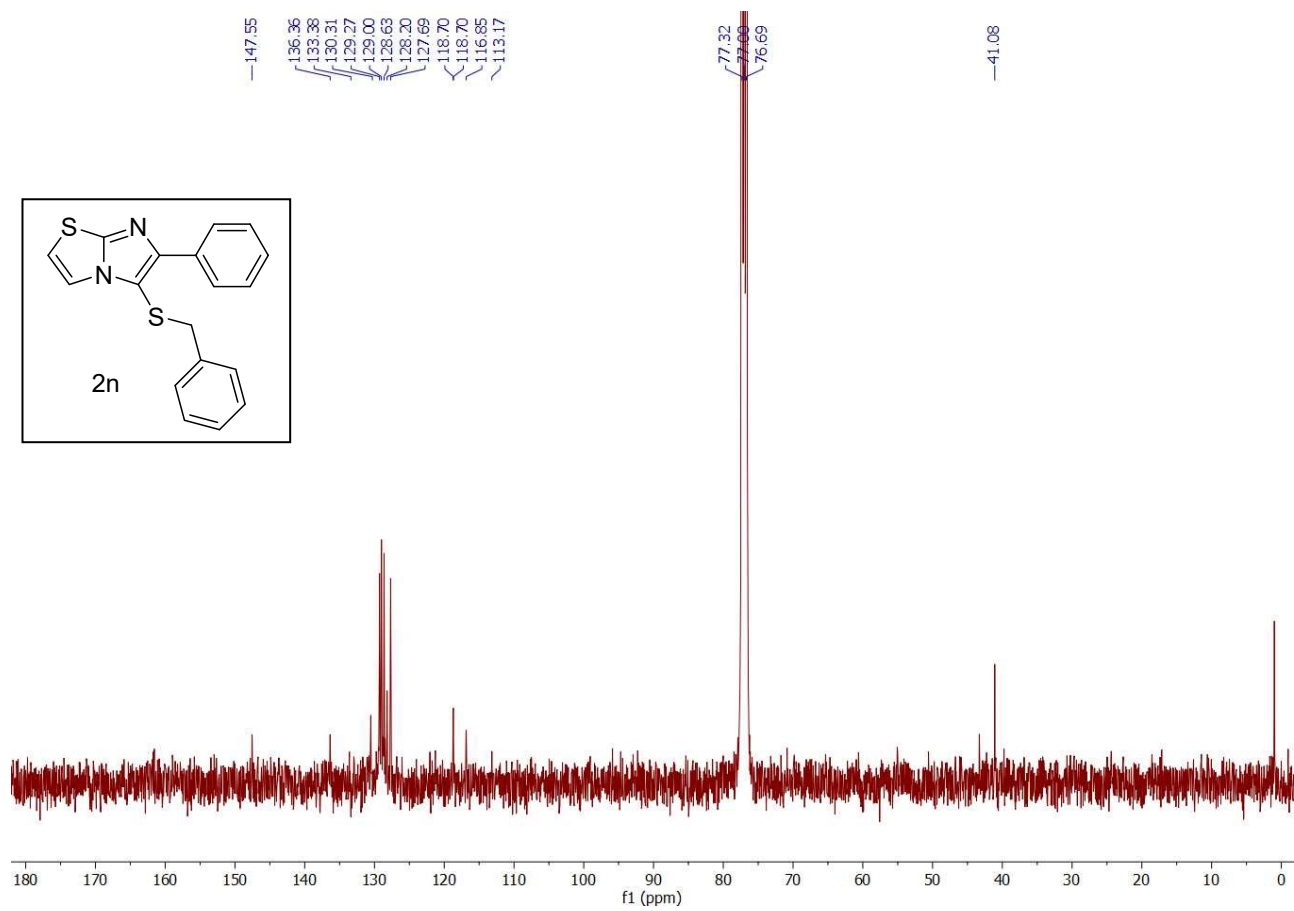

<sup>13</sup>C NMR spectra of (2n)

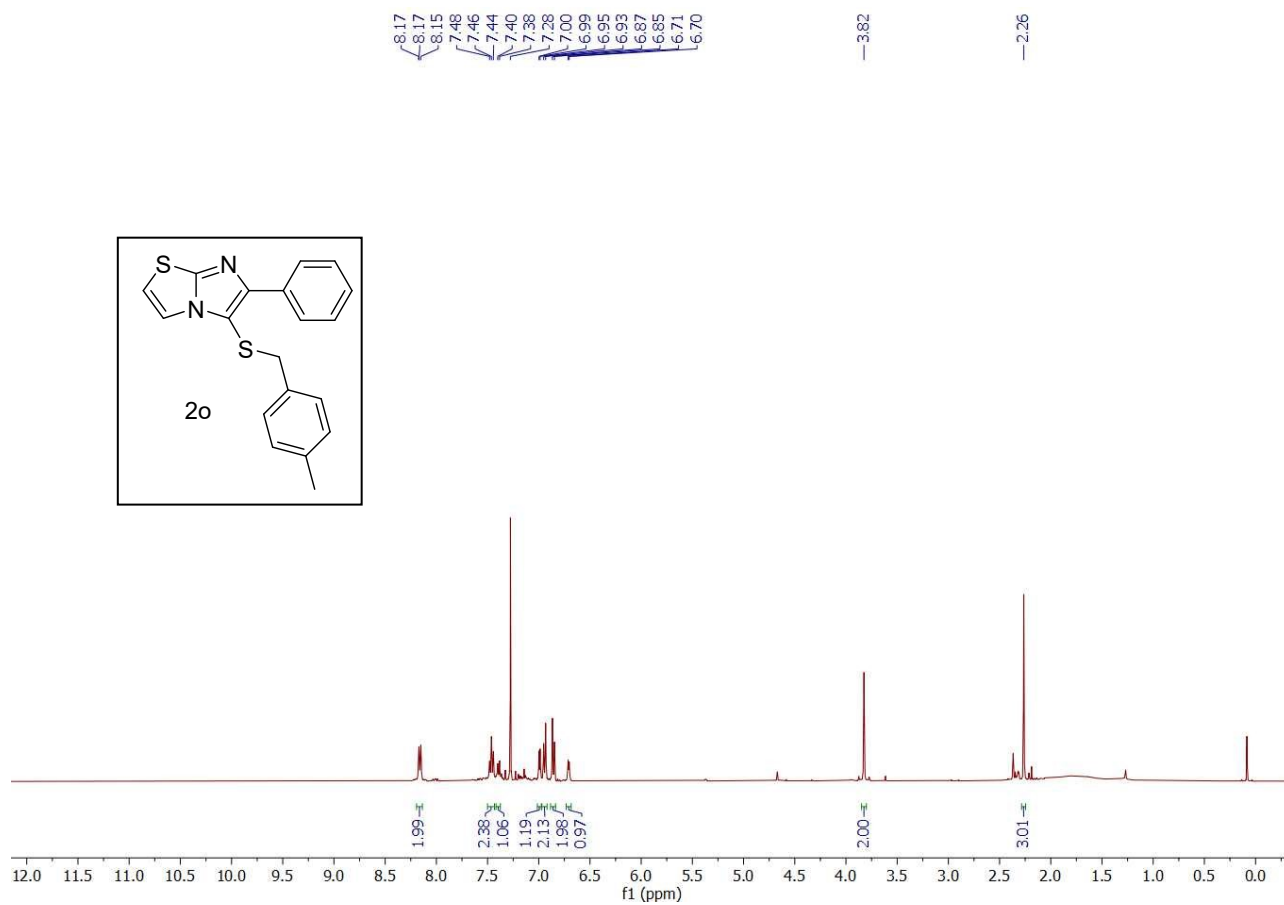

<sup>1</sup>H NMR spectra of (2o)

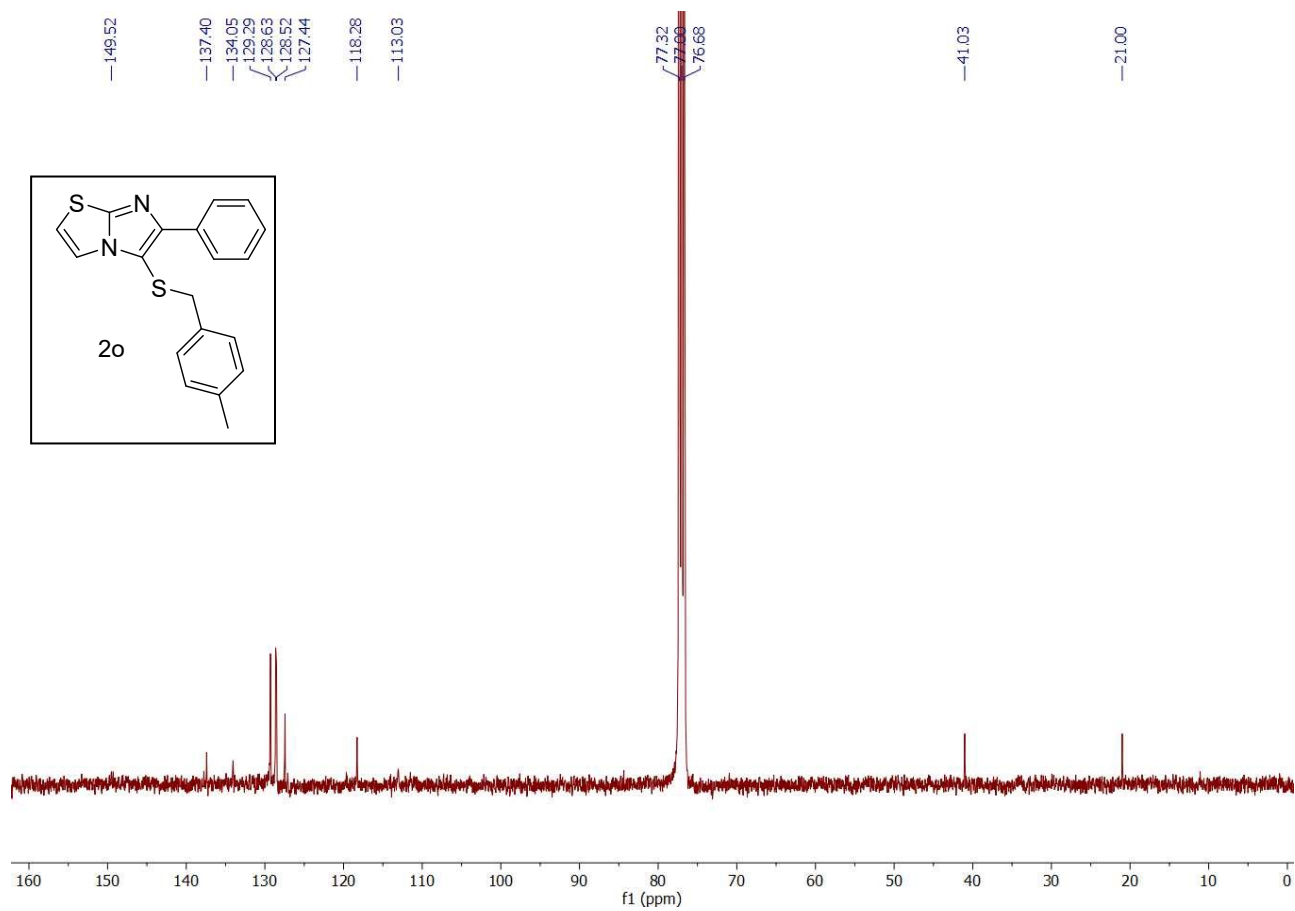

<sup>13</sup>C NMR spectra of (2o)

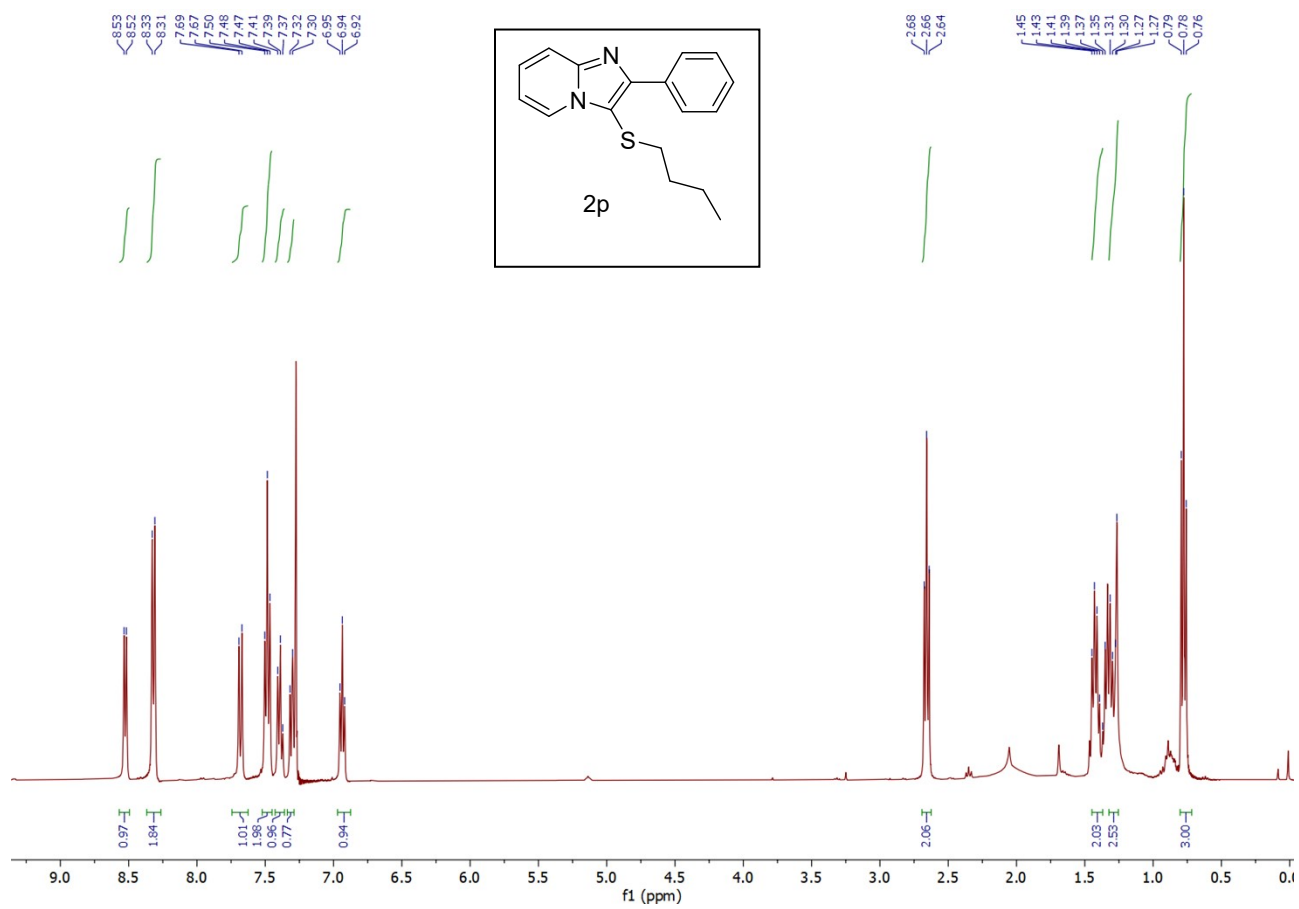

<sup>1</sup>H NMR spectra of (2p)

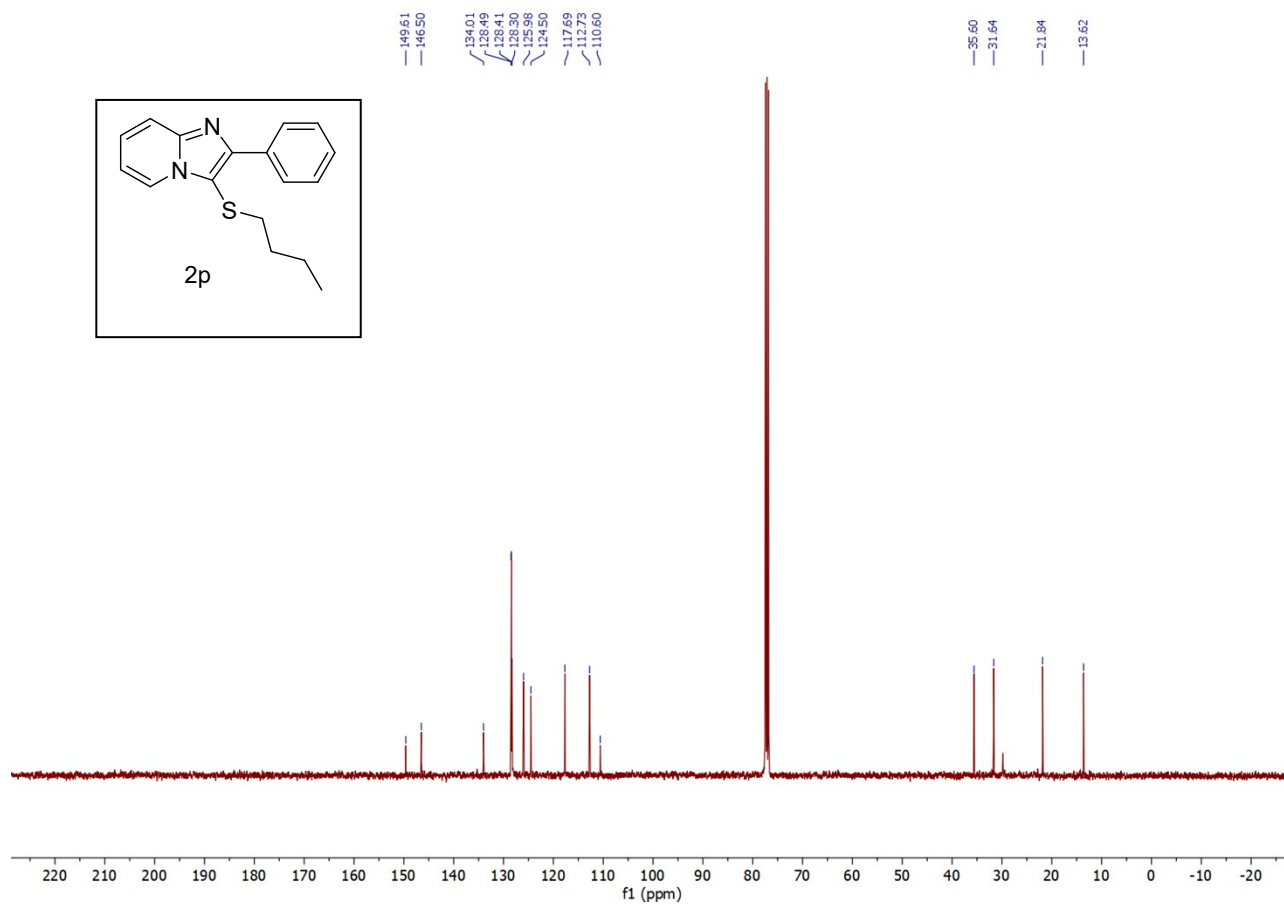

$^{13}\text{C}$  NMR spectra of (2p)

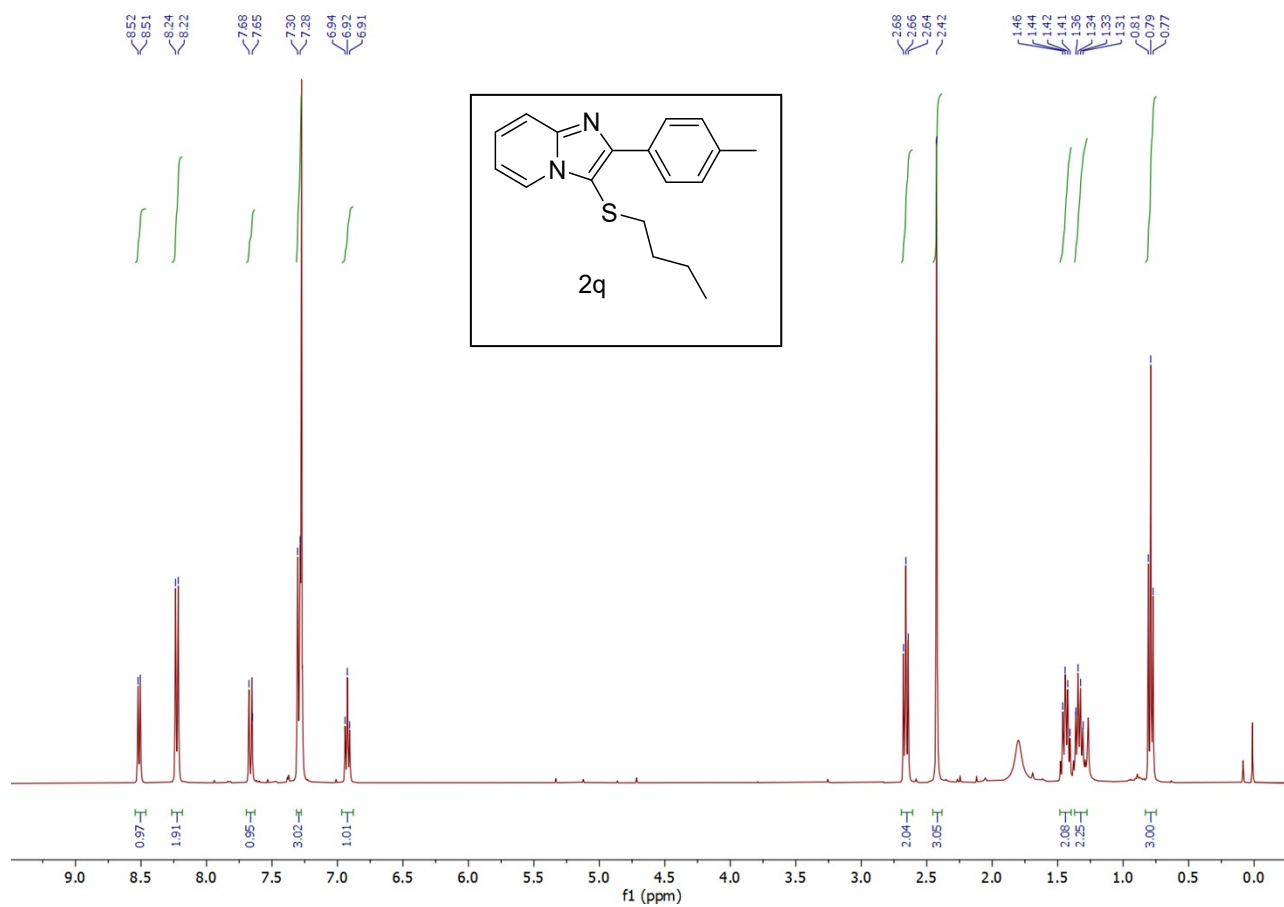

<sup>1</sup>H NMR spectra of (2q)

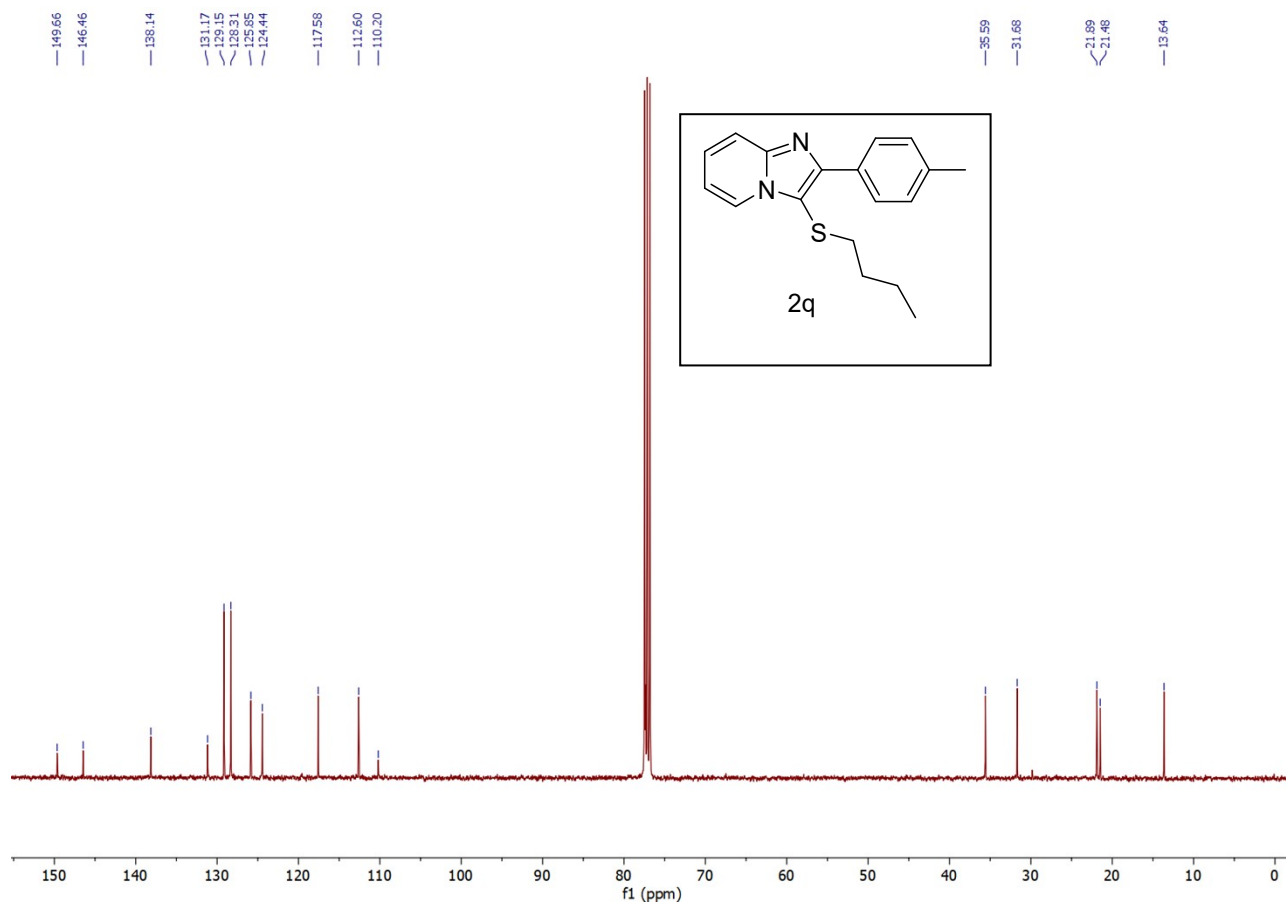

$^{13}\text{C}$  NMR spectra of (2q)

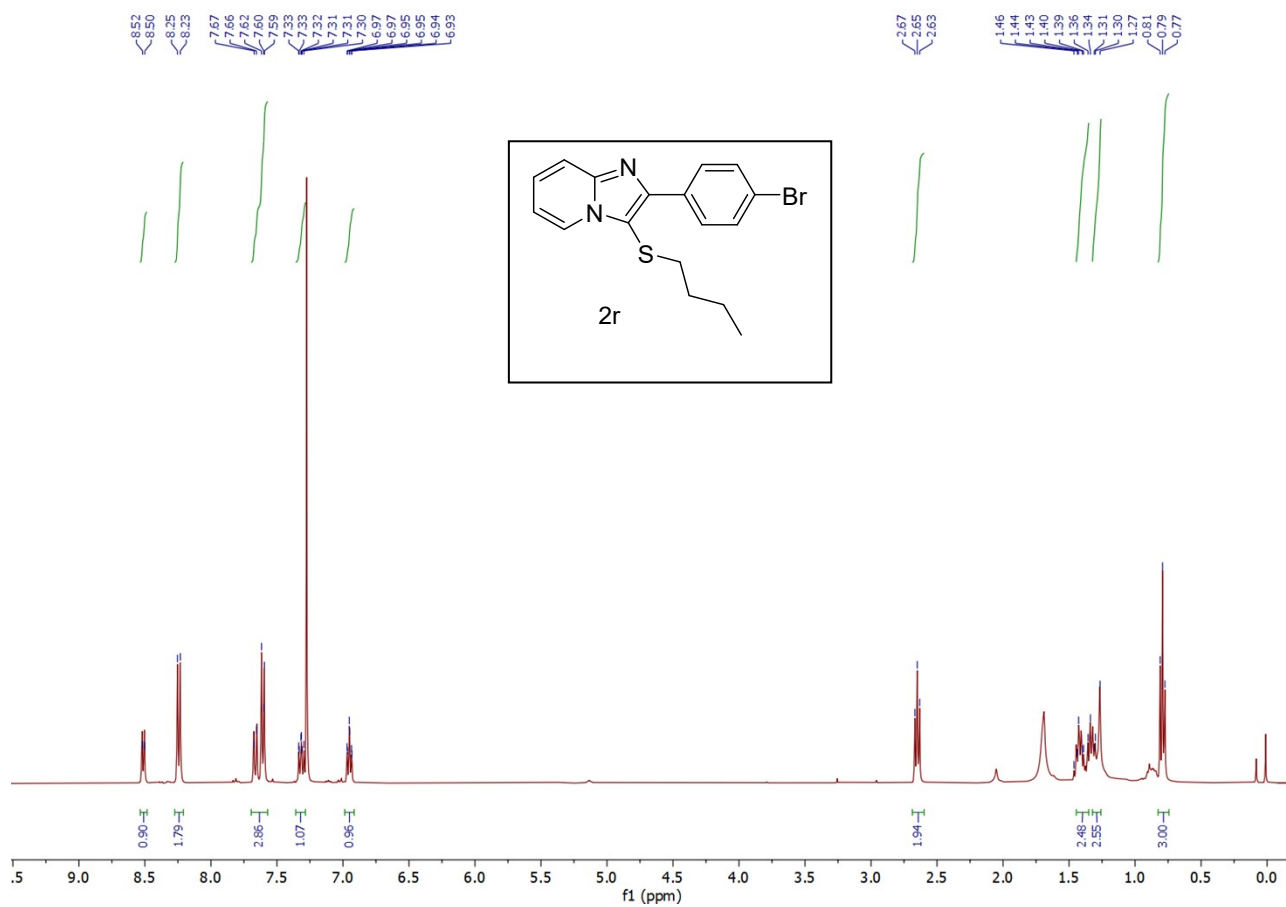

<sup>1</sup>H NMR spectra of (2r)



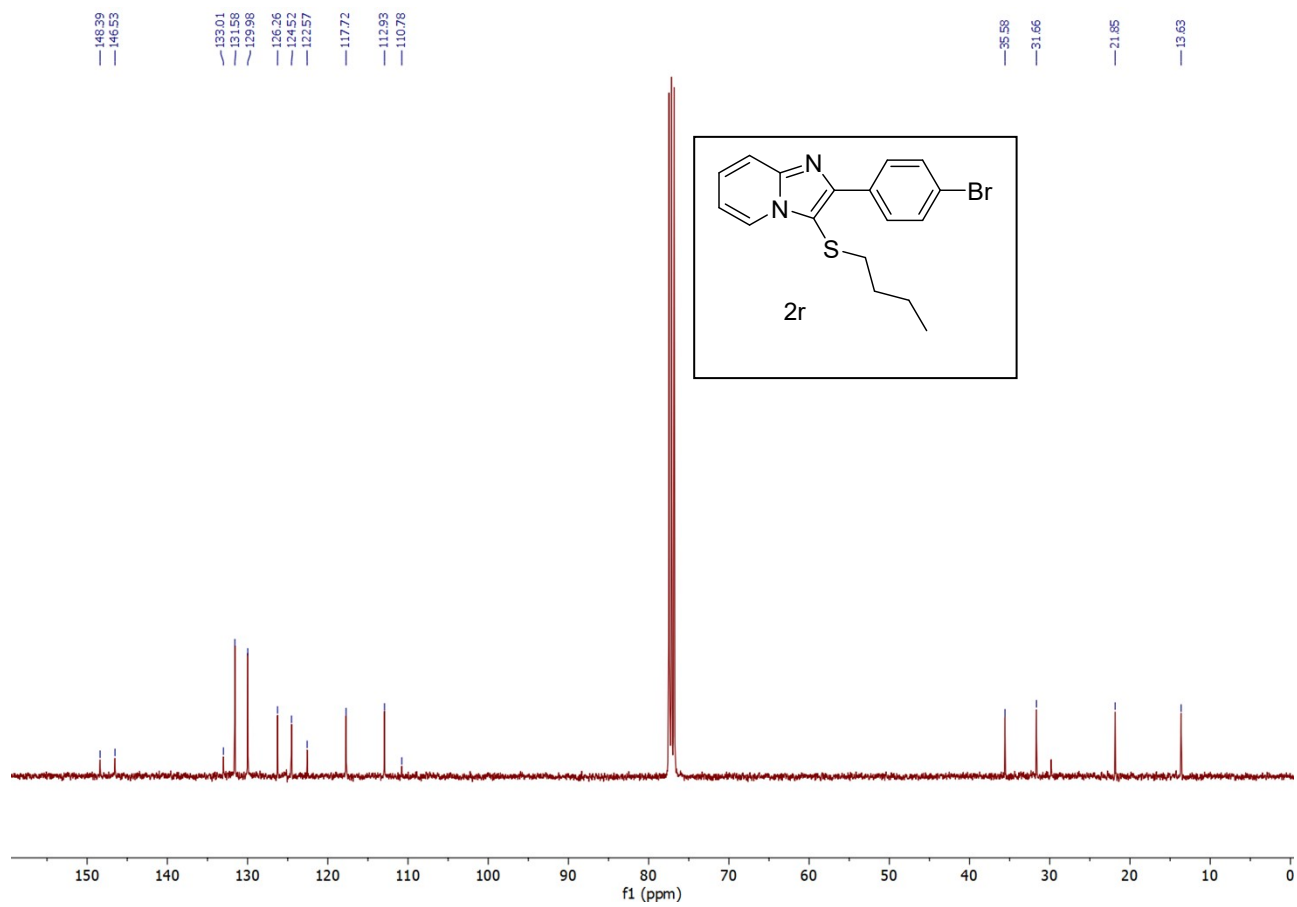

$^{13}\text{C}$  NMR spectra of (2r)

# HRMS Spectra

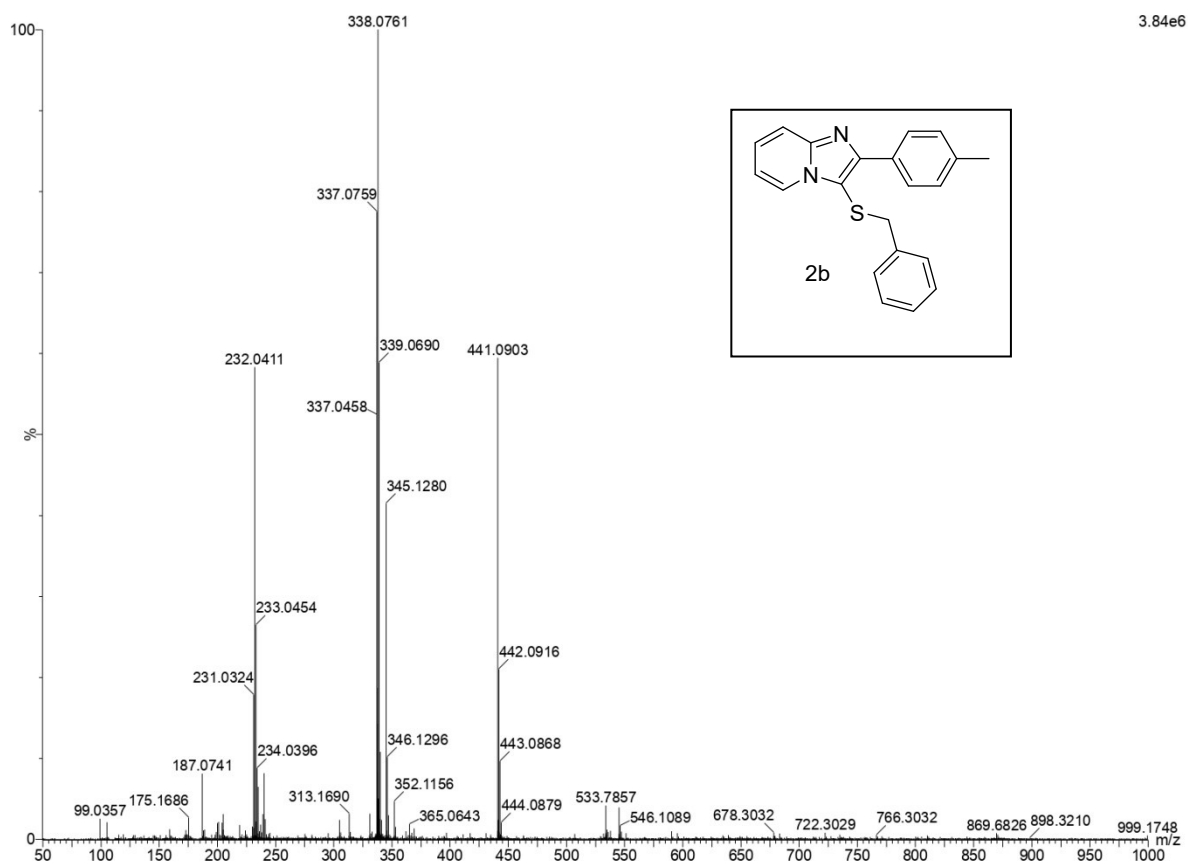

# User Spectrum Plot Report

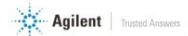

|                |           |              |                                 |         |                   |                                 |
|----------------|-----------|--------------|---------------------------------|---------|-------------------|---------------------------------|
| Name           | Sample5   | Rack Pos.    | Instrument                      | QTOF    | Operator          | SYSTEM (SYSTEM)                 |
| Inj. Vol. (ul) | 5         | Plate Pos.   | IRM Status                      | Success |                   |                                 |
| Data File      | KG-I-69.d | Method (Acq) | Comment                         |         | Acq. Time (Local) | 29-07-2024 12:47:54 (UTC+05:30) |
|                |           |              | DIRECT MASS_POSITIVE_100_1500.m |         |                   |                                 |

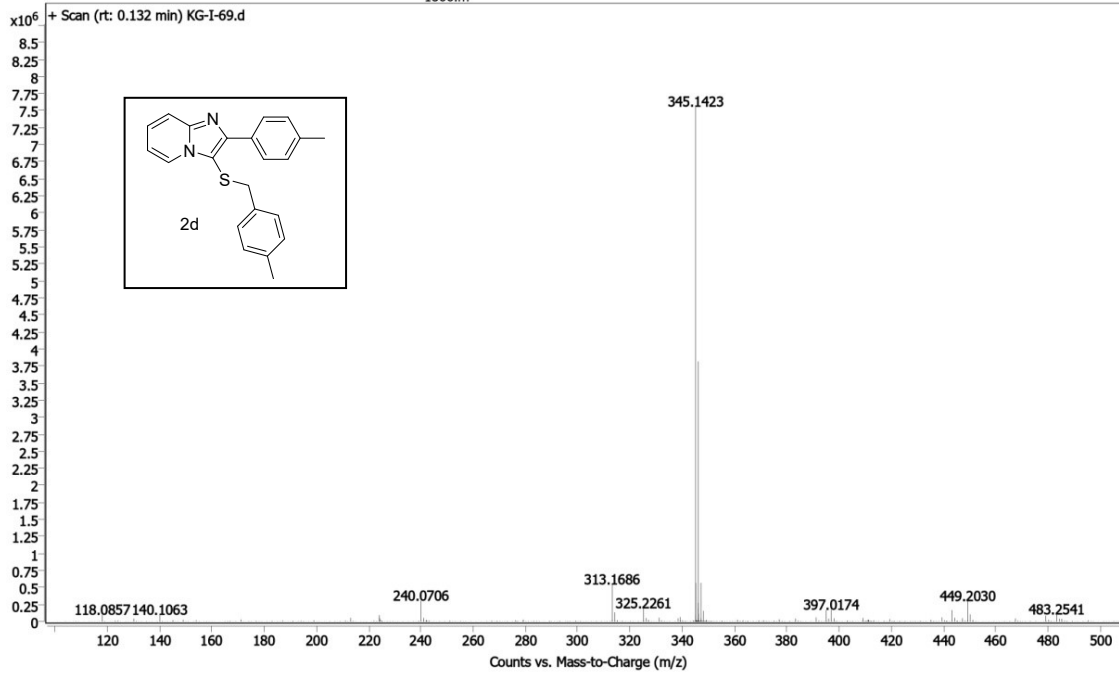

# User Spectrum Plot Report

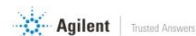

|                |           |              |            |         |                   |                                 |
|----------------|-----------|--------------|------------|---------|-------------------|---------------------------------|
| Name           | Sample2   | Rack Pos.    | Instrument | QTOF    | Operator          | SYSTEM (SYSTEM)                 |
| Inj. Vol. (ul) | 5         | Plate Pos.   | IRM Status | Success |                   |                                 |
| Data File      | KG-I-54.d | Method (Acq) | Comment    |         | Acq. Time (Local) | 29-07-2024 12:39:00 (UTC+05:30) |

DIRECT  
MASS\_POSITIVE\_100\_  
1500.m

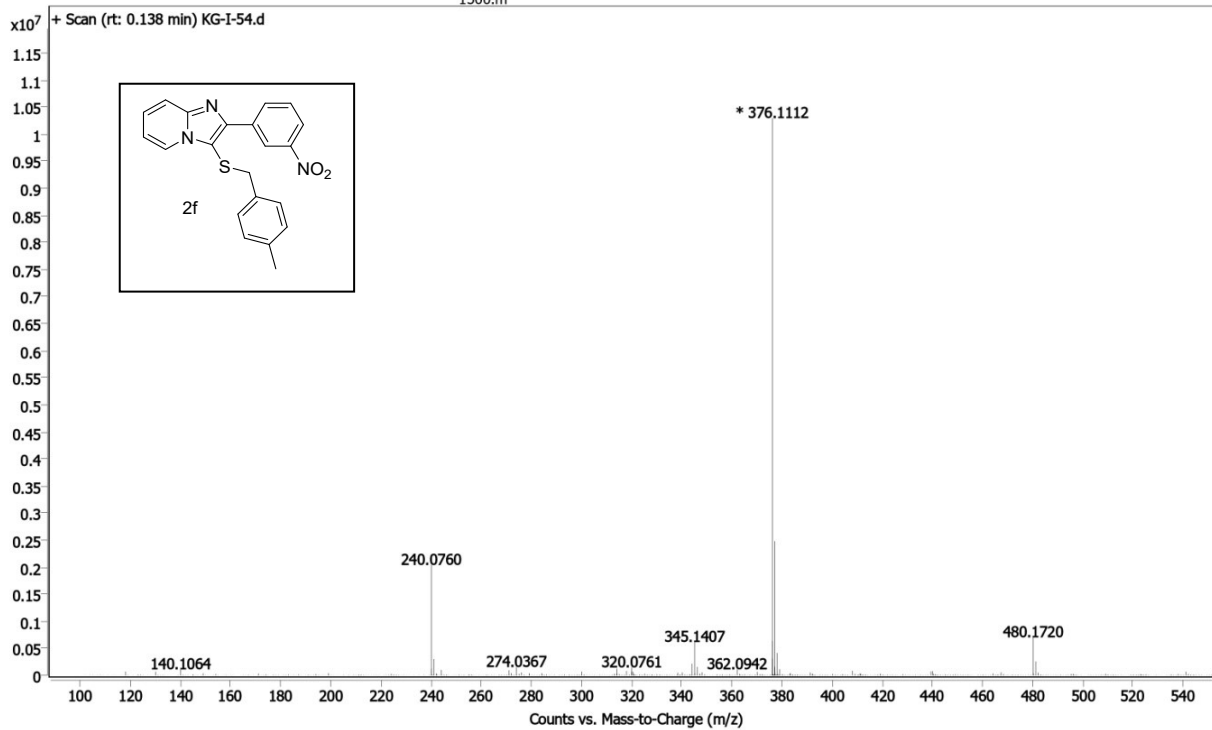

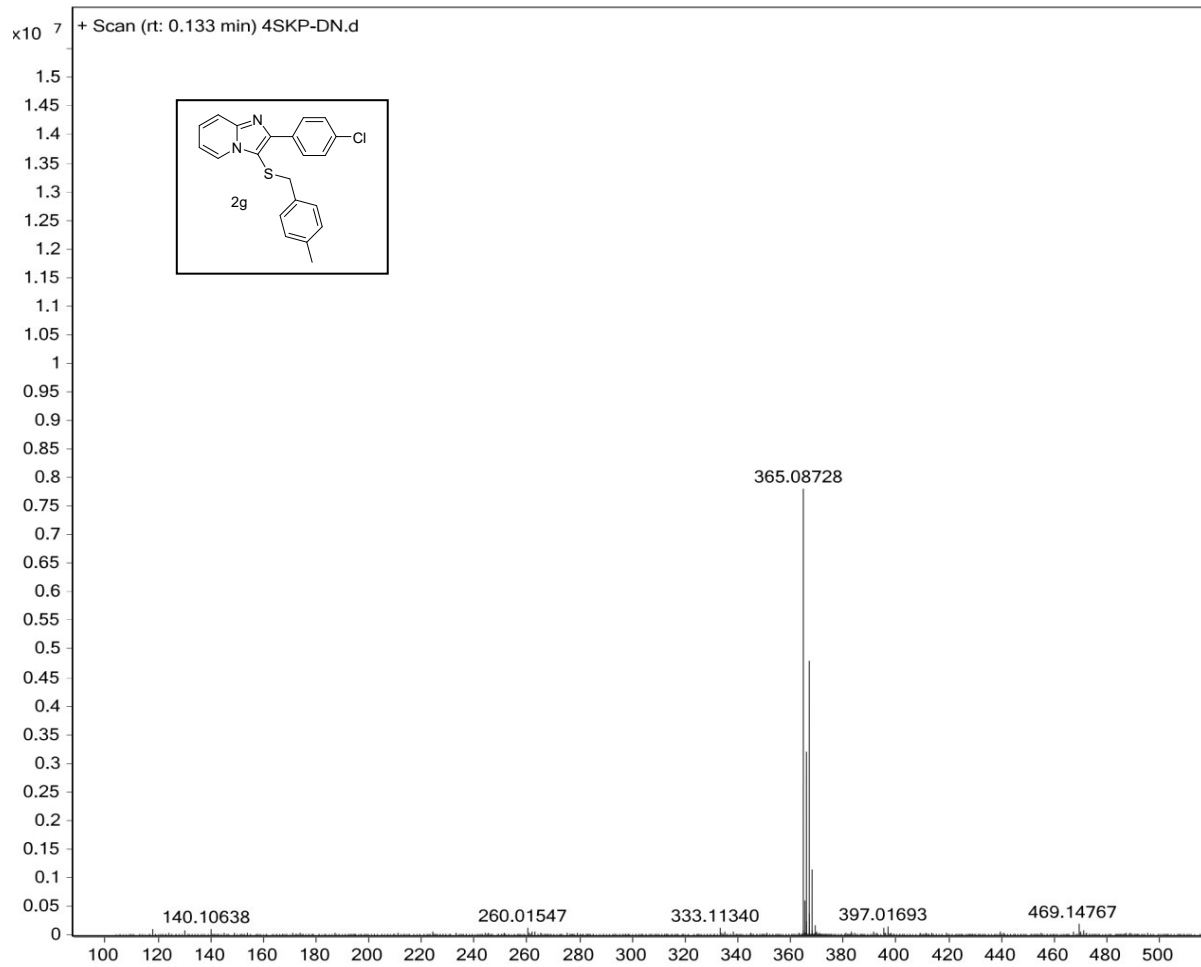

# User Spectrum Plot Report

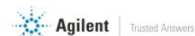

|                |           |              |                                        |         |                   |                                 |
|----------------|-----------|--------------|----------------------------------------|---------|-------------------|---------------------------------|
| Name           | Sample5   | Rack Pos.    | Instrument                             | QTOF    | Operator          | SYSTEM (SYSTEM)                 |
| Inj. Vol. (ul) | 5         | Plate Pos.   | IRM Status                             | Success |                   |                                 |
| Data File      | KG-I-43.d | Method (Acq) | Comment                                |         | Acq. Time (Local) | 29-07-2024 12:46:07 (UTC+05:30) |
|                |           |              | DIRECT<br>MASS_POSITIVE_100_<br>1500.m |         |                   |                                 |

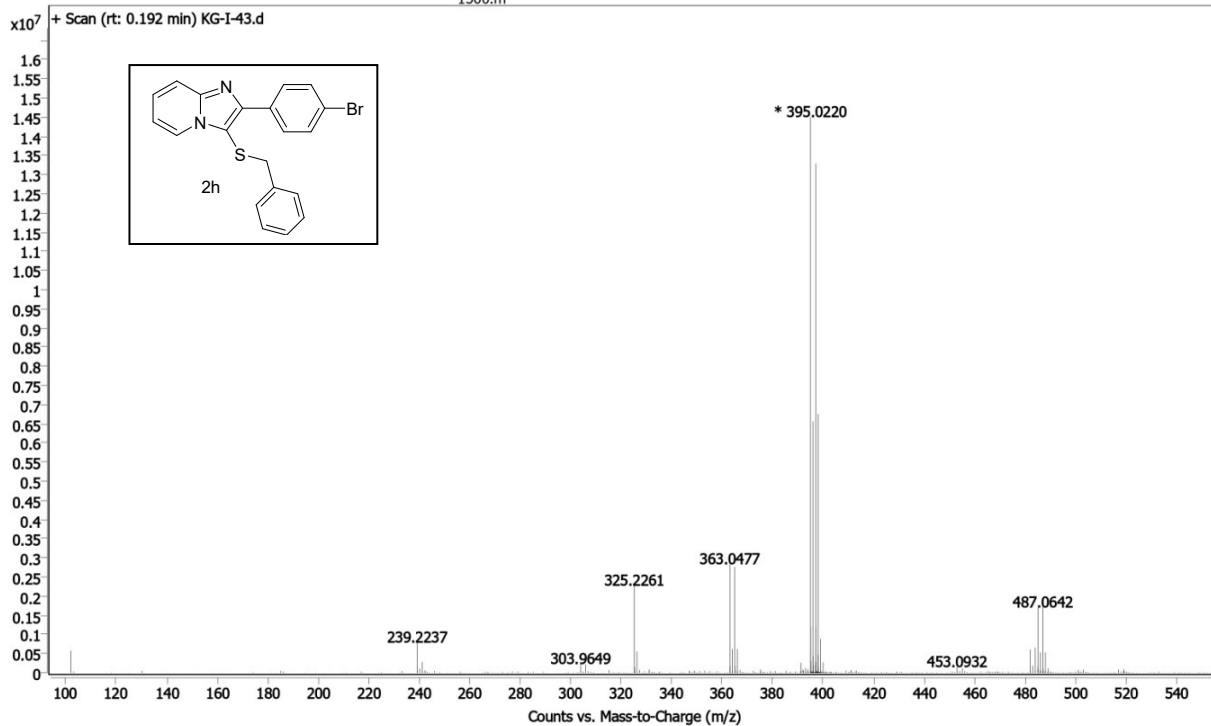

## S11. NMR and FTIR spectra of *S,S*-Dibenzyltrithiocarbonate

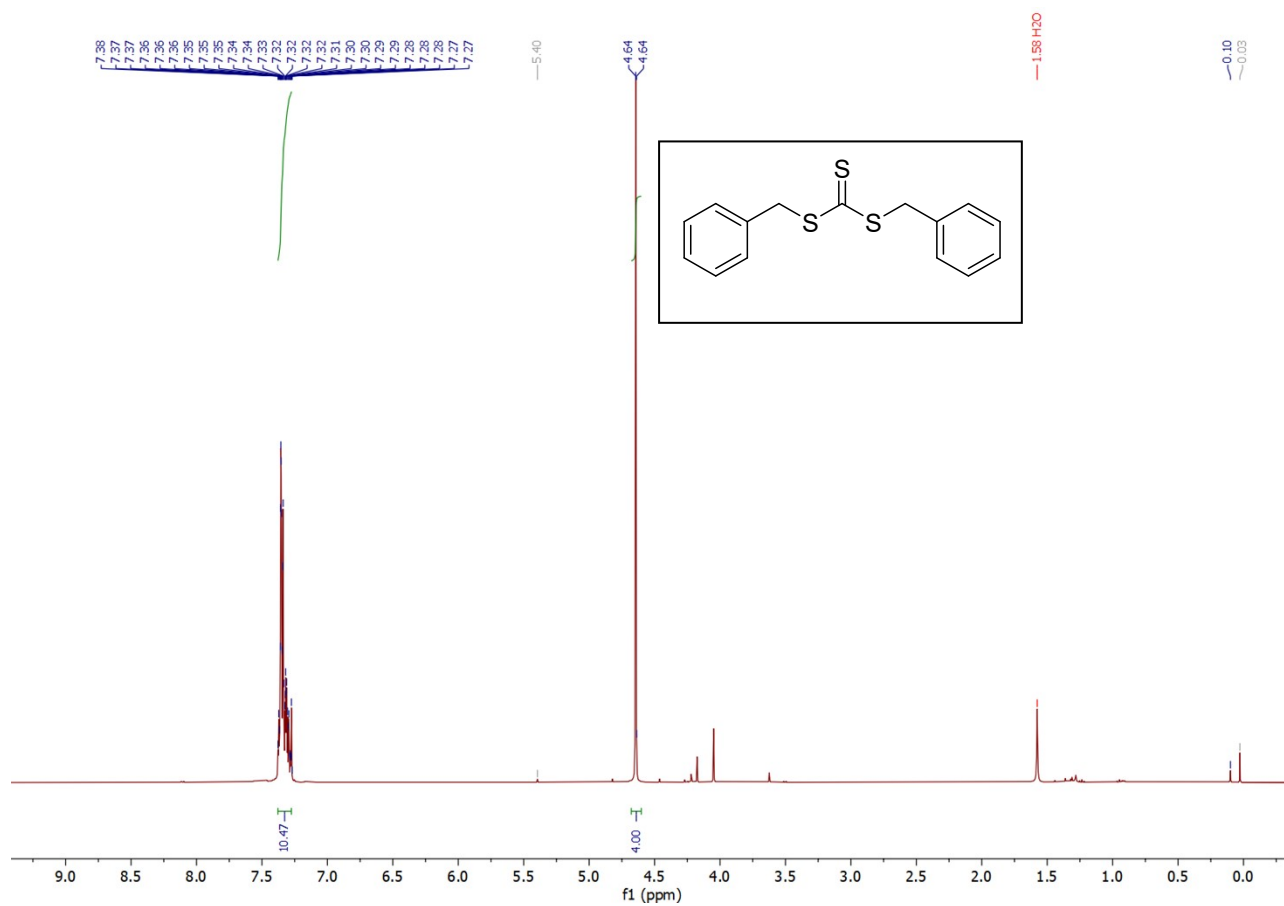

<sup>1</sup>H NMR spectra of *S,S*-Dibenzyltrithiocarbonate

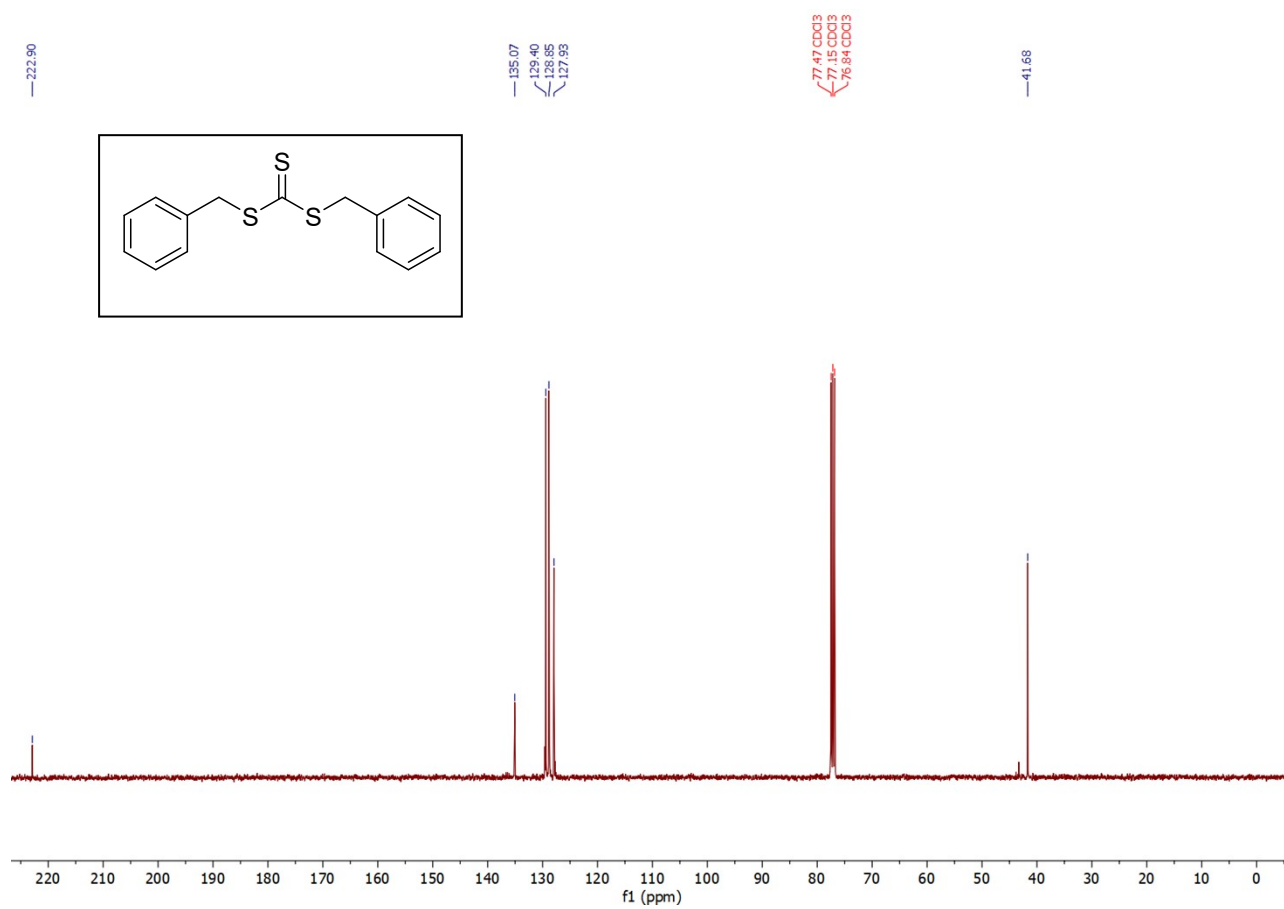

$^{13}\text{C}$  NMR spectra of *S,S*-Dibenzyltrithiocarbonate



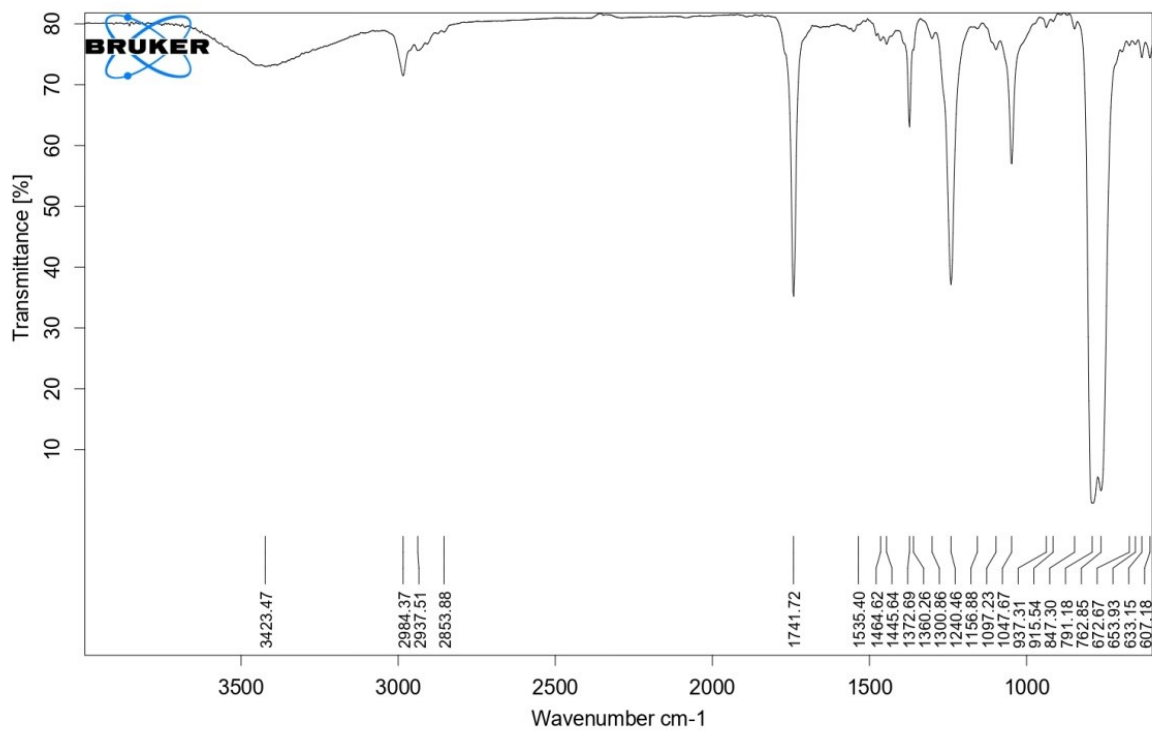

FTIR Spectra of *S,S*-Dibenzyltrithiocarbonate

**12. Single crystal XRD data of the 2-(4-chlorophenyl)-3-((4-methylbenzyl)thio)imidazo[1,2-a]pyridine (2g)**

|                                   |                                                                                                                                 |
|-----------------------------------|---------------------------------------------------------------------------------------------------------------------------------|
| Identification code               | shelx                                                                                                                           |
| Empirical formula                 | C <sub>21</sub> H <sub>17</sub> ClN <sub>2</sub> S                                                                              |
| Formula weight                    | 364.88                                                                                                                          |
| Temperature                       | 296(2) K                                                                                                                        |
| Wavelength                        | 0.71073 Å                                                                                                                       |
| Crystal system, space group       | Triclinic, P -1                                                                                                                 |
| Unit cell dimensions              | a = 7.7958(9) Å,    alpha = 101.374(7)°<br>b = 11.0760(19) Å,    beta = 107.360(6)°<br>c = 11.1247(14) Å,    gamma = 90.842(8)° |
| Volume                            | 896.0(2) Å <sup>3</sup>                                                                                                         |
| Z                                 | 2                                                                                                                               |
| Calculated density                | 1.352 Mg/m <sup>3</sup>                                                                                                         |
| Absorption coefficient            | 0.335 mm <sup>-1</sup>                                                                                                          |
| F(000)                            | 380                                                                                                                             |
| Crystal size                      | 0.300 x 0.200 x 0.100 mm <sup>3</sup>                                                                                           |
| Theta range for data collection   | 2.746 to 28.357 °                                                                                                               |
| Limiting indices                  | -10<=h<=10;    -14<=k<=5;    -14<=l<=14                                                                                         |
| Reflections collected / unique    | 7361 / 4183 [R(int) = 0.0257]                                                                                                   |
| Completeness to theta             | 97.2 %                                                                                                                          |
| Absorption correction             | Semi-empirical from equivalents                                                                                                 |
| Max. and min. transmission        | 0.967 and 0.906                                                                                                                 |
| Refinement method                 | Full-matrix least-squares on F <sup>2</sup>                                                                                     |
| Data / restraints / parameters    | 4183 / 0 / 227                                                                                                                  |
| Goodness-of-fit on F <sup>2</sup> | Å0.746                                                                                                                          |
| Final R indices [I>2sigma (I)]    | R1 = 0.0469, wR2 = 0.1489                                                                                                       |
| R indices (all data)              | R1 = 0.0795, wR2 = 0.1963                                                                                                       |
| Extinction coefficient            | n/a                                                                                                                             |
| Largest diff. peak and hole       | 0.325 and -0.174 e. Å <sup>-3</sup>                                                                                             |

13. ORTEP image of the 2-(4-chlorophenyl)-3-((4-methylbenzyl)thio)imidazo[1,2-a]pyridine (2g)

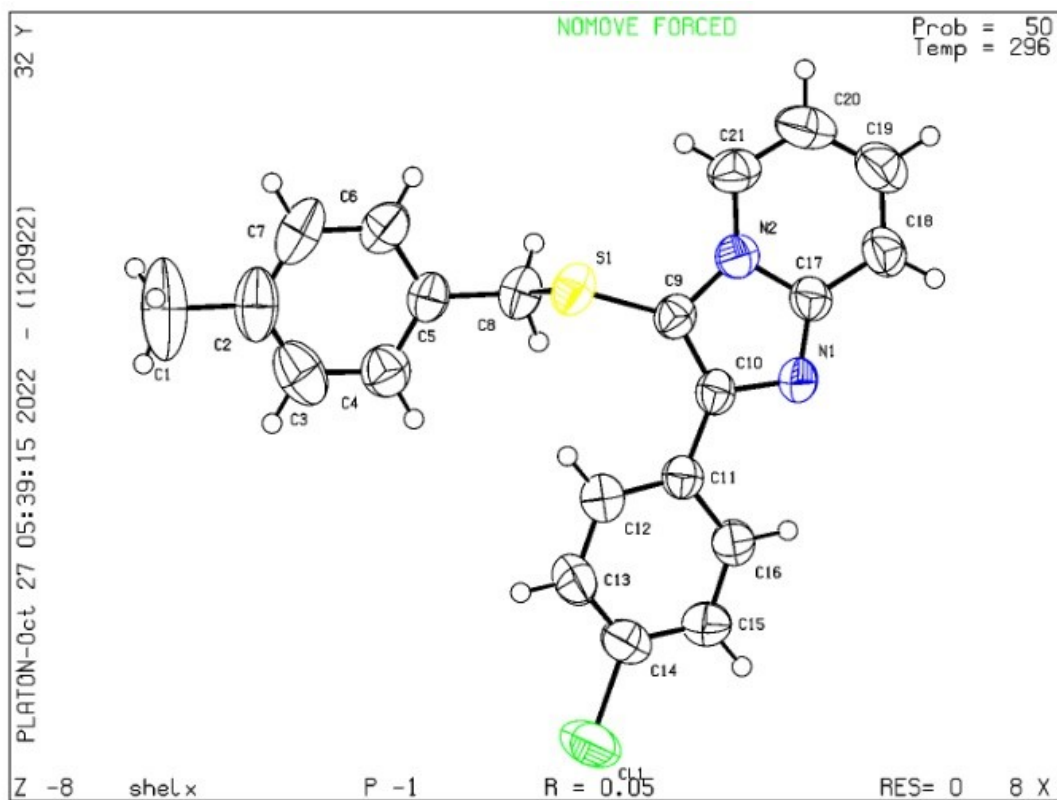

(CCDC 2348383)

## 14. Computational Details

All density functional theory (DFT) computations in this study were performed employing the Gaussian 16 program package.<sup>5</sup> Ground state energy minimization for all the reactants, products and intermediates were performed with the B3LYP functional. All non-metallic elements like H, C, N, S were described by using localized 6-31+G(d) basis set while for Cu atom an effective core potentials (ECP) basis LANL2DZ was employed. Previous studies report that dispersion corrected B3LYP level of theory offers precise geometry and found to account satisfactory results for this type of Cu-catalyzed mechanism.<sup>6,7</sup> Solvation was introduced implicitly by applying the Polarizable Continuum Model (PCM),<sup>8-9</sup> using the integral equation formalism variant as implemented in Gaussian 16 package with DMF as the solvent. In solution phase all ground state energy minimizations were carried out without symmetry restrictions. Thermodynamic parameters like free energy, enthalpy corrections were evaluated at 298.15 K and 1 atm pressure, incorporating zero-point energy corrections (ZPE). Vibration frequency calculation at the same level of theory confirms that the optimized geometries correspond to minima on the potential energy surfaces. The electronic structures of the reaction intermediates 1a-d and transition states TS<sub>c-d</sub> are estimated and stability analysis were performed and all of them were found to be stable.

## 15. Optimized geometric coordinates (XYZ coordinates)

### 1a

|   |             |             |             |
|---|-------------|-------------|-------------|
| C | -1.35722500 | 1.21491100  | -0.33101700 |
| C | 0.02767100  | 1.29267000  | -0.07536800 |
| C | 0.60877900  | 2.48635200  | 0.36955000  |
| C | -0.23415200 | 3.58129800  | 0.54541800  |
| C | -1.61877200 | 3.49696600  | 0.28044800  |
| C | -2.20636200 | 2.31331600  | -0.16335400 |
| H | 1.67363100  | 2.55475900  | 0.57022500  |
| H | 0.18216100  | 4.52277200  | 0.89155700  |
| H | -2.24121500 | 4.37497200  | 0.42570000  |
| H | -3.27029000 | 2.25552300  | -0.36870600 |
| C | -0.41136400 | -0.73434500 | -0.75007100 |
| N | 0.59224700  | 0.04961100  | -0.36063000 |
| N | -1.59511100 | -0.09126000 | -0.75923000 |
| C | -2.89365600 | -0.67455000 | -1.12763700 |
| H | -3.41271900 | 0.05586900  | -1.75631100 |
| H | -2.68596900 | -1.55117500 | -1.74712300 |
| C | -3.74193800 | -1.05721300 | 0.09174300  |
| H | -3.89483400 | -0.17435200 | 0.72577400  |
| H | -3.19048600 | -1.79113000 | 0.69407600  |
| C | -5.10184300 | -1.63668900 | -0.32264600 |

|    |             |             |             |
|----|-------------|-------------|-------------|
| H  | -5.64067600 | -0.89860200 | -0.93315300 |
| H  | -4.94336800 | -2.51498000 | -0.96407400 |
| C  | -5.96485800 | -2.03187000 | 0.88173400  |
| H  | -6.16724000 | -1.16585400 | 1.52460600  |
| H  | -6.92886700 | -2.44133900 | 0.55778800  |
| H  | -5.46542000 | -2.79365500 | 1.49360400  |
| Cl | 4.48610700  | -0.79407000 | -0.99957400 |
| Cu | 2.44948300  | -0.49771300 | -0.18852100 |
| H  | -0.30809800 | -1.77199600 | -1.03556900 |
| Cl | 2.55158500  | -1.17302800 | 1.98986500  |

**1b**

|    |             |             |             |
|----|-------------|-------------|-------------|
| C  | -2.98384200 | -0.40788200 | 1.11414500  |
| C  | -1.89135200 | -1.22524100 | 0.75268500  |
| C  | -1.70260700 | -2.47495500 | 1.35671400  |
| C  | -2.62916800 | -2.86880800 | 2.31912400  |
| C  | -3.71810400 | -2.04267200 | 2.67695900  |
| C  | -3.91626200 | -0.79823700 | 2.08157200  |
| H  | -0.86434000 | -3.10976500 | 1.08529800  |
| H  | -2.51278900 | -3.83188900 | 2.80776000  |
| H  | -4.41817100 | -2.38558900 | 3.43329900  |
| H  | -4.75541300 | -0.16849000 | 2.35905000  |
| C  | -1.76416200 | 0.59918600  | -0.42390200 |
| N  | -1.14781200 | -0.56031400 | -0.22172400 |
| N  | -2.86540800 | 0.74749200  | 0.34475800  |
| C  | -3.78429800 | 1.89353300  | 0.32522000  |
| H  | -4.05705400 | 2.11173800  | 1.36258400  |
| H  | -3.21945400 | 2.75111700  | -0.05106700 |
| C  | -5.03151000 | 1.64517600  | -0.53255900 |
| H  | -5.55946700 | 0.75594200  | -0.16399500 |
| H  | -4.71839000 | 1.42675400  | -1.56224200 |
| C  | -5.98070800 | 2.85158600  | -0.52044400 |
| H  | -6.27881600 | 3.06933400  | 0.51477700  |
| H  | -5.44473600 | 3.74002200  | -0.88300000 |
| C  | -7.23291200 | 2.62539700  | -1.37622500 |
| H  | -7.80719200 | 1.76213500  | -1.01668600 |
| H  | -7.89205600 | 3.50105900  | -1.34935600 |
| H  | -6.96734700 | 2.43768400  | -2.42432200 |
| Cl | 1.61457700  | -2.38706000 | -2.60008300 |
| Cu | 0.48627700  | -1.16730700 | -1.12775100 |
| S  | 2.03644600  | 0.15226500  | 0.02430500  |
| C  | 3.72199500  | -0.20998600 | -0.66378400 |
| H  | 3.93802800  | -1.27152800 | -0.52625800 |
| H  | 3.72196800  | 0.01072700  | -1.73321400 |
| C  | 4.72566800  | 0.64734300  | 0.06780100  |
| C  | 5.05017400  | 1.93096900  | -0.40308300 |
| C  | 5.34449000  | 0.18322700  | 1.24097400  |
| C  | 5.97673500  | 2.72750700  | 0.27572900  |

|   |             |             |             |
|---|-------------|-------------|-------------|
| H | 4.57841200  | 2.30281800  | -1.31004600 |
| C | 6.27109600  | 0.97779900  | 1.92194800  |
| H | 5.10227600  | -0.80849100 | 1.61666600  |
| C | 6.58942500  | 2.25358300  | 1.44174200  |
| H | 6.22245900  | 3.71508500  | -0.10648500 |
| H | 6.74630200  | 0.60045000  | 2.82391900  |
| H | 7.31134400  | 2.87146100  | 1.96942400  |
| H | -1.43396100 | 1.35972600  | -1.11774200 |

**1c**

|    |             |             |             |
|----|-------------|-------------|-------------|
| C  | 2.34124100  | -2.65031900 | -0.92474200 |
| C  | 1.53721400  | -2.64846800 | 0.23484900  |
| C  | 1.79688000  | -3.53388700 | 1.28875400  |
| C  | 2.87526900  | -4.40325600 | 1.14457000  |
| C  | 3.67576200  | -4.39847200 | -0.01972500 |
| C  | 3.42518900  | -3.52260800 | -1.07436800 |
| H  | 1.17944000  | -3.53996100 | 2.18202600  |
| H  | 3.10668400  | -5.10309200 | 1.94241600  |
| H  | 4.50754300  | -5.09296500 | -0.09469700 |
| H  | 4.04459300  | -3.52252100 | -1.96540000 |
| C  | 0.74470400  | -1.14052900 | -1.11653100 |
| N  | 0.54398100  | -1.68156200 | 0.08014100  |
| N  | 1.80264500  | -1.67649600 | -1.76226300 |
| C  | 2.29779800  | -1.28486200 | -3.08893100 |
| H  | 2.52211600  | -2.20423300 | -3.63964100 |
| H  | 1.47043200  | -0.78798300 | -3.60294600 |
| C  | 3.52602500  | -0.36873000 | -3.02626800 |
| H  | 4.32853500  | -0.86691900 | -2.46670000 |
| H  | 3.26602600  | 0.54181700  | -2.47045200 |
| C  | 4.02687700  | -0.00037800 | -4.43009900 |
| H  | 4.26419300  | -0.91967300 | -4.98389800 |
| H  | 3.21901900  | 0.49699100  | -4.98504900 |
| C  | 5.26084300  | 0.90980300  | -4.39772600 |
| H  | 6.09625700  | 0.42415600  | -3.87772400 |
| H  | 5.59501500  | 1.15615400  | -5.41245400 |
| H  | 5.04422200  | 1.85142900  | -3.87775400 |
| Cl | -1.67678400 | -0.71841400 | 3.34729700  |
| Cu | -0.88935400 | -1.21551000 | 1.33653800  |
| S  | -2.67404100 | -1.26854400 | -0.16293900 |
| C  | -4.18645500 | -0.68213400 | 0.74457600  |
| H  | -4.38112000 | -1.36322800 | 1.57537900  |
| H  | -3.99102000 | 0.31471600  | 1.14489100  |
| C  | -5.34355600 | -0.65883500 | -0.22372000 |
| C  | -5.62267300 | 0.49300100  | -0.97869200 |
| C  | -6.15660800 | -1.79189200 | -0.39603800 |
| C  | -6.69307600 | 0.51525400  | -1.87753000 |
| H  | -5.00152900 | 1.37741900  | -0.85467600 |
| C  | -7.22770600 | -1.77205000 | -1.29368500 |
| H  | -5.95160600 | -2.68971300 | 0.18278300  |

|   |             |             |             |
|---|-------------|-------------|-------------|
| C | -7.49857600 | -0.61802200 | -2.03841500 |
| H | -6.90037000 | 1.41681000  | -2.44853900 |
| H | -7.85231000 | -2.65430700 | -1.40889000 |
| H | -8.33250200 | -0.60115100 | -2.73537600 |
| H | 0.13566100  | -0.35901400 | -1.54855200 |
| C | -1.77223800 | 4.69985100  | -1.18963200 |

**1d**

|    |             |             |             |
|----|-------------|-------------|-------------|
| C  | 5.26613500  | -0.72986200 | 0.03538400  |
| C  | 4.40412300  | -1.57213300 | 0.77146600  |
| C  | 4.92232400  | -2.58121800 | 1.59342400  |
| C  | 6.30768900  | -2.71603800 | 1.65183900  |
| C  | 7.16231700  | -1.86971600 | 0.90998600  |
| C  | 6.65831400  | -0.86176400 | 0.08933500  |
| H  | 4.26389400  | -3.23194000 | 2.16159700  |
| H  | 6.74263300  | -3.48810600 | 2.28023600  |
| H  | 8.23759600  | -2.00653300 | 0.98132400  |
| H  | 7.31989900  | -0.21341000 | -0.47648800 |
| C  | 3.16119100  | -0.18818800 | -0.34983000 |
| N  | 3.08623500  | -1.20224600 | 0.50434300  |
| N  | 4.43641900  | 0.13700000  | -0.66977900 |
| C  | 4.84984800  | 1.22849100  | -1.55994400 |
| H  | 5.66743700  | 0.85393600  | -2.18478900 |
| H  | 4.00442700  | 1.44080000  | -2.22064700 |
| C  | 5.27326000  | 2.49247600  | -0.80049000 |
| H  | 6.09402200  | 2.24983700  | -0.11282000 |
| H  | 4.43160500  | 2.83614800  | -0.18438300 |
| C  | 5.71281400  | 3.61202000  | -1.75465300 |
| H  | 6.54947500  | 3.25593500  | -2.37209700 |
| H  | 4.89129500  | 3.84277000  | -2.44745600 |
| C  | 6.13057500  | 4.88857400  | -1.01442900 |
| H  | 6.97212900  | 4.69553900  | -0.33709300 |
| H  | 6.43975600  | 5.66981300  | -1.71891200 |
| H  | 5.30248900  | 5.28665600  | -0.41430900 |
| Cl | -0.27280500 | -2.93146800 | 2.13401300  |
| Cu | 1.46833000  | -1.94829800 | 1.22611100  |
| S  | -3.78636900 | -0.08339300 | -0.18136400 |
| C  | -5.30417400 | 0.39623900  | -1.14490000 |
| H  | -5.20531600 | 1.45003800  | -1.42434600 |
| H  | -5.36068900 | -0.20711200 | -2.05412000 |
| C  | -6.52679100 | 0.17489600  | -0.29017400 |
| C  | -7.22555500 | -1.04153800 | -0.34806700 |
| C  | -6.98285300 | 1.17541200  | 0.58408800  |
| C  | -8.35590400 | -1.25393200 | 0.44755600  |
| H  | -6.88488700 | -1.82394000 | -1.02274900 |
| C  | -8.11273900 | 0.96598600  | 1.37933600  |
| H  | -6.45142000 | 2.12302200  | 0.63857800  |
| C  | -8.80248100 | -0.25064300 | 1.31427900  |

|   |             |             |             |
|---|-------------|-------------|-------------|
| H | -8.88754500 | -2.20020500 | 0.38787300  |
| H | -8.45611500 | 1.75244000  | 2.04658300  |
| H | -9.68218800 | -0.41344600 | 1.93153600  |
| H | 2.29578700  | 0.32162900  | -0.75401600 |
| C | -0.48753800 | -2.17441200 | -3.64746300 |
| C | -1.79574600 | -1.75604200 | -4.03818500 |
| C | -2.45038600 | -0.80829300 | -3.29672400 |
| N | -1.83350100 | -0.26206200 | -2.20569400 |
| C | -0.54715600 | -0.63010200 | -1.79880000 |
| C | 0.12882100  | -1.62193900 | -2.54335900 |
| C | -2.37636200 | 0.66958500  | -1.23032200 |
| C | -1.14406400 | 0.91829300  | -0.39359600 |
| N | -0.13820300 | 0.07215100  | -0.73500300 |
| C | -1.02939600 | 1.91767800  | 0.63962900  |
| C | 0.13595500  | 1.99210400  | 1.44577600  |
| C | 0.26629200  | 2.96913800  | 2.42862300  |
| C | -0.75519100 | 3.90659700  | 2.64349900  |
| C | -1.91235700 | 3.84914700  | 1.85536600  |
| C | -2.05238500 | 2.87223400  | 0.87082000  |
| H | 0.02546700  | -2.93495000 | -4.22823900 |
| H | -2.27884600 | -2.17868600 | -4.91152400 |
| H | -3.44418100 | -0.44569000 | -3.53000100 |
| H | 1.12236700  | -1.92443200 | -2.23126600 |
| H | -2.81572100 | 1.54887400  | -1.71289300 |
| H | 0.93025100  | 1.27018600  | 1.29016200  |
| H | 1.16860200  | 3.00069300  | 3.03469400  |
| H | -0.65042900 | 4.66770800  | 3.41194900  |
| H | -2.71133100 | 4.57041900  | 2.00880700  |
| H | -2.96059700 | 2.84967200  | 0.27727800  |

## 1e

|   |             |             |             |
|---|-------------|-------------|-------------|
| S | 0.74686500  | -0.20801300 | -0.81814000 |
| C | 1.76748500  | -0.30481000 | 0.75748900  |
| H | 1.38519400  | 0.45312900  | 1.44556100  |
| H | 1.61249000  | -1.29314200 | 1.19640500  |
| C | 3.21689900  | -0.07160200 | 0.42676100  |
| C | 4.05074800  | -1.14375900 | 0.07025300  |
| C | 3.75675600  | 1.22429500  | 0.45118700  |
| C | 5.39416300  | -0.92724100 | -0.24835100 |
| H | 3.64639000  | -2.15340200 | 0.04870800  |
| C | 5.09992400  | 1.44371400  | 0.13266300  |
| H | 3.12336500  | 2.06419800  | 0.72782200  |
| C | 5.92252400  | 0.36800400  | -0.21845900 |
| H | 6.02769000  | -1.76892100 | -0.51614600 |
| H | 5.50367400  | 2.45246300  | 0.16231900  |
| H | 6.96771700  | 0.53719700  | -0.46391800 |
| C | -2.79952100 | -4.17930300 | 0.25359600  |
| C | -1.42452500 | -4.22668900 | -0.11255200 |



|   |             |             |             |
|---|-------------|-------------|-------------|
| C | -0.71790300 | -3.06863700 | -0.30098900 |
| N | -1.35218500 | -1.86293000 | -0.13272900 |
| C | -2.70308800 | -1.77375900 | 0.21179900  |
| C | -3.43391000 | -2.96763800 | 0.41366900  |
| C | -0.87664100 | -0.55242400 | -0.25838500 |
| C | -1.98726400 | 0.25999300  | 0.01567100  |
| N | -3.09131500 | -0.49779100 | 0.29662100  |
| C | -2.09371700 | 1.73283500  | 0.00031300  |
| C | -3.33035400 | 2.32446100  | -0.32168500 |
| C | -3.47702500 | 3.71232300  | -0.33902800 |
| C | -2.39175200 | 4.53966700  | -0.02920400 |
| C | -1.16101100 | 3.96388400  | 0.30127900  |
| C | -1.01254400 | 2.57478100  | 0.31720800  |
| H | -3.34597400 | -5.10519200 | 0.40403500  |
| H | -0.91982300 | -5.17712800 | -0.24645800 |
| H | 0.32578700  | -3.02721100 | -0.58665600 |
| H | -4.48124700 | -2.89368700 | 0.68672200  |
| H | -4.17341600 | 1.68461000  | -0.56225600 |
| H | -4.43915300 | 4.14806000  | -0.59635800 |
| H | -2.50514100 | 5.62056000  | -0.04144000 |
| H | -0.31366100 | 4.59564100  | 0.55518100  |
| H | -0.05469700 | 2.14754000  | 0.59006100  |

### TS c-d

|   |            |             |             |
|---|------------|-------------|-------------|
| C | 3.31147100 | -1.61143400 | -1.47981200 |
| C | 2.30907300 | -2.28327500 | -0.74455500 |
| C | 2.47310000 | -3.62623500 | -0.37956600 |
| C | 3.64896400 | -4.26241600 | -0.77093000 |
| C | 4.64324600 | -3.58281100 | -1.51085300 |
| C | 4.49424600 | -2.24585100 | -1.87703700 |
| H | 1.70632600 | -4.14434500 | 0.18909300  |
| H | 3.80722800 | -5.30370200 | -0.50441800 |
| H | 5.54502000 | -4.11444000 | -1.80148600 |
| H | 5.26041200 | -1.72964500 | -2.44704000 |
| C | 1.61361000 | -0.26289100 | -1.07977000 |
| N | 1.25640700 | -1.40189200 | -0.50448000 |
| N | 2.82693400 | -0.32376100 | -1.68484800 |
| C | 3.49580400 | 0.77236300  | -2.39430000 |
| H | 3.91454800 | 0.36412300  | -3.32041100 |
| H | 2.72184600 | 1.49254200  | -2.67625600 |
| C | 4.58212600 | 1.45572100  | -1.55465500 |
| H | 5.35426100 | 0.72368500  | -1.28366600 |
| H | 4.13512700 | 1.81009900  | -0.61632500 |
| C | 5.22342300 | 2.63193800  | -2.30390400 |
| H | 5.64133100 | 2.27402000  | -3.25545100 |
| H | 4.44542000 | 3.36405900  | -2.56238000 |
| C | 6.32503300 | 3.32189800  | -1.49030700 |
| H | 7.15197600 | 2.63226300  | -1.27866400 |

|    |             |             |             |
|----|-------------|-------------|-------------|
| H  | 6.73589400  | 4.18165600  | -2.03262700 |
| H  | 5.93853300  | 3.68550100  | -0.52963700 |
| Cl | -1.57070700 | -3.42864000 | 1.56266000  |
| Cu | -0.45730200 | -1.76034800 | 0.47386300  |
| S  | -1.94613800 | 0.22513700  | 0.07992400  |
| C  | -3.67984700 | -0.26798700 | 0.51683700  |
| H  | -3.63557200 | -1.04231200 | 1.28606100  |
| H  | -4.15705400 | 0.61453900  | 0.95078300  |
| C  | -4.44319700 | -0.76763800 | -0.69135500 |
| C  | -4.60305700 | 0.02526800  | -1.84128500 |
| C  | -5.03818000 | -2.03801400 | -0.66297800 |
| C  | -5.34929400 | -0.43691900 | -2.92766600 |
| H  | -4.13811600 | 1.00685400  | -1.88573000 |
| C  | -5.78582800 | -2.50347500 | -1.75101100 |
| H  | -4.91747600 | -2.66692000 | 0.21565700  |
| C  | -5.94308300 | -1.70481000 | -2.88715100 |
| H  | -5.46489000 | 0.19067500  | -3.80779000 |
| H  | -6.23989600 | -3.49025200 | -1.70953300 |
| H  | -6.52016400 | -2.06545500 | -3.73465900 |
| H  | 1.01495200  | 0.63803200  | -1.08505200 |
| C  | -1.93228200 | 5.29124700  | -0.80036100 |
| C  | -3.14970500 | 4.64196000  | -0.43597100 |
| C  | -3.11093000 | 3.49539400  | 0.31108400  |
| N  | -1.89703100 | 2.99231700  | 0.70635200  |
| C  | -0.68202700 | 3.61074300  | 0.38719300  |
| C  | -0.71308200 | 4.78656000  | -0.38899400 |
| C  | -1.60341100 | 1.75200700  | 1.36177200  |
| C  | -0.14721000 | 1.90965700  | 1.62033500  |
| N  | 0.35673900  | 2.96892400  | 0.94388400  |
| C  | 0.66068500  | 1.05017600  | 2.45903400  |
| C  | 2.05999400  | 1.24875700  | 2.54384200  |
| C  | 2.84448400  | 0.44646300  | 3.36740900  |
| C  | 2.26026600  | -0.57609100 | 4.12992200  |
| C  | 0.87887700  | -0.78691100 | 4.05365000  |
| C  | 0.08617100  | 0.01019500  | 3.22702400  |
| H  | -1.96882600 | 6.19712900  | -1.39724100 |
| H  | -4.10918500 | 5.04942300  | -0.73374300 |
| H  | -3.99268400 | 2.96354700  | 0.64748900  |
| H  | 0.22466300  | 5.27052300  | -0.63986300 |
| H  | -2.26854400 | 1.51687700  | 2.19219400  |
| H  | 2.51445200  | 2.04067300  | 1.95720300  |
| H  | 3.91713300  | 0.61612600  | 3.41804400  |
| H  | 2.87537500  | -1.20073900 | 4.77195800  |
| H  | 0.41525200  | -1.57834400 | 4.63648600  |
| H  | -0.98331800 | -0.17206900 | 3.19076700  |

## 16. References

1. K. Ghosh, S. Nath Barman, P. Choudhury and K. Biswas, *ChemistrySelect*, **ChemistrySelect**2024, *9* (9), e202304948.
2. J.-R. Zhang, Y.-Y. Liao, J.-C. Deng, K.-Y. Feng, M. Zhang, Y.-Y. Ning, Z.-W. Lin and R.-Y. Tang, *Chemical Communications*, 2017, **53**, 7784–7787.
3. X. Huang, S. Wang, B. Li, X. Wang, Z. Ge and R. Li, *RSC Advances*, 2015, **5**, 22654–22657.
4. N. Srivastava, M. Saxena and M. Shukla, *Rasayan J. Chem.*, 2019, **12**, 333–337.
5. M. Frisch, G. Trucks, H. Schlegel, G. Scuseria, M. Robb, J. Cheeseman, G. Scalmani, V. Barone, G. Petersson, H. Nakatsuji, *Rev. B. 01 Gaussian16*, *Gaussian. Inc.*, Wallingford CT 2016.
6. E. G. Hohenstein, S. T. Chill and C. D. Sherrill, *Journal of Chemical Theory and Computation*, 2008, **4**, 1996–2000.
7. M. Deb, S. Roy, N. Hassan, J. S. Deb Roy, N. N. Ghosh, P. K. Chattopadhyay, D. K. Maiti and N. R. Singha, *ACS Applied Polymer Materials*, 2023, **5**, 4820–4837.
8. J. Sankar Deb Roy, M. Deb, M. Hussain Sanfui, N. Hassan, S. Roy, D. Chowdhury, B. Das, M. Rahaman, N. Nath Ghosh, M. Chang, S. Majumdar, P. Kanti Chattopadhyay and N. Ranjan Singha, *European Polymer Journal*, 2024, **206**, 112754.
9. N. N. Ghosh, Md. Habib, A. Pramanik, P. Sarkar and S. Pal, *New Journal of Chemistry*, 2019, **43**, 6480–6491.
